# Supplementary material for: Impact of policy support on uptake of evidence-based continuous quality improvement activities and the quality of care for Indigenous Australians: a comparative case study
Source: PubMed Central journal article supplement — BMJ Open. 2017 Oct 5;7(10):e016626. doi: 10.1136/bmjopen-2017-016626 (PMC5639983; doi:10.1136/bmjopen-2017-016626), 2017-10-05
Supplement: bmjopen-2017-016626.draft_revisions.pdf [file bmjopen-2017-016626.draft_revisions.pdf]

# BMJ Open

BMJ Open is committed to open peer review. As part of this commitment we make the peer review history of every article we publish publicly available.

When an article is published we post the peer reviewers' comments and the authors' responses online. We also post the versions of the paper that were used during peer review. These are the versions that the peer review comments apply to.

The versions of the paper that follow are the versions that were submitted during the peer review process. They are not the versions of record or the final published versions. They should not be cited or distributed as the published version of this manuscript.

BMJ Open is an open access journal and the full, final, typeset and author-corrected version of record of the manuscript is available on our site with no access controls, subscription charges or pay-per-view fees (<http://bmjopen.bmj.com>).

If you have any questions on BMJ Open's open peer review process please email [info.bmjopen@bmj.com](mailto:info.bmjopen@bmj.com)

# BMJ Open

## Impact of policy support on uptake of evidence-based continuous quality improvement activities and the quality of care for Indigenous Australians: a comparative case study

|                                 |                                                                                                                                                                                                                                                                                                                                                                                                                                                                                                                                                                                                                                                                                                                                                   |
|---------------------------------|---------------------------------------------------------------------------------------------------------------------------------------------------------------------------------------------------------------------------------------------------------------------------------------------------------------------------------------------------------------------------------------------------------------------------------------------------------------------------------------------------------------------------------------------------------------------------------------------------------------------------------------------------------------------------------------------------------------------------------------------------|
| Journal:                        | <i>BMJ Open</i>                                                                                                                                                                                                                                                                                                                                                                                                                                                                                                                                                                                                                                                                                                                                   |
| Manuscript ID                   | bmjopen-2017-016626                                                                                                                                                                                                                                                                                                                                                                                                                                                                                                                                                                                                                                                                                                                               |
| Article Type:                   | Research                                                                                                                                                                                                                                                                                                                                                                                                                                                                                                                                                                                                                                                                                                                                          |
| Date Submitted by the Author:   | 02-Mar-2017                                                                                                                                                                                                                                                                                                                                                                                                                                                                                                                                                                                                                                                                                                                                       |
| Complete List of Authors:       | Bailie, Ross; University of Sydney, University Centre for Rural Health<br>Matthews, Veronica; Menzies School of Health Research,<br>Larkins, Sarah; James Cook University, College of Medicine and Dentistry<br>Thompson, Sandra; University of Western Australia, Western Australian<br>Centre for Rural Health<br>Burgess, Paul; Northern Territory Department of Health and Families<br>Weeramanthri, Tarun; Western Australia Department of Health<br>Bailie, Jodie; University of Sydney, University Centre for Rural Health<br>Cunningham, Frances; Menzies School of Health Research,<br>Kwedza, Ru; University of New South Wales, School of Public Health and<br>Community Medicine<br>Clarke, Louise; Menzies School of Health Research |
| <b>Primary Subject Heading</b>: | Health services research                                                                                                                                                                                                                                                                                                                                                                                                                                                                                                                                                                                                                                                                                                                          |
| Secondary Subject Heading:      | Health services research                                                                                                                                                                                                                                                                                                                                                                                                                                                                                                                                                                                                                                                                                                                          |
| Keywords:                       | PRIMARY CARE, AUDIT, Clinical audit < HEALTH SERVICES<br>ADMINISTRATION & MANAGEMENT, Health policy < HEALTH SERVICES<br>ADMINISTRATION & MANAGEMENT, Quality in health care < HEALTH<br>SERVICES ADMINISTRATION & MANAGEMENT                                                                                                                                                                                                                                                                                                                                                                                                                                                                                                                     |
|                                 |                                                                                                                                                                                                                                                                                                                                                                                                                                                                                                                                                                                                                                                                                                                                                   |

SCHOLARONE™  
Manuscripts

1  
2  
3  
4 **Impact of policy support on uptake of evidence-based continuous quality**  
5 **improvement activities and the quality of care for Indigenous Australians:**  
6 **a comparative case study**  
7  
8

9  
10 Ross Bailie<sup>1</sup>, Veronica Matthews<sup>2</sup>, Sarah Larkins<sup>3</sup>, Sandra C Thompson<sup>4</sup>, Paul Burgess<sup>5</sup>,  
11 Tarun Weeramanthri<sup>6</sup>, Jodie Bailie<sup>1</sup>, Frances Cunningham<sup>2</sup>, Ru Kwedza<sup>7</sup>, Louise Clark<sup>2</sup>  
12  
13

14  
15 <sup>1</sup>University Centre for Rural Health, University of Sydney, Lismore, Australia

16 <sup>2</sup>Menzies School of Health Research, Charles Darwin University, Brisbane, Australia

17 <sup>3</sup>College of Medicine and Dentistry, James Cook University, Townsville, Australia

18 <sup>4</sup>Western Australian Centre for Rural Health, the University of Western Australia, Geraldton,  
19 Australia  
20  
21

22 <sup>5</sup>Northern Territory Department of Health, Darwin, Australia

23 <sup>6</sup>Department of Health, Government of Western Australia, Perth, Australia

24 <sup>7</sup>School of Public Health and Community Medicine, University of New South Wales,  
25 Australia  
26  
27  
28  
29

30  
31  
32 **Corresponding author:**

33 Ross Bailie

34 University Centre for Rural Health, University of Sydney

35 61 Uralba Street

36 Lismore NSW 2480

37 Australia

38 Email: [ross.bailie@sydney.edu.au](mailto:ross.bailie@sydney.edu.au)

39 Phone: +61 417 818 309  
40  
41  
42  
43  
44  
45

46 **Key Words:** Continuous Quality Improvement; primary health care; health policy;  
47 Aboriginal and Torres Strait Islander health  
48  
49

50  
51 **Word count:** 3700  
52  
53  
54  
55  
56  
57  
58  
59  
60

## ABSTRACT

**Objectives:** To examine the impact of state/territory policy support on 1) uptake of evidence-based continuous quality improvement (CQI) activities, and 2) quality of care for Indigenous Australians.

**Design:** Mixed-method comparative case study methodology, drawing on quality of care audit data, documentary evidence of policies and strategies, and the experience and insights of stakeholders involved in relevant CQI programs. We use multilevel linear regression to analyse jurisdictional differences in quality of care.

**Setting:** Indigenous primary health care services across five states/territories of Australia.

**Participants:** 175 Indigenous primary health care services.

**Interventions:** A range of national and state/territory policy and infrastructure initiatives to support CQI, including support for applied research.

**Primary and secondary outcome measures:**

- i) trends in the consistent uptake of evidence-based CQI tools available through a research-based CQI initiative (the Audit and Best Practice in Chronic Disease (ABCD) Program); and
- ii) quality of care (as reflected in adherence to best practice guidelines)

**Results:** Progressive uptake of evidence-based CQI activities and steady improvements or maintenance of high-quality care occurred where there was long-term policy and infrastructure support for CQI. Where support was provided but not sustained there was a rapid rise and subsequent fall in relevant CQI activities.

**Conclusions:** Health authorities should ensure consistent and sustained policy and infrastructure support for CQI to enable wide-scale and ongoing improvement in quality of care and, subsequently, health outcomes. It is not sufficient for improvement initiatives to rely on local service managers and clinicians, as their efforts are strongly mediated by higher system level influences.

## STRENGTHS AND LIMITATIONS OF THIS STUDY

- Using a mixed-method comparative case study methodology and drawing on data from 175 Indigenous primary health care services across Australia, we examine the impact of state/territory policy support and strategies on 1) uptake of CQI activities, and 2) quality of care for Indigenous Australians.
- Our analysis of several years of data from the largest and most comprehensive CQI program in Australia shows that consistent and sustained policy and infrastructure support for CQI enables wide-scale and ongoing improvement in quality of care and, subsequently, health outcomes.
- Our study adds to the accumulating evidence on the conditions that enable CQI efforts to be most effective.
- The authors of this paper have all had longstanding involvement with a national CQI program as researchers, service providers, managers or policy makers/advisors.
- A limitation of our study is that it is not possible to clearly attribute the extent to which trends in data on quality of care have been influenced by various concurrent policy and other initiatives.

## INTRODUCTION

Internationally there is wide variation in adherence to best practice clinical guidelines between health services and between health professionals.[1] There is a growing body of evidence about the effectiveness of continuous quality improvement (CQI) in increasing adherence to guidelines and on the factors that contribute to this.[2] Variation in quality of care between health services has been demonstrated, including in populations with poorer health status, such as Aboriginal and Torres Strait Islander (hereafter respectfully referred to as Indigenous) peoples in Australia.[3,4]

### *Indigenous people's health, and access to primary health care*

Australia is a high-income country with gross disparities in health outcomes between Indigenous and non-Indigenous people. This inequity has complex causes, including historical trauma and dispossession as a result of colonisation, social and economic conditions, and persistent racism. While the Indigenous population is about 730,000 (3% of the Australian total), the numbers and proportion of the population varies widely between jurisdictions.[5]

Indigenous people access primary health care (PHC) through services specifically established to meet their needs - both community-controlled and government-managed – and private general practice.

### *Positive policy environment*

A recently proposed four-level framework to describe the causes of the 'evidence–practice gap'[6] backs up previous work that has called for change at multiple levels of the health system to support wide-scale improvement in the quality of care.[7] While system-wide approaches to CQI have been associated with achieving large-scale improvements in health outcomes, there is limited evidence of the effectiveness of CQI over an extended period.[2] A positive policy environment is widely recognised as vital for effective development and implementation of programs to prevent and manage chronic disease,[8] with previous cross-regional analyses identifying the importance of regional level policies in enhancing clinical performance in Indigenous PHC in Australia.[4] However, there is limited evidence as to the effect of government policy on the uptake and impact of CQI over time.

1  
2  
3 This paper examines the influence of health policy decisions at the Australian state/territory  
4 level and how these may have influenced:  
5

- 6 i) trends in the consistent uptake of evidence-based CQI tools available through a  
7 research-based CQI initiative (the Audit and Best Practice in Chronic Disease  
8 (ABCD) Program; and  
9  
10  
11 ii) quality of care (as reflected in adherence to best practice guidelines) in Indigenous  
12 PHC services.  
13  
14  
15

### 16 *National policy context - CQI in Indigenous PHC*

17 The rapid growth since 2002 in CQI initiatives in Indigenous PHC has been supported to  
18 varying extents by several large-scale CQI programs operating across a number of Australian  
19 states/territories, for example, the Australian Primary Care Collaborative (APCC), Healthy  
20 for Life, and the ABCD Program.[9-11] As a program of applied research, ABCD is the  
21 longest running and most extensively documented of these initiatives (Table 1). To some  
22 extent, the Healthy for Life program encouraged use of ABCD tools and processes by  
23 commissioning and promoting some of the audit tools in the program. Similarly, engagement  
24 with the APCC may have been a stimulus for services to explore the use of ABCD tools and  
25 processes, and vice versa. In 2015, the Australian Government Department of Health  
26 provided funding for the development and implementation of a National CQI Framework for  
27 Aboriginal and Torres Strait Islander PHC,[9] which outlines roles and responsibilities for  
28 CQI at various levels of the system.  
29  
30  
31  
32  
33  
34  
35  
36  
37  
38  
39  
40  
41  
42

[INSERT Table 1]

43 **Table 1: The ABCD Program and CQI tools**

44  
45 The ABCD Program is a CQI action research project that has employed a systems approach  
46 to enhancing care delivered through Indigenous PHC services across Australia.[3]  
47 Commencing in 2002, ABCD has brought together service providers, policy makers and  
48 researchers in a collaborative program of applied research, with the aims of developing and  
49 enhancing the feasibility of CQI tools and processes on a wide scale, examining factors  
50 associated with variation in quality of care and strategies that have been effective in  
51 improving quality of care, and to work together to enhance the implementation of effective  
52 strategies. We have previously reported on factors that influence variation in quality of care  
53  
54  
55  
56  
57  
58  
59  
60

1  
2  
3 between health services [10] and are engaged in an ongoing program of research on priorities  
4 and strategies for improvement.[24] Supported by a national CQI support entity  
5 (One21seventy), since 2010, more than 270 Indigenous PHC services have used standardised  
6 evidence-based best-practice clinical audit and system assessment tools to assess and reflect  
7 on health service system performance, typically on an annual basis. The tools have been used  
8 to varying extent in all Australian states/territories.  
9  
10  
11  
12

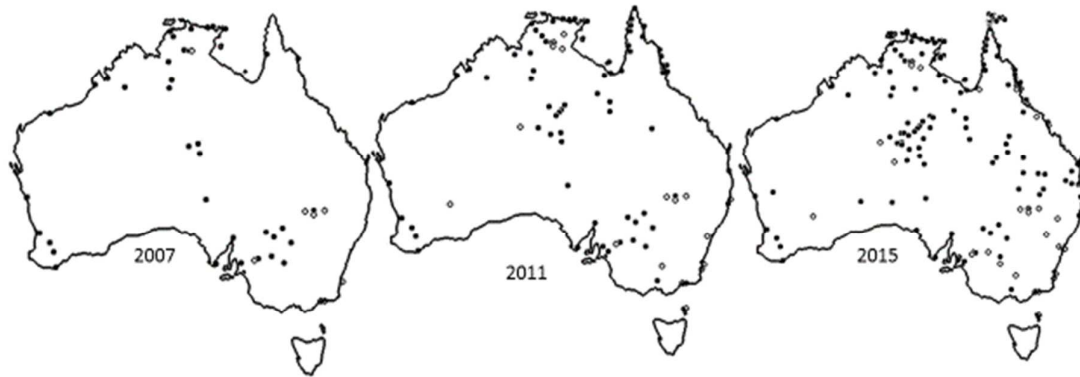

27  
28 *Distribution and use ABCD Program CQI tools in health services, over time, as at 2007,*  
29 *2011 and 2015*  
30

31  
32  
33 CQI tools developed through the ABCD Program cover priority aspects of PHC (including  
34 preventive care, diabetes, child health, and maternal health). The clinical audit tools were  
35 developed by expert working groups, with participation of specialists in relevant aspects of  
36 care and health service staff.[3] The tools were designed to enable services to assess their  
37 work against best practice standards as reflected in widely accepted evidence-based  
38 guidelines; each tool is accompanied by an audit protocol. The ABCD audit tools are ideally  
39 used in a system-oriented collaborative and supportive CQI approach, together with an  
40 assessment of health service system performance conducted by health service staff in a  
41 facilitated group discussion using a standardized systems assessment tool.[25] The evidence  
42 of effectiveness of the ABCD CQI process [12] is consistent with international evidence of  
43 effectiveness of quality improvement strategies. [2]  
44  
45  
46  
47  
48  
49  
50  
51  
52  
53  
54  
55  
56  
57  
58  
59  
60



### ***The ABCD Program***

For the duration of its operation the ABCD program has had a strong focus on both developing the evidence base for CQI in Indigenous PHC as well as supporting implementation of evidence based CQI practices. The ABCD program, and its associated service support arm One21seventy, has been used most extensively in the Northern Territory (NT) and Queensland by both government and community-controlled Indigenous PHC services, and to a lesser extent in New South Wales (NSW), South Australia (SA) and Western Australia (WA). The timing and nature of policy and funding support for ABCD and other CQI programs has varied between jurisdictions. The most substantial support was available in the NT and Queensland, and was generally of smaller scale and more fragmented in NSW, SA and WA.[9](Table 1).

### **METHODS**

We use a comparative case study design to relate state/territory level policy support for CQI to trends in its uptake and in quality of care. The five states/territories provide the ‘cases’ for comparison as they all have some consistent CQI data available through participation by services in the ABCD Program.

Information on the use of CQI processes and tools, and on policy and infrastructure support for CQI initiatives is drawn from publicly available sources. Information from these documentary sources is supplemented by the experience and insights of the authors, all of whom have been closely involved (including as service providers, managers, policy makers and advisors, CQI coordinators, and researchers) over an extended period in relevant CQI programs.

Data on CQI activity and on adherence to clinical best practice guidelines were available through ABCD. This paper focuses on four priority aspects of care: preventive, Type 2 diabetes, maternal care and child health. The CQI and clinical record audit processes through which data are collected and reported at health service level are summarized in Table 1 and Additional File 1, and described in more detail elsewhere.[3,12]

### ***Outcome measures***

For the purpose of assessing extent of CQI activity using ABCD standard tools we sum the number of different audit tools used in each health service in each year for each jurisdiction.

1  
2  
3  
4  
5 We use a composite Quality of Care Index (QCI) to measure overall adherence to evidence  
6 based clinical best practice guidelines in the delivery of care for each audit tool over  
7 successive years. The QCIs provide a measure of adherence to a package of evidence based  
8 practices within each area of care. They therefore provide a more holistic measure of quality  
9 of clinical care (for example overall delivery of type 2 diabetes care) than specific items of  
10 care (for example monitoring or control of HbA1c). We report on these QCIs for only the NT  
11 and Queensland, as these jurisdictions had data available from a large number of health  
12 services. QCIs were calculated by dividing the number of client service delivery items  
13 documented as delivered for each client by the total number of service delivery items  
14 included in the QCI as reported previously.[12] We use box plots to report QCIs for  
15 participating health services by jurisdiction for consecutive years, and for consecutive audit  
16 cycles for health services that completed audits for at least three cycles (Additional File 2).  
17 Data on additional cycles are reported where there were data from at least half of the health  
18 services that completed audits in at least three cycles.  
19  
20  
21  
22  
23  
24  
25  
26  
27  
28

### 29 *Statistical analysis*

30  
31 As the data have a hierarchical structure (patients within health services), mixed multi-level  
32 linear regressions were run to test the effect of jurisdictional location (Northern Territory and  
33 Queensland) on service delivery (as measured by the QCI). Up to four audit cycles were  
34 included in the analysis where there were sufficient numbers of health services to enable  
35 cross-jurisdictional comparison. The level of service delivery to individual clients  
36 (continuous variable: percentage of QCI delivered) was modelled with health service as an  
37 additional level random effect. Each model included adjustments for year of audit and  
38 number of audit cycles completed. Jurisdictional location (categorical) was included as a  
39 fixed effect. Variance Partition Coefficients were calculated to measure how much variability  
40 in adherence to best practice guidelines between health services was attributable to  
41 jurisdictional location. Inspection of residual plots showed no obvious deviations from  
42 normality or homoscedasticity. P-values were obtained by likelihood ratio tests of the model  
43 with jurisdictional location against the empty model without this effect. A p-value  $\geq 0.05$  was  
44 considered statistically non-significant. Statistical analyses were conducted with STATA  
45 software, V.14.  
46  
47  
48  
49  
50  
51  
52  
53  
54  
55

### 56 *Ethics approval*

Ethical approval for the ABCD National Research Partnership was obtained from research ethics committees in each relevant Australian jurisdiction.[3]

## FINDINGS

### *Policy initiatives that may have influenced uptake of the ABCD Program CQI, by state and territory*

A number of national CQI initiatives may have influenced uptake of ABCD along with those being implemented simultaneously by the states/territories.[9,11] An overview of CQI policy initiatives, by jurisdiction, showing the greatest uptake of the ABCD CQI tools is presented in summary form in Table 2 and in more detail in Additional File 3.

[INSERT Table 2]

**Table 2: Key policy and resourcing developments for CQI initiatives including ABCD 2005-2015**

| <b><i>National initiatives that supported CQI across multiple jurisdictions</i></b>                                                                                                                                                                                                                                                                                                                                                                                                      |
|------------------------------------------------------------------------------------------------------------------------------------------------------------------------------------------------------------------------------------------------------------------------------------------------------------------------------------------------------------------------------------------------------------------------------------------------------------------------------------------|
| <ul style="list-style-type: none"> <li>• Continuous Improvement Projects (2002-2006)</li> <li>• Australian Primary Care Collaborative (2005–ongoing)</li> <li>• Healthy for Life Program– while not specifically a CQI Program, it did have a CQI component (2005–ongoing)</li> <li>• One21seventy – National Centre for Quality Improvement in Indigenous Primary Health Care (2010–2016)</li> </ul>                                                                                    |
| <b><i>State and Territory programs</i></b>                                                                                                                                                                                                                                                                                                                                                                                                                                               |
| <b>Northern Territory</b> <ul style="list-style-type: none"> <li>• Government and ACCHO sectors supported CQI research through the original ABCD Project (2002-2005) and the ABCD Extension Project (2005-2009)</li> <li>• NT CQI Strategy endorsed by the Aboriginal Health Forum (2009)</li> <li>• By 2012, wide-scale employment of CQI Coordinators and Facilitators to support PHC services across the NT</li> <li>• External evaluation of the NT CQI investment (2013)</li> </ul> |
| <b>Queensland</b> <ul style="list-style-type: none"> <li>• Review commissioned to identify best options for improving Indigenous health</li> </ul>                                                                                                                                                                                                                                                                                                                                       |

identifies CQI as a priority (2005 - 2006)

- Development and implementation of CQI program endorsed at senior government level (2007)
- Employment of CQI Coordinators and Facilitators to support PHC services across Qld in 2008, with another major investment in CQI support in 2010 – including contract with One21seventy to provide CQI support to services
- North Queensland Steering committee established in 2008 with key stakeholders, including Royal Flying Doctor Service, Apunipima Cape York Health Council and Queensland Health
- Peak community-controlled organisation implemented ‘collaborative style’ CQI processes using electronic data extraction (2010)
- State-wide CQI steering committee established in 2011

#### **New South Wales**

- NSW Health provided funding to the peak community-controlled organisation AH&MRC to support CQI among NSW ACHHS through building infrastructure, skills and data collection systems, and to share models of good practice (2006)
- Several NSW Indigenous PHCs commenced use ABCD CQI tools through contracts with One21seventy in 2010 on their own initiative
- AH&MRC published CQI Success Stories from ten ACCHSs (2015)

#### **Western Australia**

- WA Health provided funds for a CQI project officer to support ABCD Program in WA (2005-9)
- Peak community-controlled organisation, AHCWA conducted a pilot of the Australian Primary Care Collaborative in several ACCHSs (2006-7)
- AHCWA Research Partnership on CQI (2012-15)
- Holman review recommended implementation of a state-wide CQI program, with reference to One21seventy (2014)
- AHCWA reported actively promoting CQI to all member services (2014-15)

#### **South Australia**

- Review of the evidence (2008-2009)
- SA Health and Lowitja Institute provided funds for a CQI project officer to support ABCD Program in SA (2010-14)

- SA Quality Improvement Officer based at peak community-controlled organisation ACHSA supporting analysis and feedback to community-controlled health services in SA.

### **Engagement with ABCD Research in each State and Territory**

#### **Northern Territory**

- ABCD Program originated in 12 health services in the NT (2002), building on prior work on chronic disease, best-practice guidelines, clinical information systems in Indigenous PHC
- ABCD Extension phase supported development of a CQI hub in Central Australia and Top End (2005)
- All NT Government Health services and many ACCHS participated in the ABCD National Research Partnership 2011-14, with NT ABCD Project officer supported by funding from NT Health

#### **Queensland**

- ABCD Extension phase supported development of a CQI hub in Qld (2007/8)
- All Qld Health services and several ACCHS participated in the ABCD National Research Partnership 2011-14, with Qld ABCD Project officer supported by funding from the Lowitja Institute

#### **New South Wales**

- Maari Ma Health Aboriginal Corporation in far west NSW commenced with ABCD Program (2005)
- Maari Ma Health Aboriginal Corporation participates in the ABCD National Research Partnership 2011-14

#### **Western Australia**

- ABCD Extension phase supported development of a CQI hub in Western Australia (2005)
- Several ACCHS and WA Health services participated in the ABCD National Research Partnership 2011-14, with WA ABCD Project officer supported by funding from the Lowitja Institute

#### **South Australia**

- A few Aboriginal community-controlled health services commenced using ABCD tools on their own initiative (2006)
- 10 ACCHS & 5 SA Health services participated in the ABCD National Research

Partnership 2011-14, with SA ABCD Project officer supported by funding from the Lowitja Institute and SA Health

Notes: CQI – continuous quality improvement; ABCD – Audit and Best Practice for Chronic Disease; PHC – primary health care; QAIHC – Queensland Aboriginal and Islander Health Council; AH&MRC – Aboriginal Health and Medical Research Council; AHCWA – Aboriginal Health Council of Western Australia; ACHSA – Aboriginal Health Council of South Australia; ACCHS – Aboriginal Community-Controlled Health Service; ACCHO - Aboriginal Community-Controlled Health Organisation.

A total of 286 Indigenous PHC services used ABCD standard tools and reported data through the One21seventy web-based information system between 2005 and 2014. Of these health services, 175 voluntarily provided de-identified clinical audit data for analysis and reporting.

#### *Northern Territory*

The most substantial early uptake of the CQI tools was in the NT (Table 2; Figure 1; Additional File 3) where they were implemented in 12 health services following the first evidence of their success.[3] There was a decline in the use of the tools in the NT in 2010, the final year of the extension phase of the ABCD research project, followed by a large increase in use the following year. This increase coincided both with the establishment of One21seventy as a service support agency for using ABCD CQI tools and processes, and with the commencement of the NT CQI Strategy and corresponding funding support. The use of ABCD CQI tools plateaued over the period 2012-2014. An external evaluation commissioned by the NT Government supported sustainability and embedding of processes.[13]

#### *Queensland*

In Queensland, use of the ABCD CQI tools commenced in 2007/8, with the engagement of Queensland Health and some community-controlled PHC services (largely in the north of the state) in the ABCD Program (Table 2; Figure 1; Additional file 3). This followed an internal review of evidence on improving health care delivery, and subsequent recommendations to increase investment in CQI in 2008 and again in 2010. There was a rapid increase in the use of the tools to a peak in 2011 and 2012, following the second investment by Queensland Health in CQI coordinators and facilitators and in supporting health services to access ABCD tools and the One21seventy web-based information system. There was a marked decline in

1  
2  
3 the use of the ABCD CQI tools in 2013 and 2014, following the change in Government in  
4 2012, a lack of policy support and cuts in funding.  
5  
6

#### 7 8 *New South Wales*

9 Use of the ABCD CQI tools in NSW peaked in 2008 and 2009, but declined as the state's  
10 early leading exponent of CQI, Maari Ma Health Aboriginal Corporation in Broken Hill,  
11 shifted attention to using the ABCD audit tools in selected aspects of clinical care and  
12 applying CQI techniques to the management of various organizational systems and processes  
13 (Table 2; Figure 1; Additional file 3). There was some continuing use of ABCD CQI tools in  
14 Maari Ma Health and in other NSW services despite the absence of direct support for the use  
15 of these tools from NSW health authorities.  
16  
17  
18  
19  
20  
21

#### 22 23 *Western Australia*

24 In WA, use of the ABCD CQI tools increased from 2005 to a peak in 2008 and 2009 across  
25 several health services (Table 2; Figure 1; Additional file 3). The decline in usage coincided  
26 with the end of ABCD's extension phase, but a number of health services continued to use  
27 the tools despite relatively limited engagement with ongoing research and no direct support  
28 from WA health authorities.  
29  
30  
31  
32  
33

#### 34 35 *South Australia*

36 A small number of services used the ABCD CQI tools in SA between 2006 and 2010, and  
37 slightly more between 2011 and 2014 – the increase coinciding with provision of limited  
38 funding and policy support from research and SA health (Table 2; Figure 1; Additional file  
39 3). This policy support occurred after an internal review (similar to Queensland) on the  
40 evidence and best options to improving delivery of care.  
41  
42  
43  
44  
45

#### 46 47 *Trends in quality of care*

48 The QCI of adherence to best practice guidelines for health services in the NT generally  
49 show improvement over audit cycles and over successive years. More specifically, between  
50 cycles 1 and 4 the median % of services delivered for participating health centres increased  
51 by more than 25% for overall preventive care, and by about 10% for overall type 2 diabetes  
52 care and overall child health care (Additional file 2, Table 3). There was also improvement in  
53 the median % of services delivered in successive years for all four areas of care. The  
54 improvement in the NT is accompanied by a reduction in variation between health services  
55  
56  
57  
58  
59  
60

for preventive care and child health QCI, due to improvement among poorer performing health services.

[INSERT Table 3]

**Table 3: Summary of care quality trends over years and CQI cycles in Northern Territory and Queensland.**

| <i>Area of Care</i> | Trend over time |     | Trend over CQI cycles |     | Variation over CQI cycles |     |
|---------------------|-----------------|-----|-----------------------|-----|---------------------------|-----|
|                     | NT              | Qld | NT                    | Qld | NT                        | Qld |
| Diabetes            | ↑               | ~   | ↑                     | ~   | *                         | ~   |
| Preventive          | ↑               | ~   | ↑                     | ~   | ~                         | ~   |
| Child               | ↑               | ↓   | ↑                     | ~   | ~                         | ~   |
| Maternal            | ↑               | ↑   | ↑                     | ↑   | *                         | ~   |

Legend:    ↑ Improvement    ~ No change    ↓ Decrease    \* Reduced variation

Notes: NT – Northern Territory; Qld – Queensland; CQI –continuous quality improvement

In Queensland, the QCIs of adherence to best practice guidelines show a mixed picture. There was improvement in the median % of services delivered for participating health centres between audit cycles 1 and 4 of about 15% for overall antenatal care. For overall type 2 diabetes care and overall preventive care there was an increase in the median % of services delivered of about 10% and 5% respectively between audit cycles 1 and 3, followed by a decline at audit cycle 4 (Additional file 2, Table 3). There was no clear trend for diabetes care over successive years or over audit cycles, or for preventive care over time. There was a declining trend over successive years and no clear increasing or decreasing trend over audit cycles for child health. Nor was there a clear reduction in variation between health services in any of the four areas of care over time or over audit cycles.

The multi-level linear regression analyses showed that there was a significant difference between the two jurisdictions for preventive and diabetes care. After adjusting for year of audit and number of cycles completed, the predicted increase in adherence to best practice for NT compared to Queensland health services was 12% (95%CI: 5.61-17.70; p<0.0001) and 16% (95%CI: 11.87-19.58; p<0.0001) for preventive and diabetes care respectively.



1  
2  
3 Jurisdictional location accounted for 17% and 18.2% of the explained variability in adherence  
4 to best practice guidelines for both. There was no significant difference between jurisdictions  
5 in relation to child or maternal care (Additional file 4).  
6  
7  
8

## 9 10 **DISCUSSION**

11 Progressive and sustained uptake of ABCD tools occurred in the NT in the context of  
12 consistent long-term policy and infrastructure support for CQI. This contrasted with a) a  
13 rapid rise and subsequent fall in uptake of these tools in Queensland where the initial high-  
14 level policy and infrastructure support was not sustained following a change of government  
15 in 2012; and b) low levels of uptake in jurisdictions with relatively less policy and  
16 infrastructure support (NSW, WA, SA). The consistent long-term policy and infrastructure  
17 support for CQI in the NT was also associated with steady improvements or maintenance of  
18 high-quality care (as reflected in clinical best practice guidelines) for the four aspects of care  
19 that were the major focus of ABCD CQI efforts, and reduction in variation between health  
20 services for two of these. This contrasted with the situation in Queensland where there was a  
21 relatively limited effect on adherence to best practice guidelines and on variation between  
22 health services.  
23  
24  
25  
26  
27  
28  
29  
30  
31

32  
33 While this study does not provide an in-depth examination of the complex processes that  
34 might explain different trends in the uptake of tools, or how CQI processes have impacted on  
35 quality of care in different jurisdictions, some insight has been provided by previous studies  
36 of the ABCD CQI program [10,12, 14-19] and the evaluation of the NT CQI Strategy. [13]  
37 Gardner highlighted the complexity of the process of uptake of CQI, and the critical role of  
38 alignment of policies and incentives; a systems approach; organization-wide commitment;  
39 leadership at all levels; and resources to support implementation.[14] Our findings of  
40 relatively low uptake of CQI in jurisdictions with limited policy and infrastructure support,  
41 and the rapid drop in use of CQI tools when policy, infrastructure and funding support was  
42 withdrawn in Queensland, highlights the critical role these play in supporting its uptake. In  
43 other states, the lack of clear and consistent policy direction, resourcing and sustained high-  
44 level leadership and management support for CQI, and relative lack of engagement in wide-  
45 scale CQI research has led to a diversity of locally driven initiatives with an associated lack  
46 of systematic analysis and reporting of data for CQI purposes. This appears to have been a  
47  
48  
49  
50  
51  
52  
53  
54  
55  
56  
57  
58  
59  
60

1  
2  
3 barrier to demonstrably effective uptake of CQI in many Indigenous PHC services between  
4 2005 and 2014.  
5  
6

7  
8 The limited availability of data for systematic analysis and reporting of relevant data, other  
9 than in Queensland and NT, has precluded meaningful analysis of adherence to best practice  
10 guidelines for most states/territories. The first report on national Key Performance Indicators  
11 (nKPIs) from Indigenous PHC organizations showed that in 2012-13 those in Queensland  
12 and the NT performed better against almost all process-of-care indicators,[20] attributing this  
13 to the relatively well-established CQI programs in these jurisdictions. The third and most  
14 recent nKPI report, which includes data up to December 2014,[21] shows improvements for  
15 17 of the 19 process-of-care measures for all jurisdictions combined, with continued  
16 relatively high performance in the NT and Queensland and most marked recent improvement  
17 in WA. The analysis presented in this paper points to the importance of high-level policy  
18 support and resourcing for implementation of systematic CQI processes to enhance quality of  
19 care. The relatively high performance, and the greater ability to report nKPI data, in the NT  
20 and Queensland demonstrate the benefits of systematic CQI processes for reporting of data  
21 on KPIs as well as for enhancing quality of care.  
22  
23  
24  
25  
26  
27  
28  
29  
30  
31

32  
33 The independent evaluation of the NT CQI Strategy provides important insights into the  
34 relative success of CQI initiatives in the NT. There has been no comparable publicly  
35 available independent evaluation in Queensland, NSW, WA or SA, and it may be that an  
36 external evaluation such as that of the Strategy plays a role in ensuring sustainability and  
37 momentum. The formalized collaborative engagement of the community-controlled and  
38 government sectors in the NT through the Aboriginal Health Forum, and the shared  
39 commitment and enthusiasm for a territory-wide CQI Strategy, have also contributed to the  
40 achievements in the NT. Given the importance of working effectively together to respond to  
41 the complex care needs of Indigenous patients, it appears that a partnership approach adopted  
42 across service sectors is a critical component underpinning efforts in improving quality of  
43 care.  
44  
45  
46  
47  
48  
49  
50  
51

52  
53 Another important component has been the adaptation of collaborative methods to sustain the  
54 engagement of experienced front-line service providers and managers, such as bringing them  
55 together to share learnings. Together with sustained investment, the shared commitment and  
56  
57  
58  
59  
60

1  
2  
3 enthusiastic engagement in CQI in the NT is likely to have engendered the sense of collective  
4 efficacy and collective valuing of CQI data that has led to the effectiveness of CQI.[10]  
5  
6

7  
8 An important limitation of our study is that it is not possible to determine clearly the extent to  
9 which trends in data on quality of care have been influenced by policy support for the ABCD  
10 CQI program or to other initiatives (e.g. funding, workforce or infrastructure developments).  
11 The difficulty of demonstrating causality is common to much policy research,[22] however  
12 we argue here for contribution rather than attribution. Improvements to the quality of care in  
13 NT built on substantial earlier initiatives, including electronic patient information record  
14 systems, the development and implementation of a Chronic Disease Strategy and sustained  
15 commitment to workforce development. The ABCD data are not representative of all  
16 Indigenous PHC services. There was variable participation in different jurisdictions and by  
17 government-operated and community-controlled health services. For example, in the NT  
18 there were substantial numbers of both service types participating in ABCD, but relatively  
19 low numbers of community-controlled services in Queensland. The ABCD data need to be  
20 interpreted in relation to a range of other CQI activities in Indigenous PHC services over the  
21 period for which data has been reported[9,11]. While there were some substantial initiatives,  
22 particularly in the NT and Queensland, most CQI initiatives were small scale, narrow in  
23 scope and without the capability to analyze and report consistent data to the extent possible  
24 through ABCD. Nor has it been possible to assess systematically these CQI activities or their  
25 impact on quality of care. In addition, there were a range of non-CQI initiatives at the  
26 national [e.g. Indigenous Chronic Disease Package [23] and local levels, which may have  
27 impacted on quality of care over the period for which we have reported data.  
28  
29  
30  
31  
32  
33  
34  
35  
36  
37  
38  
39  
40  
41  
42

43 The authors of this paper have all had longstanding involvement with the ABCD Program as  
44 researchers, service providers, managers or policy makers/advisors. While our interest in  
45 ABCD may have influenced our interpretation of the data, the diversity of roles, insights and  
46 perspectives that we bring allows for critical reflection in the interpretation of the data, and  
47 brings rigor to this type of research.[22]  
48  
49  
50  
51

52  
53 The ABCD experience, as reflected in this paper, has important implications for practice,  
54 policy and further research, including the implementation of the National CQI Framework for  
55 Aboriginal and Torres Strait Islander PHC.[9] For clinical staff and management of health  
56 services, the benefits of participating in this type of collaborative program include access to a  
57  
58  
59  
60

1  
2  
3 CQI system that provides data on recent performance and trend data across the broad scope  
4 of primary care, and the ability to benchmark against other services at the regional,  
5 state/territory and national level. For policy professionals, benefits include the ability to  
6 monitor adherence to best practice guidelines at all levels, and to target improvements to  
7 specific aspects or modes of care, [19] population groups (e.g. children or the elderly) or  
8 geographic locations. An important challenge for ongoing and new CQI initiatives is to  
9 enhance local ownership and engagement, while ensuring the use of standard tools and  
10 supporting the analytical capability that enables the use of consistent good quality data for  
11 CQI purposes at multiple levels of the system. Sustaining efforts to deliver the best care  
12 according to changing evidence over time remains important and warrants further attention.  
13  
14  
15  
16  
17  
18  
19  
20

## 21 **CONCLUSION**

22  
23 Our study adds to the accumulating evidence on the conditions that enable CQI efforts to be  
24 most effective. The findings show the potential contribution that systematic and sustained  
25 policy and infrastructure support can make to wide-scale uptake and to the effectiveness of  
26 CQI methods in improving the quality of care. It is now about 10 years since our first  
27 published paper on the potential for CQI to enhance the quality of health care for Indigenous  
28 Australians. With the development of a National CQI Framework in 2015 [9] it appears we  
29 may be at the dawn of a new era of wide-scale and systematic use of CQI methods. While  
30 local efforts are vital to the effective use of CQI methods, state/territory-level policy and  
31 resources will be critical to building capability and a supportive environment.  
32  
33  
34  
35  
36  
37  
38  
39

## 40 **List of abbreviations**

41 ABCD: Audit and Best Practice in Chronic Disease

42 CQI: Continuous Quality Improvement

43 PHC: Primary Health Care

44 nKPI: National Key Performance Indicators

45 NSW: New South Wales

46 NT: Northern Territory

47 QCI: Quality of Care Index

48 SA: South Australia  
49  
50  
51  
52  
53  
54  
55  
56  
57  
58  
59  
60

1  
2  
3 WA: Western Australia  
4  
5  
6  
7

## 8 **Consent for publication**

9  
10 Not applicable  
11  
12

## 13 **Availability of data and material**

14  
15  
16 The ABCD dataset analyzed during the current study is not publicly available due to health  
17 centre confidentiality, but is available from the corresponding author on reasonable request  
18 and if consistent with the project's ethics approvals.  
19  
20  
21

## 22 **Authors' contributions**

23  
24  
25 RB conceived and had the primary role in drafting of the manuscript. VM undertook the  
26 quantitative data analysis and had a major role in drafting and review. All other authors (SL,  
27 ST, CP, TW, JB, FC, RK, LC) played substantial roles in providing information on QI  
28 initiatives in various states and territories, in analysis and interpretation of data, and review of  
29 successive drafts of the manuscript. All authors read and approved the final manuscript.  
30  
31  
32  
33  
34

## 35 **Competing interests**

36  
37  
38 RB was the Scientific Director of One21seventy, a not-for-profit entity within Menzies  
39 School of Health Research that provided CQI support on a fee for service basis to primary  
40 healthcare services across Australia. RB is also the lead investigator on the ABCD Research  
41 Program, and other authors are co-investigators. None of the authors received financial  
42 support from One21seventy, and One21seventy did not provide any financial support for the  
43 preparation of this manuscript. The authors have no other competing interests in the  
44 preparation of this manuscript.  
45  
46  
47  
48  
49  
50

## 51 **Acknowledgements**

52  
53 The development of this manuscript would not have been possible without the active support,  
54 enthusiasm and commitment of staff in participating primary health care services, and  
55  
56  
57  
58  
59  
60

1  
2  
3 members of the ABCD National Research Partnership and the Centre for Research  
4 Excellence in Integrated Quality Improvement.  
5  
6  
7  
8  
9

## 10 **Funding**

11 The National Health and Medical Research Council has funded the ABCD National Research  
12 Partnership Project (#545267) and the Centre for Research Excellence in Integrated Quality  
13 Improvement (#1078927). In-kind and financial support has been provided by the Lowitja  
14 Institute and a range of Community-Controlled and Government agencies.  
15  
16  
17  
18  
19

## 20 **Ethics**

21 Ethics approval was obtained from human research ethics committees (HRECs) in each  
22 jurisdiction: Northern Territory HREC-EC00153 & HREC-12-53; New South Wales  
23 HREC/11/GWAHS/23; Queensland HREC/11/QTDD/47; South Australia Aboriginal Health  
24 Research Ethics Committee 04-10-319; Western Australia Curtin University HR140/2008;  
25 WA Country Health Services 2011/27; WA Aboriginal Health Information and Ethics  
26 Committee 111-8/05; University of Western Australia RA/4/1/5051.  
27  
28  
29  
30  
31  
32

## 33 **REFERENCES**

- 34  
35  
36 1. Grol R, Grimshaw J. From best evidence to best practice: effective implementation of  
37 change in patients' care. *Lancet*. 2003;362(9391):1225-30.  
38  
39 2. Tricco A, Ivers N, Grimshaw J, et al. Effectiveness of quality improvement strategies  
40 on the management of diabetes: a systematic review and meta-analysis. *Lancet*.  
41 2012;379(9833)2252-61.  
42  
43 3. Bailie R, Si D, Shannon C, et al. Study protocol: national research partnership to  
44 improve primary health care performance and outcomes for Indigenous peoples. *BMC*  
45 *Health Serv Res*. 2010;10(1):1.  
46  
47 4. Si D, Bailie R, Dowden M, et al. Assessing quality of diabetes care and its variation  
48 in Aboriginal community health centres in Australia. *Diabetes Metab Res Rev*.  
49 2010;26(6):464-73.  
50  
51 5. Australian Institute of Health and Welfare. The Health and Welfare of Australia's  
52 Aboriginal and Torres Strait Islander Peoples 2015. Cat. no. IHW 147. Canberra:  
53 AIHW.2015.  
54  
55  
56  
57  
58  
59  
60

- 1
- 2
- 3 6. Lau R, Stevenson F, Ong B, et al. Achieving change in primary care—causes of the
- 4 evidence to practice gap: systematic reviews of reviews. *Implement Sci.* 2016;11(1):1.
- 5
- 6 7. Ferlie E, Shortell S. Improving the quality of health care in the United Kingdom and
- 7 the United States: a framework for change. *Milbank Q.* 2001;79(2):281-315.
- 8
- 9 8. Epping-Jordan J, Pruitt S, Bengoa R, Wagner EH. Improving the quality of health
- 10 care for chronic conditions. *Qual Safety Health Care.* 2004;13(4):299-305.
- 11
- 12 9. Lowitja Institute. Draft Final Report: Recommendations for a National CQI
- 13 Framework for Aboriginal and Torres Strait Islander Primary Health Care.
- 14 2014;prepared for the Commonwealth Department of Health, Canberra.
- 15
- 16 10. Schierhout G, Hains J, Si D, et al. Evaluating the effectiveness of a multifaceted,
- 17 multilevel continuous quality improvement program in PHC: developing a realist
- 18 theory of change. *Implement Sci.* 2013;8:119.
- 19
- 20 21
- 22 11. Wise M, Angus S, Harris E, Parker S. Appraisal of Continuous Quality Improvement
- 23 Initiatives in Aboriginal and Torres Strait Islander Primary Health Care.
- 24 2013;Prepared for the Lowitja Institute, Melbourne.
- 25
- 26 12. Matthews V, Schierhout G, McBroom J, et al. Duration of participation in continuous
- 27 quality improvement: a key factor explaining improved delivery of Type 2 diabetes
- 28 services. *BMC Health Serv Res.* 2014;14(1):1.
- 29
- 30 13. Allen and Clark. Evaluation of the Northern Territory CQI Investment Strategy,
- 31 Department of Health 2013, Canberra.
- 32
- 33 14. Gardner KL, Dowden M, Togni S, Bailie R. Understanding uptake of continuous
- 34 quality improvement in Indigenous primary health care: lessons from a multi-site case
- 35 study of the Audit and Best Practice for Chronic Disease project. *Implement Sci.*
- 36 2010;5(1):1.
- 37
- 38 15. Bailie C, Matthews V, Bailie J, et al. Determinants and gaps in Preventive care
- 39 Delivery for Indigenous Australians: a cross-sectional analysis. *Front. Public Health.*
- 40 2016;4.
- 41
- 42 16. Larkins S, Woods CE, Matthews V, et al. Responses of Aboriginal and Torres Strait
- 43 Islander Primary health-care Services to Continuous Quality Improvement Initiatives.
- 44 *Front. Public health.* 2015;3.
- 45
- 46 17. Gibson-Helm M, Rumbold A, Teede H, et al. Improving the provision of pregnancy
- 47 care for Aboriginal and Torres Strait Islander women: a continuous quality
- 48 improvement initiative. *BMC Pregnancy and Childbirth.* 2016;16(1):1.
- 49
- 50 18. Vasant B, Matthews V, Burgess C, et al. Wide Variation in absolute cardiovascular
- 51 risk assessment in Aboriginal and Torres Strait Islander People with Type 2 Diabetes.
- 52 *Front. Public Health.* 2016;4.
- 53
- 54
- 55
- 56
- 57
- 58
- 59
- 60

- 1  
2  
3 19. Schierhout G, Matthews V, Connors C, et al. Improvement in delivery of type 2  
4 diabetes services differs by mode of care: a retrospective longitudinal analysis in the  
5 Aboriginal and Torres Strait Islander Primary Health Care setting. *BMC Health Serv*  
6 *Res.* 2016;16(1):560.  
7
- 8  
9 20. Australian Institute of Health and Welfare 2014. National Key Performance Indicators  
10 for Aboriginal and Torres Strait Islander primary health care: first national results  
11 June 2012 to June 2013. National key performance indicators for Aboriginal and  
12 Torres Strait Islander primary health care series. Cat no. IHW 123. Canberra: AIHW.  
13
- 14 21. Australian Institute of Health and Welfare 2015. National Key Performance Indicators  
15 for Aboriginal and Torres Strait Islander primary health care: results from December  
16 2014. National key performance indicators for Aboriginal and Torres Strait Islander  
17 primary health care series no.3. Cat. no. IHW 161. Canberra: AIHW.  
18
- 19 22. Walt G, Shiffman J, Schneider H, et al. 'Doing' health policy analysis:  
20 methodological and conceptual reflections and challenges. *Health Policy and*  
21 *Planning.* 2008;23(5):308-17.  
22
- 23 23. Bailie R, Griffin J, Kelaher M, et al. Sentinel sites evaluation: final report. Report  
24 prepared by Menzies School of Health Research for the Australian Government  
25 Department of Health and Ageing, Canberra. 2013.  
26
- 27 24. Laycock A, Bailie J, Matthews V, Bailie R. Interactive dissemination: engaging  
28 stakeholders in the use of aggregated quality improvement data for system-wide  
29 change in Australian Indigenous primary health care. *Frontiers in public health.*  
30 2016;4.  
31
- 32 25. Cunningham F, Ferguson-Hill S, Matthews V, Bailie R. Leveraging quality  
33 improvement through use of the Systems Assessment Tool in Indigenous primary  
34 health care services: a mixed methods study. *BMC Health Serv Res.* 2016 Oct  
35 18;16(1):583.  
36  
37  
38  
39  
40  
41  
42  
43  
44  
45  
46  
47  
48  
49  
50  
51  
52  
53  
54  
55  
56  
57  
58  
59  
60



1  
2  
3  
4  
5  
6  
7  
8  
9  
10  
11  
12  
13  
14  
15  
16  
17  
18  
19  
20  
21  
22  
23  
24  
25  
26  
27  
28  
29  
30  
31  
32  
33  
34  
35  
36  
37  
38  
39  
40  
41  
42  
43  
44  
45  
46  
47  
48  
49  
50  
51  
52  
53  
54  
55  
56  
57  
58  
59  
60

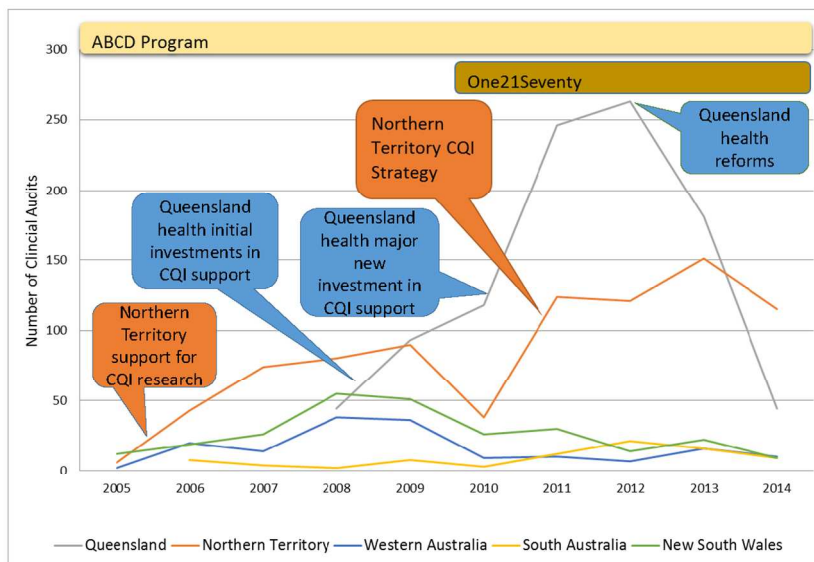

Uptake of ABCD CQI and major policy influences on trends in Northern Territory and Queensland

338x190mm (111 x 111 DPI)

review only

### Additional File 1: Clinical audit process, sample size and audit inclusion criteria

**Conduct and reporting of clinical audits** – audits were generally done by health service staff, trained in the use of standard tools and supported by quality improvement facilitators and continuous quality improvement (CQI) program staff. Where appropriate health service staff were not available, the audits were done by trained CQI facilitators working in state/territory CQI support roles. Data were collected using standardised CQI tools, entered into a web-based information system, and analysed through an automated process, with reports made available to health services in real time for use in local quality improvement processes. Reports of aggregated data for clusters of health services, by region or state, were also available through the web-based information system to support regional or state/territory level CQI efforts.

**Sampling and sample size** for Preventive care, Diabetes, Maternal and Child health audits. Where the eligible population was 30 clients or less, the audit protocol recommended including all records. Where the eligible population was greater than 30, the protocol provided guidance on the random selection of records, with the number depending on the precision of estimates required by health service staff. A new sample was used for each audit period. For Preventive care and Child health, the samples were stratified by age and gender; for Diabetes care samples were stratified by gender.

| <b>Preventive care</b>                                                                                                                                                                                                                                                                                                                       | <b>Diabetes</b>                                                                                                                                                                                                                                                                              | <b>Child health</b>                                                                                                                                                                                                                                                                                                        | <b>Maternal health</b>                                                                                                                                                                                                |
|----------------------------------------------------------------------------------------------------------------------------------------------------------------------------------------------------------------------------------------------------------------------------------------------------------------------------------------------|----------------------------------------------------------------------------------------------------------------------------------------------------------------------------------------------------------------------------------------------------------------------------------------------|----------------------------------------------------------------------------------------------------------------------------------------------------------------------------------------------------------------------------------------------------------------------------------------------------------------------------|-----------------------------------------------------------------------------------------------------------------------------------------------------------------------------------------------------------------------|
| Included clients must: be between 15 and up to 55 years; have no diagnosis of diabetes, hypertension, coronary heart disease, chronic heart failure, rheumatic heart disease or chronic kidney disease; not be pregnant or less than 6 weeks postpartum; and have been resident in the community for 6 months or more in the last 12 months. | Included clients must: have a clear, documented diagnosis of Type 2 Diabetes; be 15 years or older; and have been a resident in the community for 6 months or more in the last 12 months. Clients are excluded if they have Type 1 diabetes, gestational diabetes or autoimmune nephropathy. | Included children must: have been resident in the community for 6 months or more of the past 12 months (or if the child is <12 months, resident in the community for at least half of the time since birth); and have no major health anomaly such as Down Syndrome, cerebral palsy, heart defects or inherited disorders. | Included women must: have an infant between 2 and 14 months; have been resident in the community for 6 months of the infant's gestation; and have used the health service as the usual source of primary health care. |

## Additional File 2 – Quality of Care Index for preventive care, diabetes care, child health and maternal health care, 2005–2014

### Reading the box plots

The box plots show the median, mean, 25th and 75th centile and range between health services for each jurisdiction, year and audit cycle. They also show outliers, defined as health services where the value for the indicator is more than 1.5 times the difference between the 25th and 75th centile from the median.

### Preventive care (2005–2014)

QCI includes (up to 15 service items): weight, waist circumference, blood pressure, urinalysis, blood glucose levels, oral health check, nutrition & physical activity brief intervention, smoking & alcohol use recorded and brief interventions where required, sexually transmitted infection check (gonorrhoea, chlamydia & syphilis) and pap smear.

### Northern Territory

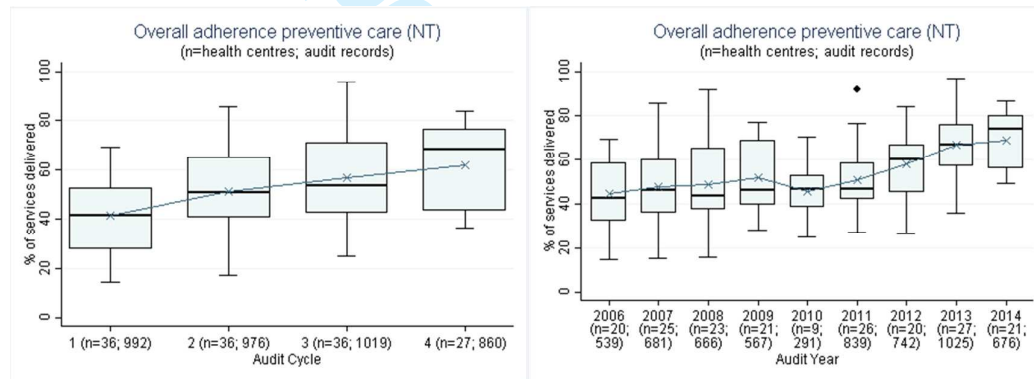

### Queensland

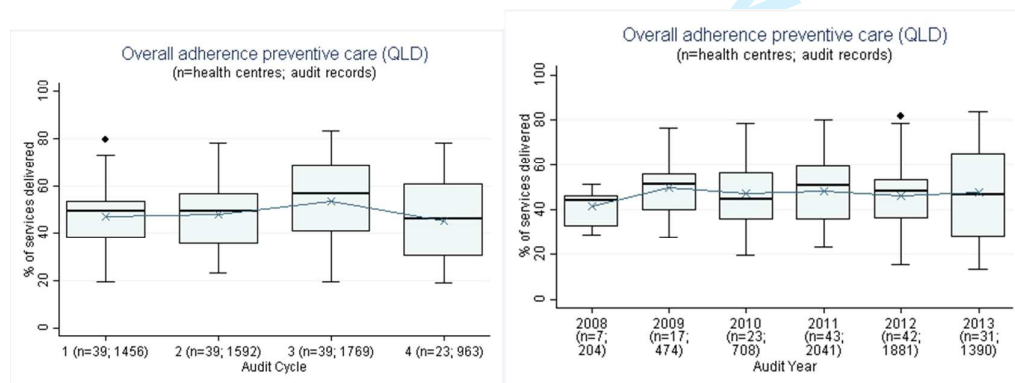

Figure 2.1: Mean percent QCI services delivered to well clients per health service, by audit cycle (health services that have at least 3 years of audit data) and by audit year (all health services), NT and Qld (n=number of health services; number of client records audited who attended in previous 24 months)

**Diabetes care (2005–2014)**

QCI includes (up to 22 service items): GP Management Plan, record of discussion on chronic disease management & medications, influenza & pneumococcal vaccination, blood pressure, smoking & alcohol use recorded and brief intervention where required, weight, waist circumference, nutrition & physical activity brief intervention, ACR, lipids, cholesterol, eGFR, body mass index, visual acuity, dilated eye check, feet check, HbA1c.

Northern Territory

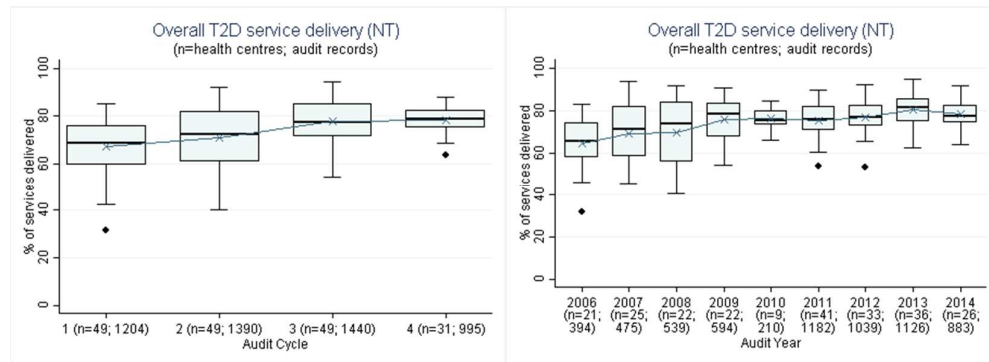

Queensland

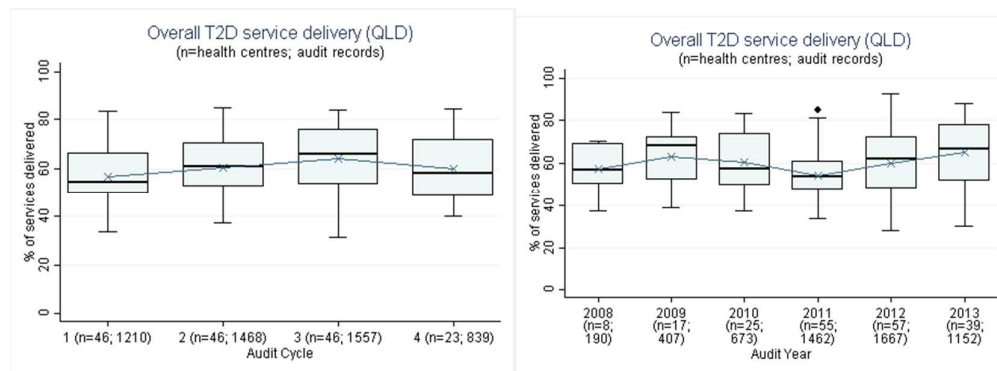

Figure 2.2: Mean percent QCI services delivered to patients with Type 2 diabetes per health service, by audit cycle (health services that have at least 3 years of audit data) and by audit year (all health services), NT and Qld (n=number of health services; number of client records audited who attended in previous 12 months)

### Child health (2007–2014)

QCI includes up to 10 service items: weight, height, ear exam, nutrition, head circumference, hip exam, sudden infant death syndrome prevention advice, breastfeeding advice, developmental check, testes check.

#### Northern Territory

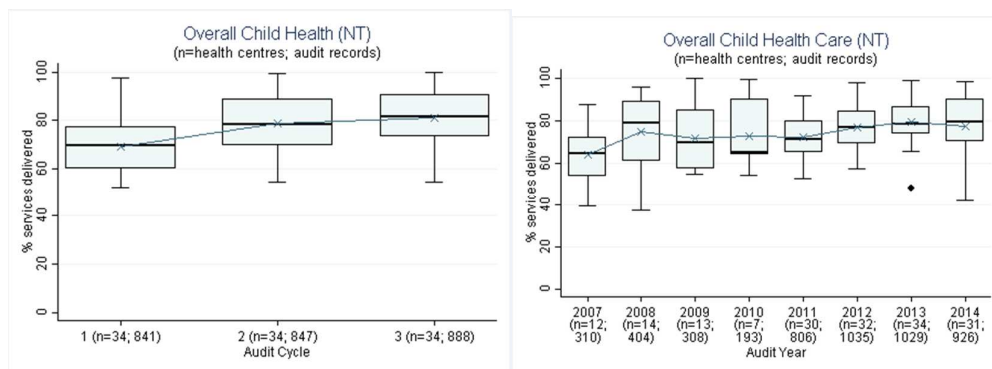

#### Queensland

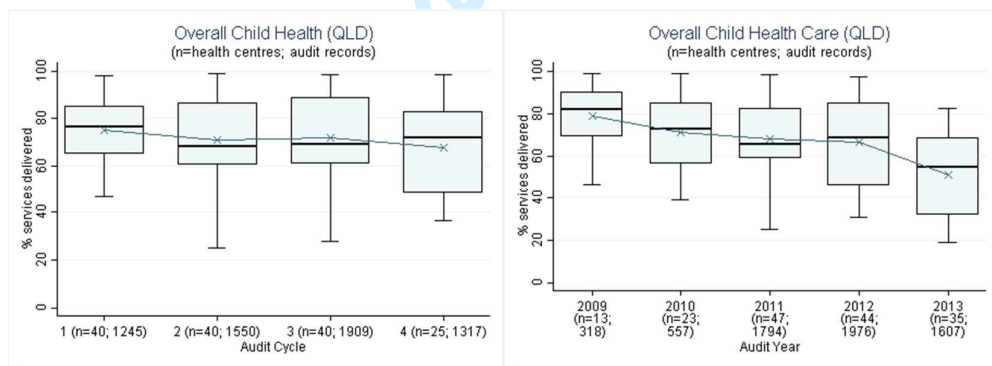

Figure 2.3: Mean percent QCI services delivered to children per health service, by audit cycle (health services that have at least 3 years of audit data) and by audit year (all health services), NT and Qld (n=number of health services; number of child records audited who attended in previous 12 months)

**Maternal health (2007–2014)**

The antenatal QCI includes 26 best practice service items present in the maternal health audit tool:  $\geq 7$  antenatal visits, estimated gestational age  $\leq 13$  weeks at first antenatal visit, blood pressure (1st, 2nd & 3rd trimester), urinalysis (1st & 2nd trimester), BMI (1st trimester), fundal height (2nd & 3rd trimester), fetal movements (3rd trimester), blood glucose (2nd trimester), documentation of blood group, antibody status, rubella, Hepatitis B status, mid-stream urine, full blood examination, Syphilis serology, HIV, PCR test, smoking and alcohol use status recorded (1st & 3rd trimester), social risk and emotional wellbeing assessments, planning for care and birthing, nutrition, breastfeeding, domestic and social environment, and cultural considerations.

Northern Territory

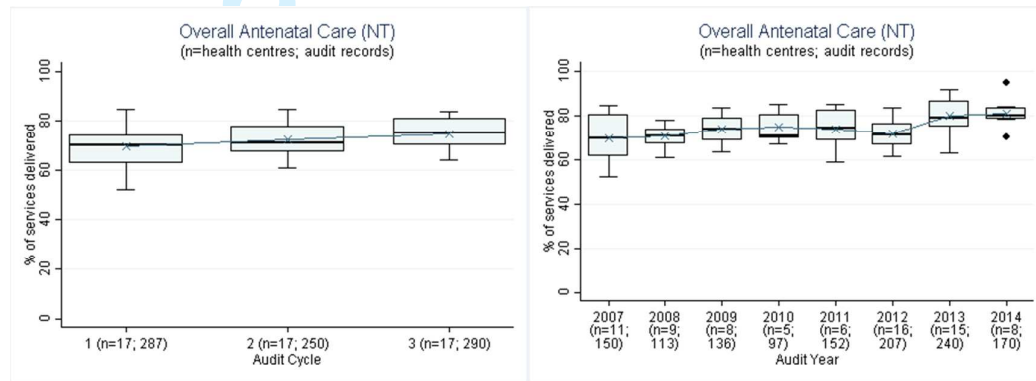

Queensland

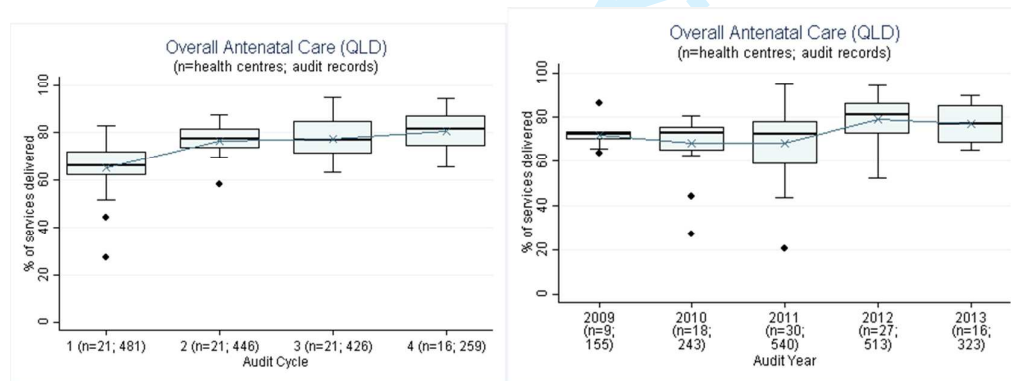

Figure 2.4: Mean percent QCI services delivered to pregnant women per health service, by audit cycle (health services that have at least 3 years of audit data) and by audit year (all health services), NT and Qld (n=number of health services; number of client records audited)

### **Additional File 3 – Detailed description of policy context by state and territory**

#### ***Northern Territory***

In early 2009, a Continuous Quality Improvement (CQI) Strategy was endorsed by the Northern Territory (NT) Aboriginal Health Forum – comprising the Commonwealth Department of Health and Ageing (now Department of Health); the NT Department of Health; and the Aboriginal Medical Service Alliance of the Northern Territory (or AMSANT, the peak community-controlled health service body in the NT) – with the goal of building a consistent approach to CQI across the NT Indigenous primary health care (PHC) sector. The NT CQI Strategy was part of a broader Indigenous PHC reform agenda that incorporated the Expanded Health Service Delivery Initiative (EHSDI),<sup>[1]</sup> which included a substantial increase in funding and an expansion of remote PHC services, a program of regionalization, and the development of key performance indicators (KPIs). The Strategy built on a history of leadership and innovation in Indigenous PHC, including in relation to community control of PHC services, the development and implementation of a Chronic Disease Strategy, guideline development, electronic information systems, and chronic disease management, as well as on the Audit and Best Practice in Chronic Disease (ABCD) CQI work which originated in the NT in 2002.<sup>[1,2]</sup>

The CQI Strategy included: i) establishment of a Steering Committee (made up of representatives from each of the three organizations' in the Aboriginal Health Forum); ii) engagement of two CQI Coordinators to provide leadership, advice and training; iii) funding to support CQI Facilitators in each Health Service Delivery Area of the NT; and iv) support for regular CQI Collaborative meetings. By the end of 2012 there were 16 facilitator positions across the NT, and more than 200 health professionals, including 25 Aboriginal Health Workers, had been trained in the use of CQI tools and processes.<sup>[3]</sup> The CQI Strategy was allocated around \$2.79m per year, with the intention that CQI should be a core PHC activity.<sup>[1]</sup>

The independent evaluation of the NT CQI Strategy <sup>[1]</sup> found that it 'had been successful in establishing the practice of quality improvement across the NT Aboriginal PHC system... to build the beginnings of a system-wide culture of quality improvement'. The Strategy was found to have resulted in an increase in 'overall CQI capability and capacity', 'enthusiasm and fervor among health workers for quality improvement', 'wide engagement of health service managers and clinicians in CQI activities' and had contributed to 'staff becoming adept at using ePIRS (electronic Patient Information Record Systems) and the data in these systems being improved'. The evaluation highlighted the ABCD CQI tools as providing a 'solid technical basis for CQI' and 'technical rigor behind the approach', and developing routine clinical information systems to generate and regularly report on agreed Indigenous health KPIs to NT Government-operated services. Under the guidance of the CQI Steering Committee, the NT provided national leadership in developing specialized infrastructure support and workforce capacity for wide-scale implementation of CQI.<sup>[3]</sup>

#### ***Queensland***

In 2005–2006, the Queensland Government undertook a review both of the readiness of services to commence CQI and of the evidence as to its effectiveness in improving health care delivery. This provided a foundation for subsequent investment.

1  
2  
3 Following the lead of the NT, in 2007–2008 Queensland Health appointed a CQI Coordinator  
4 and regional facilitators to support the implementation of CQI processes in Indigenous PHC  
5 services as part of ABCD. A restructure in 2008 provided a key leverage point, and change  
6 through reform, as the funding for CQI was expanded from north Queensland specific to  
7 state-wide. A North Queensland CQI Steering committee was established in 2008 with key  
8 stakeholders, including Royal Flying Doctor Service, Apunipima Cape York Health Council  
9 and Queensland Health. There was a further investment in CQI in 2010, including a contract  
10 with One21seventy to provide CQI support to Indigenous health services.  
11

12  
13 In 2011, Queensland Health established a state-wide Primary Health Care CQI Steering  
14 Committee and a team with responsibility for CQI in Indigenous health services.[3] The team  
15 included two coordinators and 12 locally based facilitators, whose task was to develop and  
16 implement a coordinated CQI approach using One21seventy tools and processes with a focus  
17 on supporting Queensland Health services, although this support and access to One21seventy  
18 was available to Aboriginal Community Controlled Health Services (ACCHSs) as well. CQI  
19 was included in the Queensland Chronic Disease Guidelines, and the section on CQI was  
20 strengthened in 2008. This CQI initiative was part of the Queensland Chronic Disease  
21 Strategy and was supported by the Making Tracks Policy and Accountability Framework for  
22 improving health outcomes for Indigenous people (funded through Australian Government  
23 ‘Closing the Gap’ funding.[4]  
24  
25

26 By late 2012, the CQI team established by the Queensland Health initiative was supporting  
27 75 services across the state to conduct CQI, with engagement of other service organizations  
28 in addition to those managed by Queensland Health. This work aligned with the development  
29 of evidence-based clinical guidelines, and orientation and training packages.[3] The  
30 infrastructure and policy support for CQI provided by Queensland Health was adversely  
31 affected by changes in the policy environment, with budget cuts and health reforms following  
32 the implementation of regionalization through the *Queensland Health and Hospitals Network  
33 Act 2011* and the change of government in Queensland in 2012. Contracts for CQI support  
34 and tools through One21seventy were discontinued and there was a loss of dedicated CQI  
35 support positions throughout the state.  
36  
37

38 Other significant CQI work in Queensland included a partnership between the state’s peak  
39 Indigenous health body, Queensland Aboriginal and Islander Health Council, and a state-  
40 based general practice organization that used collaborative-style methods, supported by  
41 implementation of an electronic clinical information system. A report for 2009-2010 showed  
42 high performance on a number of indicators, with wide variation between services on  
43 others.[5] In 2011 it was reported that 13 of the 21 Aboriginal Community Controlled Health  
44 Services were participating.[3]  
45  
46

47 Other Indigenous health organizations’ have used CQI methods for clinical governance  
48 purposes at a regional level in recent years, for example Apunipima Cape York Health  
49 Council and Institute of Urban Indigenous Health.  
50

### 51 ***New South Wales***

52

53 In New South Wales (NSW), participation in ABCD commenced in 2005, driven primarily  
54 by the initiative and resources of a regional ACCHS, Maari Ma Health Aboriginal  
55 Corporation, which used the CQI process to support and evaluate implementation of its  
56 Chronic Disease Strategy. This organization has gone on to integrate a systems-oriented CQI  
57 approach into the ongoing management of its service.[6]  
58  
59  
60



1  
2  
3 While NSW Health showed some interest in supporting engagement with ABCD more  
4 widely, there was no specific policy or funding support provided to services for their  
5 participation. However, several NSW-based ACCHSs and other PHC organizations' (such as  
6 Divisions of General Practice) used the ABCD tools through engaging with One21seventy.  
7 NSW Health funded the state's peak Indigenous health body, the Aboriginal Health and  
8 Medical Research Council (AHMRC), to support its member services with CQI activities  
9 through building infrastructure, skills and data collection systems, and to share models of  
10 good practice in CQI in the Indigenous PHC context. In 2015 the AHMRC produced web-  
11 based resources and a DVD describing success stories in 10 NSW ACCHSs, reflecting the  
12 use of a variety of tools, processes and approaches to CQI. Other than for those services  
13 participating in the ABCD program, or for a relatively small number of selected indicators  
14 available through national KPIs reporting, there appears to be no publicly available reports on  
15 clinical performance for Indigenous PHC services in NSW.  
16  
17

### 18 *Western Australia*

19  
20 In Western Australia (WA), the state government provided some funding for a project officer  
21 to work with the ABCD program between 2005 and 2009, but there was no clear policy or  
22 infrastructure to encourage engagement by PHC services. Continued engagement with the  
23 ABCD Program over 2010-2014 was supported by a project officer funded through the  
24 Lowitja Institute. Participation was heavily reliant on the initiative of individual services and  
25 the support of a small research team based with one of ABCD's academic partner  
26 organizations' and on the national ABCD project network. While some services were  
27 encouraged to use ABCD tools and processes through their participation in the national  
28 Healthy for Life program, there were inadequate resources to support the use of CQI tools  
29 and processes among services distributed across the vast distances of WA.  
30  
31

32 Concurrent with the early implementation of ABCD in WA, the Aboriginal Health Council of  
33 WA (AHCWA) in 2006 implemented the Australian Primary Care Collaboratives program  
34 (referred to then as the National Primary Care Collaborative or NPCC) in seven selected  
35 sites. An evaluation of this initiative in mid-2007 reported that 'the central notions of quality  
36 improvement had been introduced' and that 'systems were in place to varying degrees',  
37 which created 'the potential to improve the way in which chronic health needs are addressed'.  
38  
39

40 However, the evaluation also noted that 'it was clear that there was a need for the NPCC  
41 Program to be more responsive to the needs and desires of specific ACCHSs'. While  
42 participating services were reported to be satisfied with the NPCC program, they were 'less  
43 enthusiastic about the program continuing', or its roll-out to other ACCHSs.[7]  
44

45 Between 2012 and 2015, AHCWA engaged in a research partnership that had an initial focus  
46 on conducting a systematic review of the effectiveness of CQI programs in PHC settings in  
47 Indigenous and ethnic minority populations, and identifying common elements among  
48 programs with improved outcomes.[8]. There appear to be no publicly available reports on  
49 subsequent work arising from the AHCWA-Australian National University research  
50 partnership.  
51  
52

53 A review of WA Health Programs in 2014 argued for the implementation of a state-wide  
54 system for CQI with 'transparent measurements, accountable comparisons and resultant  
55 action plans', with specific reference to the evidence base developed by the ABCD Program  
56 and the benefits of adopting the One21seventy system.[9] In 2014-15, AHCWA  
57  
58  
59  
60

1  
2  
3 acknowledged the generally low capacity for CQI in the state, and reported the organization  
4 had begun actively promoting CQI to all member services.[10]  
5

6 Five member services were reported to be engaged in CQI activities with a focus on health  
7 checks, smoking, otitis media and sexually transmitted infections. There is evidence that at  
8 least some local WA Indigenous PHC services had made substantial strides in the  
9 management of conditions such as Type 2 diabetes over the previous decade, [11] and in the  
10 development of local CQI systems more recently.[12]  
11

### 12 *South Australia*

14 Engagement of PHC services with the ABCD program in South Australia (SA) commenced  
15 in 2006, with a few services using the ABCD tools on their own initiative. The SA State  
16 Government provided policy and funding support to the ABCD National Research  
17 Partnership between 2010-2014, with additional funding provided by the Lowitja Institute for  
18 a research officer to work closely with the Aboriginal Health Council of South Australia  
19 (AHCSA) as both a researcher and coordinator for participating ACCHSs. By 2012, in  
20 addition to 10 ACCHSs, there were five state government-run health services using ABCD  
21 CQI tools and processes on a pilot basis, supported in various ways by their Local Health  
22 Networks.[13]  
23  
24

25 Policy support in SA was relatively limited and the implementation and ongoing CQI support  
26 to PHC services relied heavily on the small team based at AHCSA, and the ABCD project  
27 network. Research on PHC professionals' perspectives on barriers and enablers to CQI in the  
28 SA context identified health workforce capability - including the availability of CQI  
29 coordinator support – and senior management and leadership support for CQI as being vital  
30 to effective implementation. Organizational systems and individual behavior change, with  
31 regional collaborations and the use of systems approaches, were identified as key  
32 requirements for successful and sustained implementation of CQI.[13]  
33  
34

### 35 *References:*

- 36 1. Allen and Clark. Evaluation of the Northern Territory Continuous Quality  
37 Improvement Investment Strategy, 2013, Department of Health, Canberra.
- 38 2. Bailie RS, Si D, Robinson GW, Togni SJ, d Abbs PH. A multifaceted health-service  
39 intervention in remote Aboriginal communities: 3-year follow-up of the impact on  
40 diabetes care. Medical Journal of Australia. 2004 Aug 16;181:195-200.
- 41 3. Wise M, Angus S, Harris E, Parker S. Appraisal of Continuous Quality Improvement  
42 Initiatives in Aboriginal and Torres Strait Islander Primary Health Care. 2013,  
43 Lowitja Institute, Melbourne.
- 44 4. Queensland Health: Making Tracks towards closing the gap in health outcomes for  
45 Indigenous Queenslanders by 2033 – policy and accountability framework, Brisbane  
46 2010.
- 47 5. Panaretto KS, Gardner KL, Button S, Carson A, Schibasaki R, Wason G, et al.  
48 Prevention and management of chronic disease in Aboriginal and Islander  
49 Community Controlled Health Services in Queensland: a quality improvement study  
50  
51  
52  
53  
54  
55  
56  
57  
58  
59  
60

1  
2  
3 assessing change in selected clinical performance indicators over time in a cohort of  
4 services. BMJ Open. 2013 Jan 1;3(4):e002083.

- 5  
6  
7 6. Maari Ma Health Aboriginal Corporation. Annual Report 2015/2015, Maari Ma  
8 Health Corporation, 2016.
- 9  
10 7. Smith P. Thirdforce Consultancy Services. Evaluation Report of the Aboriginal  
11 Health Council of Western Australia's Implementation of the National Primary Health  
12 Care Collaboratives Program, September 2007.
- 13  
14 8. Australian Primary Health Care Research Institute. [Internet] Systematic review of  
15 continuous quality improvement in Indigenous primary health care organisations.  
16 [cited 9<sup>th</sup> Dec 2016]. Available from:  
17 [http://aphcri.anu.edu.au/aphcrianu/projects/systematic-review-continuous-quality-](http://aphcri.anu.edu.au/aphcrianu/projects/systematic-review-continuous-quality-improvement-indigenous-primary-health-care)  
18 [improvement-indigenous-primary-health-care](http://aphcri.anu.edu.au/aphcrianu/projects/systematic-review-continuous-quality-improvement-indigenous-primary-health-care)  
19
- 20  
21 9. Holman CDJ, Joyce SJ. A Promising Future: WA Aboriginal Health Programs.  
22 Review of performance with recommendations for consolidation and advance.  
23 December 2014, Department of Health Western Australia, Perth.
- 24  
25 10. Aboriginal Health Council of Western Australia, Annual Report 2014 – 2015,  
26 AHCWA, Highgate.
- 27  
28 11. Marley JV, Nelson C, O'Donnell V, Atkinson D. Quality indicators of diabetes care:  
29 an example of remote-area Aboriginal primary health care over 10 years. Medical  
30 Journal of Australia. 2012 Oct 1;197(7):404.
- 31  
32 12. Stoneman A, Atkinson D, Davey M, Marley JV. Quality improvement in practice:  
33 improving diabetes care and patient outcomes in Aboriginal Community Controlled  
34 Health Services. BMC health services research. 2014 Oct 7;14(1):1.
- 35  
36  
37  
38 13. Newham J, Schierhout G, Bailie R, Ward PR. 'There's only one enabler; come up,  
39 help us': staff perspectives of barriers and enablers to continuous quality  
40 improvement in Aboriginal primary health-care settings in South Australia. Australian  
41 Journal of Primary Health. 2015 Feb 27.
- 42  
43  
44  
45  
46  
47  
48  
49  
50  
51  
52  
53  
54  
55  
56  
57  
58  
59  
60

**Additional File 4: Estimated effect of jurisdictional location on care quality (% increase in services) for each area of care\***

|                                    | <b>Preventive Health</b><br>(n=75 services;<br>9,627 audit records) |                |                 | <b>Type 2 Diabetes</b><br>(n=95; 10,103) |                |                 |
|------------------------------------|---------------------------------------------------------------------|----------------|-----------------|------------------------------------------|----------------|-----------------|
|                                    | <b>Coef</b>                                                         | <b>p-value</b> | <b>95% CIs</b>  | <b>Coef</b>                              | <b>p-value</b> | <b>95% CIs</b>  |
| Audit Year                         | 4.23                                                                | <0.0001        | (3.22 - 5.23)   | 2.44                                     | <0.0001        | (1.84 - 3.04)   |
| Audit Cycle                        | -1.14                                                               | 0.08           | (-2.43 - 0.15)  | 0.64                                     | 0.12           | (-0.17 - 1.45)  |
| Jurisdiction<br>(QLD<br>reference) | 11.66                                                               | <0.0001        | (5.61 - 17.70)  | 15.73                                    | <0.0001        | (11.87 - 19.58) |
| LRTest chi <sup>2</sup><br>(1df)   | 13.65(p=0.0002)                                                     |                |                 | 50.13(p<0.0001)                          |                |                 |
| VPC                                | 17.0%                                                               |                |                 | 18.2%                                    |                |                 |
|                                    | <b>Child Health</b><br>(n=74; 6,724)                                |                |                 | <b>Maternal Health</b><br>(n=38; 2,180)  |                |                 |
|                                    | <b>Coef</b>                                                         | <b>p-value</b> | <b>95% CIs</b>  | <b>Coef</b>                              | <b>p-value</b> | <b>95% CIs</b>  |
| Audit Year                         | 0.67                                                                | 0.28           | (-0.53-1.87)    | -0.97                                    | 0.025          | (-1.82 - -0.12) |
| Audit Cycle                        | 0.74                                                                | 0.37           | (-0.89 - 2.36)  | 6.10                                     | <0.0001        | (4.78-7.42)     |
| Jurisdiction<br>(QLD<br>reference) | 4.98                                                                | 0.07           | (-0.42 - 10.38) | -2.38                                    | 0.27           | (-6.59 - 1.83)  |
| LRTest chi <sup>2</sup><br>(1df)   | 3.22(p=0.07)                                                        |                |                 | 1.22(p=0.27)                             |                |                 |
| VPC                                | 15.0%                                                               |                |                 | 16.6%                                    |                |                 |

\* As measured by the Quality of Care Index (QCI)

Coef = Coefficient

LRTest = Likelihood Ratio Test

VPC = Variance Partition Coefficient

1  
2  
3  
4  
5  
6  
7  
8  
9  
10  
11  
12  
13  
14  
15  
16  
17  
18  
19  
20  
21  
22  
23  
24  
25  
26  
27  
28  
29  
30  
31  
32  
33  
34  
35  
36  
37  
38  
39  
40  
41  
42  
43  
44  
45  
46  
47  
48  
49

| SQUIRE Category                                                          | SQUIRE Explanation                                                                                                                                                                                                                                 | Authors response                                                                                                                                                                                                                                                                                                                                                                                                                                                                                                                                                                                                                                                                                                                                                                                                                                                                                                                                                                                                                                                                                                                                                                                                                                                                              |
|--------------------------------------------------------------------------|----------------------------------------------------------------------------------------------------------------------------------------------------------------------------------------------------------------------------------------------------|-----------------------------------------------------------------------------------------------------------------------------------------------------------------------------------------------------------------------------------------------------------------------------------------------------------------------------------------------------------------------------------------------------------------------------------------------------------------------------------------------------------------------------------------------------------------------------------------------------------------------------------------------------------------------------------------------------------------------------------------------------------------------------------------------------------------------------------------------------------------------------------------------------------------------------------------------------------------------------------------------------------------------------------------------------------------------------------------------------------------------------------------------------------------------------------------------------------------------------------------------------------------------------------------------|
| <b>Title and Abstract</b>                                                |                                                                                                                                                                                                                                                    |                                                                                                                                                                                                                                                                                                                                                                                                                                                                                                                                                                                                                                                                                                                                                                                                                                                                                                                                                                                                                                                                                                                                                                                                                                                                                               |
| 1. Title                                                                 | Indicate that the manuscript concerns an initiative to improve healthcare (broadly defined to include the quality, safety, effectiveness, patient-centeredness, timeliness, cost, efficiency, and equity of healthcare, or access to it).          | Page 1- The title of the manuscript indicates that it is a comparative case study looking at the impact of policy support on the uptake of CQI activities and the impact on quality of care and the context in which it occurred. <i>“Impact of policy support on uptake of evidence-based continuous quality improvement activities and the quality of care for Indigenous Australians: a comparative case study.”</i>                                                                                                                                                                                                                                                                                                                                                                                                                                                                                                                                                                                                                                                                                                                                                                                                                                                                       |
| 2. Abstract                                                              | <ul style="list-style-type: none"> <li>• Provide adequate information to aid in searching and indexing</li> <li>• Summarize all key information from various sections of the text using the abstract format of the intended publication</li> </ul> | Page 2 - We have structured the abstract as required by BMJ Open using the headings Objectives, Design, Setting, Participants, Interventions, Results and Conclusions.                                                                                                                                                                                                                                                                                                                                                                                                                                                                                                                                                                                                                                                                                                                                                                                                                                                                                                                                                                                                                                                                                                                        |
| <b>Introduction</b>                                                      |                                                                                                                                                                                                                                                    |                                                                                                                                                                                                                                                                                                                                                                                                                                                                                                                                                                                                                                                                                                                                                                                                                                                                                                                                                                                                                                                                                                                                                                                                                                                                                               |
| 3. Problem description and available knowledge<br>4. available knowledge | <ul style="list-style-type: none"> <li>• Nature and significance of the local problem</li> <li>• Summary of what is currently known about the problem, including relevant previous studies</li> </ul>                                              | <p>The introduction clearly identifies the current relevant evidence and the current gap in knowledge.</p> <p>Page 4; Line 5 - <i>“Internationally, there is wide variation in adherence to best practice clinical guidelines between health services and between health professionals.[1] There is a growing body of evidence about the effectiveness of continuous quality improvement (CQI) in increasing adherence to guidelines and on the factors that contribute to this.[2] Variation in quality of care between health services has been demonstrated, including in populations with poorer health status, such as Aboriginal and Torres Strait Islander (hereafter respectfully referred to as Indigenous) peoples in Australia.[3,4]”</i></p> <p>Page 4; Line 43 - <i>“While system-wide approaches to CQI have been associated with achieving large-scale improvements in health outcomes, there is limited evidence of the effectiveness of CQI over an extended period.[2] A positive policy environment is widely recognised as vital for effective development and implementation of programs to prevent and manage chronic disease,[8] with previous cross-regional analyses identifying the importance of regional level policies in enhancing clinical performance</i></p> |

|                                                   |                                                                                                                                                                                                                                                                                                             |                                                                                                                                                                                                                                                                                                                                                                                                                                                                                                                                                                                                                                                                                                                                                                                                                                                            |
|---------------------------------------------------|-------------------------------------------------------------------------------------------------------------------------------------------------------------------------------------------------------------------------------------------------------------------------------------------------------------|------------------------------------------------------------------------------------------------------------------------------------------------------------------------------------------------------------------------------------------------------------------------------------------------------------------------------------------------------------------------------------------------------------------------------------------------------------------------------------------------------------------------------------------------------------------------------------------------------------------------------------------------------------------------------------------------------------------------------------------------------------------------------------------------------------------------------------------------------------|
|                                                   |                                                                                                                                                                                                                                                                                                             | <i>in Indigenous PHC in Australia.[4] However, there is limited evidence as to the effect of government policy on the uptake and impact of CQI over time.”</i>                                                                                                                                                                                                                                                                                                                                                                                                                                                                                                                                                                                                                                                                                             |
| 5. Rationale                                      | Informal or formal frameworks, models, concepts, and/or theories used to explain the problem, any reasons or assumptions that were used to develop the intervention(s), and reasons why the intervention(s) was expected to work.                                                                           | <p>Page 5; Line 3 - <i>“This paper examines the influence of health policy decisions at the Australian state/territory level and how these may have influenced:</i></p> <ul style="list-style-type: none"> <li><i>i) trends in the consistent uptake of evidence-based CQI tools ...</i></li> <li><i>ii) quality of care (as reflected in adherence to best practice guidelines) in Indigenous PHC services.”</i></li> </ul> <p>Page 7; Line 26 - <i>“We use a comparative case study design to relate state/territory level policy support for CQI to trends in its uptake and in quality of care”</i></p>                                                                                                                                                                                                                                                |
| 6. Specific Aims                                  | Purpose of the project and of this report                                                                                                                                                                                                                                                                   | <p>The specific aim is clearly stated in the abstract and in the main body of the paper. Abstract Page 2; Line 3- <i>We examined the impact of state/territory policy support on 1) uptake of evidence-based CQI activities, and 2) quality of care for Indigenous Australians.</i></p> <p>Main body of paper Page 5; Line 3:<br/><i>This paper examines the influence of health policy decisions at the Australian state/territory level and how these may have influenced:</i></p> <ul style="list-style-type: none"> <li><i>i) trends in the consistent uptake of evidence-based CQI tools available through a research-based CQI initiative (the Audit and Best Practice in Chronic Disease (ABCD) Program; and</i></li> <li><i>ii) quality of care (as reflected in adherence to best practice guidelines) in Indigenous PHC services.</i></li> </ul> |
| <b>Methods – what did you do?</b>                 |                                                                                                                                                                                                                                                                                                             |                                                                                                                                                                                                                                                                                                                                                                                                                                                                                                                                                                                                                                                                                                                                                                                                                                                            |
| 7. Context                                        | Contextual elements considered important at the outset of introducing the intervention(s)                                                                                                                                                                                                                   | We have described the context of the study in the introduction - national policy context of CQI in Indigenous primary health care, Indigenous peoples health and access to primary care, ABCD Program of work. Because understanding of the context is relevant to the aim we have included this information in the introduction before the statement of the aim (see Page 4 Line 18 – 55; Page 5 Line 16- 36)                                                                                                                                                                                                                                                                                                                                                                                                                                             |
| 8. Intervention &<br>9. Study of the intervention | <ul style="list-style-type: none"> <li>• Description of the intervention(s) in sufficient detail that others could reproduce it and specifics of the team involved in the work</li> <li>• Approach chosen for assessing the impact of the intervention(s) and approach used to establish whether</li> </ul> | <ul style="list-style-type: none"> <li>• The policy and infrastructure support provided in different jurisdictions is described in depth in the findings section (see Page 9 onwards) and also in supplementary material.</li> <li>• The methods are described in detail (see Page 7 onwards).</li> </ul>                                                                                                                                                                                                                                                                                                                                                                                                                                                                                                                                                  |

1  
2  
3  
4  
5  
6  
7  
8  
9  
10  
11  
12  
13  
14  
15  
16  
17  
18  
19  
20  
21  
22  
23  
24  
25  
26  
27  
28  
29  
30  
31  
32  
33  
34  
35  
36  
37  
38  
39  
40  
41  
42  
43  
44  
45  
46  
47  
48  
49

|                            |                                                                                                                                                                                                                                                                                                                                                                                                                                                                       |                                                                                                                                                                                                                                                                                                                                                                                                                                                                                                                                                                                                                                                                                                                                                                                                                                                                                                                                                                                                                                                                                                                                                                                                                                 |
|----------------------------|-----------------------------------------------------------------------------------------------------------------------------------------------------------------------------------------------------------------------------------------------------------------------------------------------------------------------------------------------------------------------------------------------------------------------------------------------------------------------|---------------------------------------------------------------------------------------------------------------------------------------------------------------------------------------------------------------------------------------------------------------------------------------------------------------------------------------------------------------------------------------------------------------------------------------------------------------------------------------------------------------------------------------------------------------------------------------------------------------------------------------------------------------------------------------------------------------------------------------------------------------------------------------------------------------------------------------------------------------------------------------------------------------------------------------------------------------------------------------------------------------------------------------------------------------------------------------------------------------------------------------------------------------------------------------------------------------------------------|
|                            | the observed outcomes were due to the intervention(s)                                                                                                                                                                                                                                                                                                                                                                                                                 | <ul style="list-style-type: none"> <li>The outcome measures (trends in CQI activity and trends in quality of care) are described in the methods section (Page 7; Line 56 – Page 8 Line 30).</li> <li>Questions of attribution or observed trends to policy and infrastructure are addressed in the discussion (Page 15 onwards)</li> </ul>                                                                                                                                                                                                                                                                                                                                                                                                                                                                                                                                                                                                                                                                                                                                                                                                                                                                                      |
| 10. Measures               | <ul style="list-style-type: none"> <li>Measures chosen for studying processes and outcomes of the intervention(s), including rationale for choosing them, their operational definitions, and their validity and reliability</li> <li>Description of the approach to the ongoing assessment of contextual elements that contributed to the success, failure, efficiency, and cost</li> <li>Methods employed for assessing completeness and accuracy of data</li> </ul> | <p>The case study methods are explained in the first paragraph in the methods section. For example, Page 7; Line 26 - <i>‘We use a comparative case study design to relate state/territory level policy support for CQI to trends in its uptake and in quality of care. The five states/territories provide the ‘cases’ for comparison as they all have some consistent CQI data available through participation by services in the ABCD Program.’</i></p> <p>The case study method captures the contextual elements that may have influenced the intervention and outcomes.</p> <p>Details of the clinical audit methods are detailed in the methods (Page 7; Line 26), table 1 (Page 5; Line 43) and supplementary material (Page 24). For example (Page 7; Line 46), <i>‘Data on CQI activity and on adherence to clinical best practice guidelines were available through ABCD. This paper focuses on four priority aspects of care: preventive, Type 2 diabetes, maternal care and child health. The CQI and clinical record audit processes through which data are collected and reported at health service level are summarized in Table 1 and Additional File 1, and described in more detail elsewhere.[3,12]’</i></p> |
| 11. Analysis               | <ul style="list-style-type: none"> <li>Qualitative and quantitative methods used to draw inferences from the data</li> <li>Methods for understanding variation within the data, including the effects of time as a variable</li> </ul>                                                                                                                                                                                                                                | <p>The methods section (page 7 onwards) of the manuscript contains a full description of the methods utilised. We also provide a supplementary file (see Additional File 1) that contains further details on methods.</p> <p>Variation in the audit data are reflected in the box plots in the Supplementary Material (Page 25 onwards).</p>                                                                                                                                                                                                                                                                                                                                                                                                                                                                                                                                                                                                                                                                                                                                                                                                                                                                                    |
| 12. Ethical considerations | Ethical aspects of implementing and studying the intervention(s) and how they were addressed, including, but not limited to, formal ethics review and potential conflict(s) of interest                                                                                                                                                                                                                                                                               | <p>A statement about formal ethical approval has been made within the manuscript. For example (page 9; Line 7-11), <i>“Ethical approval for the ABCD National Research Partnership was obtained from research ethics committees in each relevant Australian jurisdiction.”</i></p> <p>A more detailed version of ethics statement is made at the end of the paper with other declarations, see Page 20; Line 20.</p>                                                                                                                                                                                                                                                                                                                                                                                                                                                                                                                                                                                                                                                                                                                                                                                                            |

3  
SQUIRE guidelines

|                                        |                                                                                                                                                                                                                                                                                                                                                                                                                                                                                                                                                                                                                                           |                                                                                                                                                                                                                                                                                                                                                                                                                                                                                                                                                                                                                                                                                                                                                                                                                                                                                                                                                                                                                                                                                                                                                                                                                                                                                                                                   |
|----------------------------------------|-------------------------------------------------------------------------------------------------------------------------------------------------------------------------------------------------------------------------------------------------------------------------------------------------------------------------------------------------------------------------------------------------------------------------------------------------------------------------------------------------------------------------------------------------------------------------------------------------------------------------------------------|-----------------------------------------------------------------------------------------------------------------------------------------------------------------------------------------------------------------------------------------------------------------------------------------------------------------------------------------------------------------------------------------------------------------------------------------------------------------------------------------------------------------------------------------------------------------------------------------------------------------------------------------------------------------------------------------------------------------------------------------------------------------------------------------------------------------------------------------------------------------------------------------------------------------------------------------------------------------------------------------------------------------------------------------------------------------------------------------------------------------------------------------------------------------------------------------------------------------------------------------------------------------------------------------------------------------------------------|
|                                        |                                                                                                                                                                                                                                                                                                                                                                                                                                                                                                                                                                                                                                           | We have also provided a statement about any potential conflict of interests and funding sources, see Page 19, Line 37 and Page 20, Line 43 respectively.                                                                                                                                                                                                                                                                                                                                                                                                                                                                                                                                                                                                                                                                                                                                                                                                                                                                                                                                                                                                                                                                                                                                                                          |
| <b>Results – What did you find?</b>    |                                                                                                                                                                                                                                                                                                                                                                                                                                                                                                                                                                                                                                           |                                                                                                                                                                                                                                                                                                                                                                                                                                                                                                                                                                                                                                                                                                                                                                                                                                                                                                                                                                                                                                                                                                                                                                                                                                                                                                                                   |
| 13. Results                            | <ul style="list-style-type: none"> <li>Initial steps of the intervention(s) and their evolution over time (e.g., time-line diagram, flow chart, or table), including modifications made to the intervention during the project</li> <li>Details of the process measures and outcome</li> <li>Contextual elements that interacted with the intervention(s)</li> <li>Observed associations between outcomes, interventions, and relevant contextual elements</li> <li>Unintended consequences such as unexpected benefits, problems, failures, or costs associated with the intervention(s).</li> <li>Details about missing data</li> </ul> | <p>We have presented the findings under two major headings that link directly to the aims of the manuscript.</p> <ul style="list-style-type: none"> <li><i>Policy initiatives that may have influenced uptake of the ABCD Program CQI, by state and territory</i> (see Page 9 ; Line 16)</li> <li><i>Trends in quality of care</i> (see Page 13 ; Line 51)</li> </ul>                                                                                                                                                                                                                                                                                                                                                                                                                                                                                                                                                                                                                                                                                                                                                                                                                                                                                                                                                             |
| <b>Discussion – what does it mean?</b> |                                                                                                                                                                                                                                                                                                                                                                                                                                                                                                                                                                                                                                           |                                                                                                                                                                                                                                                                                                                                                                                                                                                                                                                                                                                                                                                                                                                                                                                                                                                                                                                                                                                                                                                                                                                                                                                                                                                                                                                                   |
| 14. Summary                            | <ul style="list-style-type: none"> <li>Key findings, including relevance to the rationale and specific aims</li> <li>Particular strengths of the project</li> </ul>                                                                                                                                                                                                                                                                                                                                                                                                                                                                       | <p>The first two paragraphs of the discussion are a summary of the key findings in relation to the aims of the paper. For example, (Page 15; Line 17))</p> <p><i>“Progressive and sustained uptake of ABCD tools occurred in the NT in the context of consistent long-term policy and infrastructure support for CQI. This contrasted with a) a rapid rise and subsequent fall in uptake of these tools in Queensland where the initial high-level policy and infrastructure support was not sustained following a change of government in 2012; and b) low levels of uptake in jurisdictions with relatively less policy and infrastructure support (NSW, WA, SA). The consistent long-term policy and infrastructure support for CQI in the NT was also associated with steady improvements or maintenance of high-quality care (as reflected in clinical best practice guidelines) for the four aspects of care that were the major focus of ABCD CQI efforts, and reduction in variation between health services for two of these. This contrasted with the situation in Queensland where there was a relatively limited effect on adherence to best practice guidelines and on variation between health services.”</i></p> <p><i>“While this study does not provide an in-depth examination of the complex processes</i></p> |



1  
2  
3  
4  
5  
6  
7  
8  
9  
10  
11  
12  
13  
14  
15  
16  
17  
18  
19  
20  
21  
22  
23  
24  
25  
26  
27  
28  
29  
30  
31  
32  
33  
34  
35  
36  
37  
38  
39  
40  
41  
42  
43  
44  
45  
46  
47  
48  
49

|                    |                                                                                                                                                                                                                                                                                                                                                                                                                                                      |                                                                                                                                                                                                                                                                                                                                                                                                                                                                                                                                                                                                                                                                                                                                                                                                                                                                                                                                                                                                                                                                                                                                                                                                                                                                                                                                                                                                                  |
|--------------------|------------------------------------------------------------------------------------------------------------------------------------------------------------------------------------------------------------------------------------------------------------------------------------------------------------------------------------------------------------------------------------------------------------------------------------------------------|------------------------------------------------------------------------------------------------------------------------------------------------------------------------------------------------------------------------------------------------------------------------------------------------------------------------------------------------------------------------------------------------------------------------------------------------------------------------------------------------------------------------------------------------------------------------------------------------------------------------------------------------------------------------------------------------------------------------------------------------------------------------------------------------------------------------------------------------------------------------------------------------------------------------------------------------------------------------------------------------------------------------------------------------------------------------------------------------------------------------------------------------------------------------------------------------------------------------------------------------------------------------------------------------------------------------------------------------------------------------------------------------------------------|
|                    |                                                                                                                                                                                                                                                                                                                                                                                                                                                      | <p><i>that might explain different trends in the uptake of tools, or how CQI processes have impacted on quality of care in different jurisdictions, some insight has been provided by previous studies of the ABCD CQI program and the evaluation of the NT CQI Strategy. Gardner highlighted the complexity of the process of uptake of CQI, and the critical role of alignment of policies and incentives; a systems approach; organization-wide commitment; leadership at all levels; and resources to support implementation.[14] Our findings of relatively low uptake of CQI in jurisdictions with limited policy and infrastructure support, and the rapid drop in use of CQI tools when policy, infrastructure and funding support was withdrawn in Queensland, highlights the critical role these play in supporting its uptake. In other states, the lack of clear and consistent policy direction, resourcing and sustained high-level leadership and management support for CQI, and relative lack of engagement in wide-scale CQI research has led to a diversity of locally driven initiatives with an associated lack of systematic analysis and reporting of data for CQI purposes. This appears to have been a barrier to demonstrably effective uptake of CQI in many Indigenous PHC services between 2005 and 2014.”</i></p>                                                                  |
| 15. Interpretation | <ul style="list-style-type: none"> <li>• Nature of the association between the intervention(s) and the outcomes</li> <li>• Comparison of results with findings from other publications</li> <li>• Impact of the project on people and systems</li> <li>• Reasons for any differences between observed and anticipated outcomes, including the influence of context</li> <li>• Costs and strategic trade-offs, including opportunity costs</li> </ul> | <p>We have included a section in the discussion on interpretation and comparison to relevant literature:</p> <p>For example (page 16; Line 11) , <i>“The limited availability of data for systematic analysis and reporting of relevant data, other than in Queensland and NT, has precluded meaningful analysis of adherence to best practice guidelines for most states/territories. The first report on national Key Performance Indicators (nKPIs) from Indigenous PHC organizations showed that in 2012-13 those in Queensland and the NT performed better against almost all process-of-care indicators,[20] attributing this to the relatively well-established CQI programs in these jurisdictions. The third and most recent nKPI report, which includes data up to December 2014,[21] shows improvements for 17 of the 19 process-of-care measures for all jurisdictions combined, with continued relatively high performance in the NT and Queensland and most marked recent improvement in WA. The analysis presented in this paper points to the importance of high-level policy support and resourcing for implementation of systematic CQI processes to enhance quality of care. The relatively high performance, and the greater ability to report nKPI data, in the NT and Queensland demonstrate the benefits of systematic CQI processes for reporting of data on KPIs as well as for</i></p> |

|                        |                                                                                                                                                                                                                                                                                                                       |                                                                                                                                                                                                                                                                                                                                                                                                                                                                                                                                                                                                                                                                                                                                                                                                                                                                                                                                                                                                                                                                                                                                                                                                                                                                                                                                                                                                                                                                                                                                                                                                                                                                                                                                                                                                                                                                                                                                                                                                                                                                                                                                                               |
|------------------------|-----------------------------------------------------------------------------------------------------------------------------------------------------------------------------------------------------------------------------------------------------------------------------------------------------------------------|---------------------------------------------------------------------------------------------------------------------------------------------------------------------------------------------------------------------------------------------------------------------------------------------------------------------------------------------------------------------------------------------------------------------------------------------------------------------------------------------------------------------------------------------------------------------------------------------------------------------------------------------------------------------------------------------------------------------------------------------------------------------------------------------------------------------------------------------------------------------------------------------------------------------------------------------------------------------------------------------------------------------------------------------------------------------------------------------------------------------------------------------------------------------------------------------------------------------------------------------------------------------------------------------------------------------------------------------------------------------------------------------------------------------------------------------------------------------------------------------------------------------------------------------------------------------------------------------------------------------------------------------------------------------------------------------------------------------------------------------------------------------------------------------------------------------------------------------------------------------------------------------------------------------------------------------------------------------------------------------------------------------------------------------------------------------------------------------------------------------------------------------------------------|
| <p>16. Limitations</p> | <ul style="list-style-type: none"> <li>• Limits to the generalizability of the work</li> <li>• Factors that might have limited internal validity such as confounding, bias, or imprecision in the design, methods, measurement, or analysis</li> <li>• Efforts made to minimize and adjust for limitations</li> </ul> | <p><i>enhancing quality of care.</i></p> <p>In our discussion we have a number of paragraphs that outline the limitations of the work, efforts made to minimize limitations and generalizability. For example (page 17: Line 10 – Line 52),</p> <p><i>“An important limitation of our study is that it is not possible to determine clearly the extent to which trends in data on quality of care have been influenced by policy support for the ABCD CQI program or to other initiatives (e.g. funding, workforce or infrastructure developments). The difficulty of demonstrating causality is common to much policy research,[22] however we argue here for contribution rather than attribution ....”</i></p> <p><i>“The ABCD data are not representative of all Indigenous PHC services. There was variable participation in different jurisdictions and by government-operated and community-controlled health services. ...The ABCD data need to be interpreted in relation to a range of other CQI activities in Indigenous PHC services over the period for which data has been reported[9,11]. While there were some substantial initiatives, particularly in the NT and Queensland, most CQI initiatives were small scale, narrow in scope and without the capability to analyze and report consistent data to the extent possible through ABCD. Nor has it been possible to assess systematically these CQI activities or their impact on quality of care. In addition, there were a range of non-CQI initiatives at the national [e.g. Indigenous Chronic Disease Package [23] and local levels, which may have impacted on quality of care over the period for which we have reported data.”</i></p> <p><i>The authors of this paper have all had longstanding involvement with the ABCD Program as researchers, service providers, managers or policy makers/advisors. While our interest in ABCD may have influenced our interpretation of the data, the diversity of roles, insights and perspectives that we bring allows for critical reflection in the interpretation of the data, and brings rigor to this type of research.[22]</i></p> |
| <p>17. Conclusions</p> | <ul style="list-style-type: none"> <li>• Usefulness of the work</li> <li>• Sustainability</li> <li>• Potential for spread to other contexts</li> <li>• Implications for practice and for further study in the field</li> </ul>                                                                                        | <p>Within the discussion we address implications for policy, practice and further research. For example (page 17; Line 55),</p> <p><i>“The ABCD experience, as reflected in this paper, has important implications for practice, policy and further research, including the implementation of the National</i></p>                                                                                                                                                                                                                                                                                                                                                                                                                                                                                                                                                                                                                                                                                                                                                                                                                                                                                                                                                                                                                                                                                                                                                                                                                                                                                                                                                                                                                                                                                                                                                                                                                                                                                                                                                                                                                                            |

1  
2  
3  
4  
5  
6  
7  
8  
9  
10  
11  
12  
13  
14  
15  
16  
17  
18  
19  
20  
21  
22  
23  
24  
25  
26  
27  
28  
29  
30  
31  
32  
33  
34  
35  
36  
37  
38  
39  
40  
41  
42  
43  
44  
45  
46  
47  
48  
49

|                          |                                                                                                                                                     |                                                                                                                                                                                                                                                                                                                                                                                                                                                                                                                                                                                                                                                                                                                                                                                                                                                                                                                                                                                                                                                                                                                                                                                                                                                                                                                                                                                                                                                                                                                                                                                                                                                                                                                                                                                                                                                                                                                                                                                                                                                                                                                                                          |
|--------------------------|-----------------------------------------------------------------------------------------------------------------------------------------------------|----------------------------------------------------------------------------------------------------------------------------------------------------------------------------------------------------------------------------------------------------------------------------------------------------------------------------------------------------------------------------------------------------------------------------------------------------------------------------------------------------------------------------------------------------------------------------------------------------------------------------------------------------------------------------------------------------------------------------------------------------------------------------------------------------------------------------------------------------------------------------------------------------------------------------------------------------------------------------------------------------------------------------------------------------------------------------------------------------------------------------------------------------------------------------------------------------------------------------------------------------------------------------------------------------------------------------------------------------------------------------------------------------------------------------------------------------------------------------------------------------------------------------------------------------------------------------------------------------------------------------------------------------------------------------------------------------------------------------------------------------------------------------------------------------------------------------------------------------------------------------------------------------------------------------------------------------------------------------------------------------------------------------------------------------------------------------------------------------------------------------------------------------------|
|                          | <ul style="list-style-type: none"> <li>Suggested next steps</li> </ul>                                                                              | <p><i>CQI Framework for Aboriginal and Torres Strait Islander PHC [9]. For clinical staff and management of health services, the benefits of participating in this type of collaborative program include access to a CQI system that provides data on recent performance and trend data across the broad scope of primary care, and the ability to benchmark against other services at the regional, state/territory and national level. For policy professionals, benefits include the ability to monitor adherence to best practice guidelines at all levels, and to target improvements to specific aspects or modes of care, [19] population groups (e.g. children or the elderly) or geographic locations. An important challenge for ongoing and new CQI initiatives is to enhance local ownership and engagement, while ensuring the use of standard tools and supporting the analytical capability that enables the use of consistent good quality data for CQI purposes at multiple levels of the system. Sustaining efforts to deliver the best care according to changing evidence over time remains important and warrants further attention.”</i></p> <p>Our concluding statement also contains information about next steps and potential spread. For example (Page 18; Line 23),</p> <p><i>“Our study adds to the accumulating evidence on the conditions that enable CQI efforts to be most effective. The findings show the potential contribution that systematic and sustained policy and infrastructure support can make to wide-scale uptake and to the effectiveness of CQI methods in improving the quality of care. It is now about 10 years since our first published paper on the potential for CQI to enhance the quality of health care for Indigenous Australians. With the development of a National CQI Framework in 2015 [9] it appears we may be at the dawn of a new era of wide-scale and systematic use of CQI methods. While local efforts are vital to the effective use of CQI methods, state/territory-level policy and resources will be critical to building capability and a supportive environment.”</i></p> |
| <b>Other information</b> |                                                                                                                                                     |                                                                                                                                                                                                                                                                                                                                                                                                                                                                                                                                                                                                                                                                                                                                                                                                                                                                                                                                                                                                                                                                                                                                                                                                                                                                                                                                                                                                                                                                                                                                                                                                                                                                                                                                                                                                                                                                                                                                                                                                                                                                                                                                                          |
| 18. Funding              | Sources of funding that supported this work. Role, if any, of the funding organization in the design, implementation, interpretation, and reporting | We have made full disclosure of funding (see Page 20 ; Line 10) and any conflicts of interest (page 19; Line 37) within the manuscript.                                                                                                                                                                                                                                                                                                                                                                                                                                                                                                                                                                                                                                                                                                                                                                                                                                                                                                                                                                                                                                                                                                                                                                                                                                                                                                                                                                                                                                                                                                                                                                                                                                                                                                                                                                                                                                                                                                                                                                                                                  |

7  
SQUIRE guidelines

# BMJ Open

## Impact of policy support on uptake of evidence-based continuous quality improvement activities and the quality of care for Indigenous Australians: a comparative case study

|                                 |                                                                                                                                                                                                                                                                                                                                                                                                                                                                                                                                                                                                                                                                                                                                                                                                         |
|---------------------------------|---------------------------------------------------------------------------------------------------------------------------------------------------------------------------------------------------------------------------------------------------------------------------------------------------------------------------------------------------------------------------------------------------------------------------------------------------------------------------------------------------------------------------------------------------------------------------------------------------------------------------------------------------------------------------------------------------------------------------------------------------------------------------------------------------------|
| Journal:                        | <i>BMJ Open</i>                                                                                                                                                                                                                                                                                                                                                                                                                                                                                                                                                                                                                                                                                                                                                                                         |
| Manuscript ID                   | bmjopen-2017-016626.R1                                                                                                                                                                                                                                                                                                                                                                                                                                                                                                                                                                                                                                                                                                                                                                                  |
| Article Type:                   | Research                                                                                                                                                                                                                                                                                                                                                                                                                                                                                                                                                                                                                                                                                                                                                                                                |
| Date Submitted by the Author:   | 21-Jun-2017                                                                                                                                                                                                                                                                                                                                                                                                                                                                                                                                                                                                                                                                                                                                                                                             |
| Complete List of Authors:       | Bailie, Ross; University of Sydney, University Centre for Rural Health - North Coast<br>Matthews, Veronica; University of Sydney, University Centre for Rural Health - North Coast<br>Larkins, Sarah; James Cook University, College of Medicine and Dentistry<br>Thompson, Sandra; University of Western Australia, Western Australian Centre for Rural Health<br>Burgess, Paul; Northern Territory Department of Health and Families<br>Weeramanthri, Tarun; Western Australia Department of Health<br>Bailie, Jodie; University of Sydney, University Centre for Rural Health - North Coast<br>Cunningham, Frances; Menzies School of Health Research, Kwedza, Ru; University of New South Wales, School of Public Health and Community Medicine<br>Clark, Louise; Menzies School of Health Research |
| <b>Primary Subject Heading</b>: | Health services research                                                                                                                                                                                                                                                                                                                                                                                                                                                                                                                                                                                                                                                                                                                                                                                |
| Secondary Subject Heading:      | Health services research                                                                                                                                                                                                                                                                                                                                                                                                                                                                                                                                                                                                                                                                                                                                                                                |
| Keywords:                       | PRIMARY CARE, AUDIT, Clinical audit < HEALTH SERVICES ADMINISTRATION & MANAGEMENT, Health policy < HEALTH SERVICES ADMINISTRATION & MANAGEMENT, Quality in health care < HEALTH SERVICES ADMINISTRATION & MANAGEMENT                                                                                                                                                                                                                                                                                                                                                                                                                                                                                                                                                                                    |
|                                 |                                                                                                                                                                                                                                                                                                                                                                                                                                                                                                                                                                                                                                                                                                                                                                                                         |

SCHOLARONE™  
Manuscripts

1  
2  
3  
4 **1 Impact of policy support on uptake of evidence-based continuous quality**  
5  
6 **2 improvement activities and the quality of care for Indigenous Australians:**  
7  
8 **3 a comparative case study**

9  
10 4 Ross Bailie<sup>1</sup>, Veronica Matthews<sup>1</sup>, Sarah Larkins<sup>2</sup>, Sandra C Thompson<sup>3</sup>, Paul Burgess<sup>4</sup>,  
11 5 Tarun Weeramanthri<sup>5</sup>, Jodie Bailie<sup>1</sup>, Frances Cunningham<sup>6</sup>, Ru Kwedza<sup>7</sup>, Louise Clark<sup>6</sup>  
12 6

13  
14  
15 7 <sup>1</sup>University of Sydney, University Centre for Rural Health – North Coast, School of Rural  
16 8 Health, Lismore, Australia

17  
18 9 <sup>2</sup>James Cook University, College of Medicine and Dentistry, Townsville, Australia

19  
20 10 <sup>3</sup>University of Western Australia, Western Australian Centre for Rural Health, Geraldton,  
21 11 Australia

22  
23 12 <sup>4</sup>Northern Territory Department of Health, Darwin, Australia

24  
25 13 <sup>5</sup>Department of Health, Government of Western Australia, Perth, Australia

26  
27 14 <sup>6</sup>Charles Darwin University, Menzies School of Health Research, Brisbane, Australia

28  
29 15 <sup>7</sup>University of New South Wales, School of Public Health and Community Medicine, Sydney,  
30 16 Australia  
31 17

32  
33 18 **Corresponding author:**

34  
35 19 Ross Bailie

36  
37 20 University of Sydney, University Centre for Rural Health – North Coast, School of Rural  
38 21 Health

39  
40 22 61 Uralba Street

41  
42 23 Lismore NSW 2480

43  
44 24 Australia

45 25 Email: [ross.bailie@sydney.edu.au](mailto:ross.bailie@sydney.edu.au)

46  
47 26 Phone: +61 417 818 309  
48 27

49  
50 28 **Key Words:** Continuous Quality Improvement; primary health care; health policy;  
51 29 Aboriginal and Torres Strait Islander health  
52 30

53  
54  
55 31 **Word count: 3739**  
56  
57 32  
58  
59  
60

1  
2  
3 1 **ABSTRACT**  
4  
5 2

6 3 **Objectives:** To examine the impact of state/territory policy support on 1) uptake of evidence-  
7 4 based continuous quality improvement (CQI) activities, and 2) quality of care for Indigenous  
8 5 Australians.  
9 6

10 7 **Design:** Mixed-method comparative case study methodology, drawing on quality of care  
11 8 audit data, documentary evidence of policies and strategies, and the experience and insights  
12 9 of stakeholders involved in relevant CQI programs. We use multilevel linear regression to  
13 10 analyse jurisdictional differences in quality of care.  
14 11

15 12 **Setting:** Indigenous primary health care services across five states/territories of Australia.  
16 13

17 14 **Participants:** 175 Indigenous primary health care services.  
18 15

19 16 **Interventions:** A range of national and state/territory policy and infrastructure initiatives to  
20 17 support CQI, including support for applied research.  
21 18

22 19 **Primary and secondary outcome measures:**

- 23 20 i) trends in the consistent uptake of evidence-based CQI tools available through a  
24 21 research-based CQI initiative (the Audit and Best Practice in Chronic Disease  
25 22 (ABCD) Program; and  
26 23 ii) quality of care (as reflected in adherence to best practice guidelines)  
27 24

28 25 **Results:** Progressive uptake of evidence-based CQI activities and steady improvements or  
29 26 maintenance of high-quality care occurred where there was long-term policy and  
30 27 infrastructure support for CQI. Where support was provided but not sustained there was a  
31 28 rapid rise and subsequent fall in relevant CQI activities.  
32 29

33 30 **Conclusions:** Health authorities should ensure consistent and sustained policy and  
34 31 infrastructure support for CQI to enable wide-scale and ongoing improvement in quality of  
35 32 care and, subsequently, health outcomes. It is not sufficient for improvement initiatives to  
36 33 rely on local service managers and clinicians, as their efforts are strongly mediated by higher  
37 34 system level influences.  
38 35  
39 36  
40  
41  
42  
43  
44  
45  
46  
47  
48  
49  
50  
51  
52  
53  
54  
55  
56  
57  
58  
59  
60

## STRENGTHS AND LIMITATIONS OF THIS STUDY

- Using a mixed-method comparative case study methodology and drawing on data from 175 Indigenous primary health care services across Australia, we examine the impact of state/territory policy support and strategies on 1) uptake of CQI activities, and 2) quality of care for Indigenous Australians.
- Our analysis of several years of data from the largest and most comprehensive CQI program in Australia shows that consistent and sustained policy and infrastructure support for CQI enables wide-scale and ongoing improvement in quality of care and, subsequently, health outcomes.
- Our study adds to the accumulating evidence on the conditions that enable CQI efforts to be most effective.
- The authors of this paper have all had longstanding involvement with a national CQI program as researchers, service providers, managers or policy makers/advisors.
- A limitation of our study is that it is not possible to clearly attribute the extent to which trends in data on quality of care have been influenced by various concurrent policy and other initiatives.

## 1 INTRODUCTION

2 Internationally there is wide variation in adherence to best practice clinical guidelines  
3 between health services and between health professionals.[1] There is a growing body of  
4 evidence about the effectiveness of continuous quality improvement (CQI) in increasing  
5 adherence to guidelines and on the factors that contribute to this.[2] Variation in quality of  
6 care between health services has been demonstrated, including in populations with poorer  
7 health status, such as Aboriginal and Torres Strait Islander (hereafter respectfully referred to  
8 as Indigenous) peoples in Australia.[3,4]

### 10 *Indigenous people's health, and access to primary health care*

11 Australia is a high-income country with gross disparities in health outcomes between  
12 Indigenous and non-Indigenous people. This inequity has complex causes, including  
13 historical trauma and dispossession as a result of colonisation, social and economic  
14 conditions, and persistent racism. While the Indigenous population is about 730,000 (3% of  
15 the Australian total), the numbers and proportion of the population varies widely between  
16 jurisdictions.[5]

18 Indigenous people access primary health care (PHC) through services specifically established  
19 to meet their needs - both community-controlled and government-managed – and private  
20 general practice.[6]

### 22 *Positive policy environment*

23 A recently proposed four-level framework to describe the causes of the 'evidence–practice  
24 gap'[7] backs up previous work that has called for change at multiple levels of the health  
25 system to support wide-scale improvement in the quality of care.[8] While system-wide  
26 approaches to CQI have been associated with achieving large-scale improvements in health  
27 outcomes, there is limited evidence of the effectiveness of CQI over an extended period.[2] A  
28 positive policy environment is widely recognised as vital for effective development and  
29 implementation of programs to prevent and manage chronic disease,[9] with previous cross-  
30 regional analyses identifying the importance of regional level policies in enhancing clinical  
31 performance in Indigenous PHC in Australia.[4] However, there is limited evidence as to the  
32 effect of government policy on the uptake and impact of CQI over time.



1 This paper examines the influence of health policy decisions at the Australian state/territory  
2 level and how these may have influenced:

- 3 i) trends in the consistent uptake of evidence-based CQI tools available through a  
4 research-based CQI initiative (the Audit and Best Practice in Chronic Disease  
5 (ABCD) Program; and
- 6 ii) quality of care (as reflected in adherence to best practice guidelines) in Indigenous  
7 PHC services.

### 9 *National policy context - CQI in Indigenous PHC*

10 The rapid growth since 2002 in CQI initiatives in Indigenous PHC has been supported to  
11 varying extents by several large-scale CQI programs operating across a number of Australian  
12 states/territories, for example, the Australian Primary Care Collaborative (APCC), Healthy  
13 for Life, and the ABCD Program.[10-12] As a program of applied research, ABCD is the  
14 longest running and most extensively documented of these initiatives (Table 1). To some  
15 extent, the Healthy for Life program encouraged use of ABCD tools and processes by  
16 commissioning and promoting some of the audit tools in the program. Similarly, engagement  
17 with the APCC may have been a stimulus for services to explore the use of ABCD tools and  
18 processes, and vice versa. In 2015, the Australian Government Department of Health  
19 provided funding for the development and implementation of a National CQI Framework for  
20 Aboriginal and Torres Strait Islander PHC,[10] which outlines roles and responsibilities for  
21 CQI at various levels of the system.

22  
23 [INSERT Table 1]  
24

#### 25 **Table 1: The ABCD Program and continuous quality improvement tools**

|                                                                                                                                                                                                                                                                                                                                                                                                                                                                                                                                                                                                                                                                                                                                                                                          |
|------------------------------------------------------------------------------------------------------------------------------------------------------------------------------------------------------------------------------------------------------------------------------------------------------------------------------------------------------------------------------------------------------------------------------------------------------------------------------------------------------------------------------------------------------------------------------------------------------------------------------------------------------------------------------------------------------------------------------------------------------------------------------------------|
| <p>26 The Audit and Best Practice in Chronic Disease (ABCD) Program is a continuous quality<br/>27 improvement (CQI) action research project that employed a systems approach to enhancing<br/>28 care delivered through Indigenous primary health care (PHC) services across Australia.[3]<br/>29 Commencing in 2002, ABCD brought together service providers, policy makers and<br/>30 researchers in a collaborative program of applied research, with the aims of developing and<br/>31 enhancing the feasibility of CQI tools and processes on a wide scale, examining factors<br/>32 associated with variation in quality of care and strategies that have been effective in<br/>33 improving quality of care, and to work together to enhance the implementation of effective</p> |
|------------------------------------------------------------------------------------------------------------------------------------------------------------------------------------------------------------------------------------------------------------------------------------------------------------------------------------------------------------------------------------------------------------------------------------------------------------------------------------------------------------------------------------------------------------------------------------------------------------------------------------------------------------------------------------------------------------------------------------------------------------------------------------------|

1 strategies. We have previously reported on factors that influence variation in quality of care  
2 between health services [11] and are engaged in an ongoing program of research on priorities  
3 and strategies for improvement.[13] Supported by a national CQI support entity  
4 (One21seventy), since 2010, more than 270 Indigenous PHC services have used standardized  
5 evidence-based best-practice clinical audit and system assessment tools to assess and reflect  
6 on health service system performance, typically on an annual basis. The tools have been used  
7 to varying extent in all Australian states/territories.

8  
9 [INSERT FIGURE 1]

10  
11 CQI tools developed through the ABCD Program cover priority aspects of PHC (including  
12 preventive care, diabetes, child health, and maternal health). The clinical audit tools were  
13 developed by expert working groups, with participation of specialists in relevant aspects of  
14 care and health service staff.[3] The tools were designed to enable services to assess their  
15 work against best practice standards as reflected in widely accepted evidence-based  
16 guidelines; each tool is accompanied by an audit protocol. The ABCD audit tools are ideally  
17 used in a system-oriented collaborative and supportive CQI approach, together with an  
18 assessment of health service system performance conducted by health service staff in a  
19 facilitated group discussion using a standardized systems assessment tool.[14] The evidence  
20 of effectiveness of the ABCD CQI process [11,15] is consistent with international evidence  
21 of effectiveness of quality improvement strategies. [2]

### 1 *The ABCD Program*

2 For the duration of its operation the ABCD program has had a strong focus on both  
3 developing the evidence base for CQI in Indigenous PHC as well as supporting  
4 implementation of evidence based CQI practices.[3,16,17] The ABCD program, and its  
5 associated service support arm One21seventy, has been used most extensively in the  
6 Northern Territory (NT) and Queensland (QLD) by both government and community-  
7 controlled Indigenous PHC services, and to a lesser extent in New South Wales (NSW),  
8 South Australia (SA) and Western Australia (WA). The timing and nature of policy and  
9 funding support for ABCD and other CQI programs has varied between jurisdictions. The  
10 most substantial support was available in the NT and QLD, and was generally of smaller  
11 scale and more fragmented in NSW, SA and WA.[10,17](Table 1).

### 12 **METHODS**

13 We use a comparative case study design to relate state/territory level policy support for CQI  
14 to trends in its uptake and in quality of care. The five states/territories provide the ‘cases’ for  
15 comparison as they all have some consistent CQI data available through participation by  
16 services in the ABCD Program.

17  
18  
19 Information on the use of CQI processes and tools, and on policy and infrastructure support  
20 for CQI initiatives is drawn from publicly available sources. Information from these  
21 documentary sources is supplemented by the experience and insights of the authors, all of  
22 whom have been closely involved (including as service providers, managers, policy makers  
23 and advisors, CQI coordinators, and researchers) over an extended period in relevant CQI  
24 programs.

25  
26 Data on CQI activity and on adherence to clinical best practice guidelines were available  
27 through ABCD. This paper focuses on four priority aspects of care: preventive, Type 2  
28 diabetes, maternal care and child health. The CQI and clinical record audit processes through  
29 which data are collected and reported at health service level are summarized in Table 1 and  
30 Additional file 1, and described in more detail elsewhere.[3,15]

### 31 *Outcome measures*

32 For the purpose of assessing extent of CQI activity using ABCD standard tools we sum the  
33 number of different audit tools used in each health service in each year for each jurisdiction.  
34

1  
2  
3 1  
4 2 We use a composite Quality of Care Index (QCI) to measure overall adherence to evidence  
5 3 based clinical best practice guidelines in the delivery of care for each audit tool over  
6 4 successive years. The QCIs provide a measure of adherence to a package of evidence based  
7 5 practices within each area of care. They therefore provide a more holistic measure of quality  
8 6 of clinical care (for example overall delivery of type 2 diabetes care) than specific items of  
9 7 care (for example monitoring or control of HbA1c). We report on these QCIs for only the NT  
10 8 and QLD, as these jurisdictions had data available from a large number of health services.  
11 9 QCIs were calculated by dividing the total number of client services for each client by the  
12 10 total number of possible services in the QCI.[15] We use box plots to report QCIs for  
13 11 participating health services by jurisdiction for consecutive years, and for consecutive audit  
14 12 cycles for health services that completed audits for at least three cycles (Additional file 2).  
15 13 Data on additional cycles are reported where there were data from at least half of the health  
16 14 services that completed audits in at least three cycles.

### 15 *Statistical analysis*

16 16 As the data have a hierarchical structure (patients within health services), mixed multi-level  
17 17 linear regressions were run to test the effect of jurisdictional location (NT and Queensland)  
18 18 on service delivery (as measured by the QCI). Up to four audit cycles were included in the  
19 19 analysis where there were sufficient numbers of health services to enable cross-jurisdictional  
20 20 comparison. To minimize confounding, we confined analysis to health centers that completed  
21 21 the same number of audit cycles within each jurisdiction. The level of service delivery to  
22 22 individual clients (continuous variable: percentage of QCI delivered) was modelled with  
23 23 health service as an additional level random effect. Each model included adjustments for year  
24 24 of audit and audit cycle completed. Jurisdictional location (categorical) was included as a  
25 25 fixed effect. Variance Partition Coefficients were calculated to measure how much variability  
26 26 in adherence to best practice guidelines between health services was attributable to  
27 27 jurisdictional location. Inspection of residual plots showed no obvious deviations from  
28 28 normality or homoscedasticity. P-values were obtained by likelihood ratio tests of the model  
29 29 with jurisdictional location against the empty model without this effect. A p-value  $\geq 0.05$  was  
30 30 considered statistically non-significant. Statistical analyses were conducted with STATA  
31 31 software, V.14.

### 32 *Ethics approval*

1 Ethical approval for the ABCD National Research Partnership was obtained from research  
2 ethics committees in each relevant Australian jurisdiction.[3]

### 3 FINDINGS

#### 4 *Policy initiatives that may have influenced uptake of the ABCD Program CQI, by state and* 5 *territory*

6 A number of national CQI initiatives may have influenced uptake of ABCD along with those  
7 being implemented simultaneously by the states/territories.[10,12] An overview of CQI  
8 policy initiatives, by jurisdiction, showing the greatest uptake of the ABCD CQI tools is  
9 presented in summary form in Table 2 and in more detail in Additional file 3.

10  
11 [INSERT Table 2]

12  
13 **Table 2: Key policy and resourcing developments for CQI initiatives including ABCD**  
14 **2005-2015**

| <b><i>National initiatives that supported CQI across multiple jurisdictions</i></b> |                                                                                                                                                            |
|-------------------------------------------------------------------------------------|------------------------------------------------------------------------------------------------------------------------------------------------------------|
| 2002 – 2006                                                                         | • Continuous Improvement Projects                                                                                                                          |
| 2005 – ongoing                                                                      | • Australian Primary Care Collaborative                                                                                                                    |
| 2005 – ongoing                                                                      | • Healthy for Life Program – while not specifically a CQI program, it did have a CQI component                                                             |
| 2010 – 2016                                                                         | • One21seventy – National Centre for Quality Improvement in Indigenous Primary Health Care                                                                 |
| <b><i>State and Territory programs</i></b>                                          |                                                                                                                                                            |
| <b>Northern Territory</b>                                                           |                                                                                                                                                            |
| 2002 – 2005                                                                         | • Government and ACCHO sectors supported CQI research through the original ABCD Project                                                                    |
| 2005 – 2009                                                                         | • ... and the ABCD Extension Project                                                                                                                       |
| 2009                                                                                | • NT CQI Strategy endorsed by the Aboriginal Health Forum                                                                                                  |
| 2012                                                                                | • Wide-scale employment of CQI Coordinators and Facilitators to support PHC services across the NT                                                         |
| 2013                                                                                | • External evaluation of the NT CQI investment                                                                                                             |
| <b>Queensland</b>                                                                   |                                                                                                                                                            |
| 2005 – 2006                                                                         | • Review commissioned to identify best options for improving Indigenous health identifies CQI as a priority                                                |
| 2007                                                                                | • Development and implementation of CQI Program endorsed at senior government level                                                                        |
| 2008                                                                                | • Employment of CQI Coordinators and Facilitators to support PHC services across QLD                                                                       |
| 2008                                                                                | • North QLD Steering Committee established with key stakeholders, including Royal Flying Doctor Service, Apunipima Cape York Health Council and QLD Health |
| 2010                                                                                | • ... further major investment in CQI support – including contract                                                                                         |

|                                                                  |                                                                                                                                                                                                                                                                                                                      |
|------------------------------------------------------------------|----------------------------------------------------------------------------------------------------------------------------------------------------------------------------------------------------------------------------------------------------------------------------------------------------------------------|
| 2010                                                             | <ul style="list-style-type: none"> <li>with One21seventy to provide CQI support to services</li> <li>Peak community-controlled organisation implemented ‘collaborative style’ CQI processes using electronic data extraction</li> </ul>                                                                              |
| 2011                                                             | <ul style="list-style-type: none"> <li>State-wide CQI Steering Committee established</li> </ul>                                                                                                                                                                                                                      |
| <b>New South Wales</b>                                           |                                                                                                                                                                                                                                                                                                                      |
| 2006                                                             | <ul style="list-style-type: none"> <li>NSW Health provided funding to the peak community-controlled organisation AH&amp;MRC to support CQI among NSW ACHHS through building infrastructure, skills and data collection systems, and to share models of good practice</li> </ul>                                      |
| 2010                                                             | <ul style="list-style-type: none"> <li>Several NSW Indigenous PHCs commenced use of ABCD CQI tools through contracts with One21seventy on their own initiative</li> </ul>                                                                                                                                            |
| 2015                                                             | <ul style="list-style-type: none"> <li>AH&amp;MRC published CQI Success Stories from ten ACCHSs</li> </ul>                                                                                                                                                                                                           |
| <b>Western Australia</b>                                         |                                                                                                                                                                                                                                                                                                                      |
| 2005 – 2009                                                      | <ul style="list-style-type: none"> <li>WA Health provided funds for a CQI Project Officer to support ABCD Program in WA</li> </ul>                                                                                                                                                                                   |
| 2006 – 2007                                                      | <ul style="list-style-type: none"> <li>Peak community-controlled organisation, AHCWA, conducted a pilot of the Australian Primary Care Collaborative in several ACCHSs</li> </ul>                                                                                                                                    |
| 2012 – 2015                                                      | <ul style="list-style-type: none"> <li>AHCWA Research Partnership on CQI</li> </ul>                                                                                                                                                                                                                                  |
| 2014                                                             | <ul style="list-style-type: none"> <li>Holman review recommended implementation of a state-wide CQI program, with reference to One21seventy</li> </ul>                                                                                                                                                               |
| 2014 – 2015                                                      | <ul style="list-style-type: none"> <li>AHCWA reported actively promoting CQI to all member services</li> </ul>                                                                                                                                                                                                       |
| <b>South Australia</b>                                           |                                                                                                                                                                                                                                                                                                                      |
| 2008 – 2009                                                      | <ul style="list-style-type: none"> <li>Review of the evidence conducted</li> </ul>                                                                                                                                                                                                                                   |
| 2010 – 2014                                                      | <ul style="list-style-type: none"> <li>SA Health and Lowitja Institute provided funds for a CQI Project Officer to support ABCD Program in SA. Quality Improvement Officer based at peak community-controlled organisation supporting analysis and feedback to community-controlled health services in SA</li> </ul> |
| <b>Engagement with ABCD Research in each State and Territory</b> |                                                                                                                                                                                                                                                                                                                      |
| <b>Northern Territory</b>                                        |                                                                                                                                                                                                                                                                                                                      |
| 2002                                                             | <ul style="list-style-type: none"> <li>ABCD Program originated in 12 health services in the NT, building on prior work on chronic disease, best-practice guidelines, clinical information systems in Indigenous PHC</li> </ul>                                                                                       |
| 2005                                                             | <ul style="list-style-type: none"> <li>ABCD Extension phase supported development of a CQI hub in Central Australia and Top End</li> </ul>                                                                                                                                                                           |
| 2011 – 2014                                                      | <ul style="list-style-type: none"> <li>All NT Government health services and many ACCHS participated in the ABCD National Research Partnership, with NT ABCD Project Officer supported by funding from NT Health</li> </ul>                                                                                          |
| <b>Queensland</b>                                                |                                                                                                                                                                                                                                                                                                                      |
| 2007 – 2008                                                      | <ul style="list-style-type: none"> <li>ABCD Extension phase supported development of a CQI hub in QLD</li> </ul>                                                                                                                                                                                                     |
| 2011 – 2014                                                      | <ul style="list-style-type: none"> <li>All QLD Health services and several ACCHS participated in the ABCD National Research Partnership, with QLD ABCD Project Officer supported by funding from the Lowitja Institute</li> </ul>                                                                                    |
| <b>New South Wales</b>                                           |                                                                                                                                                                                                                                                                                                                      |
| 2005                                                             | <ul style="list-style-type: none"> <li>Maari Ma Health Aboriginal Corporation in far west NSW commenced with ABCD Program</li> </ul>                                                                                                                                                                                 |
| 2011 – 2014                                                      | <ul style="list-style-type: none"> <li>Maari Ma Health Aboriginal Corporation participates in the ABCD National Research Partnership</li> </ul>                                                                                                                                                                      |

| <b>Western Australia</b> |                                                                                                                                                                                                                                                                                                        |
|--------------------------|--------------------------------------------------------------------------------------------------------------------------------------------------------------------------------------------------------------------------------------------------------------------------------------------------------|
| 2005                     | <ul style="list-style-type: none"> <li>• ABCD Extension phase supported development of a CQI hub in WA</li> <li>• Several ACCHS and WA health services participated in the ABCD National Research Partnership, with WA ABCD Project Officer supported by funding from the Lowitja Institute</li> </ul> |
| 2011 – 2014              |                                                                                                                                                                                                                                                                                                        |

Notes: ABCD – Audit and Best Practice for Chronic Disease; ACCHO - Aboriginal Community-Controlled Health Organisation; ACCHS – Aboriginal Community-Controlled Health Service; ACHSA – Aboriginal Health Council of South Australia; AHCWA – Aboriginal Health Council of Western Australia; AH&MRC – Aboriginal Health and Medical Research Council; CQI – continuous quality improvement; NSW – New South Wales; NT – Northern Territory; PHC – primary health care; QAIHC – Queensland Aboriginal and Islander Health Council; QLD – Queensland; SA – South Australia; WA – Western Australia.

A total of 286 Indigenous PHC services used ABCD standard tools and reported data through the One21seventy web-based information system between 2005 and 2014. Of these health services, 175 voluntarily provided de-identified clinical audit data for analysis and reporting.

#### *Northern Territory*

The most substantial early uptake of the CQI tools was in the NT (Table 2; Figure 2; Additional file 3) where they were implemented in 12 health services following the first evidence of their success.[3] There was a decline in the use of the tools in the NT in 2010, the final year of the extension phase of the ABCD research project, followed by a large increase in use the following year. This increase coincided both with the establishment of One21seventy as a service support agency for using ABCD CQI tools and processes, and with the commencement of the NT CQI Strategy and corresponding funding support. The use of ABCD CQI tools plateaued over the period 2012-2014. An external evaluation commissioned by the NT Government supported sustainability and embedding of processes.[18]

[INSERT FIGURE 2]

#### *Queensland*

In QLD, use of the ABCD CQI tools commenced in 2007/8, with the engagement of QLD Health and some community-controlled PHC services (largely in the north of the state) in the

1 ABCD Program (Table 2; Figure 2; Additional file 3). This followed an internal review of  
2 evidence on improving health care delivery, and subsequent recommendations to increase  
3 investment in CQI in 2008 and again in 2010. There was a rapid increase in the use of the  
4 tools to a peak in 2011 and 2012, following the second investment by QLD Health in CQI  
5 coordinators and facilitators and in supporting health services to access ABCD tools and the  
6 One21seventy web-based information system. There was a marked decline in the use of the  
7 ABCD CQI tools in 2013 and 2014, following the change in Government in 2012, a lack of  
8 policy support and cuts in funding.

### 9 10 *New South Wales*

11 Use of the ABCD CQI tools in NSW peaked in 2008 and 2009, but declined as the state's  
12 early leading exponent of CQI, Maari Ma Health Aboriginal Corporation in Broken Hill,  
13 shifted attention to using the ABCD audit tools in selected aspects of clinical care and  
14 applying CQI techniques to the management of various organizational systems and processes  
15 (Table 2; Figure 2; Additional file 3). There was some continuing use of ABCD CQI tools in  
16 Maari Ma Health and in other NSW services despite the absence of direct support for the use  
17 of these tools from NSW health authorities.

### 18 19 *Western Australia*

20 In WA, use of the ABCD CQI tools increased from 2005 to a peak in 2008 and 2009 across  
21 several health services (Table 2; Figure 2; Additional file 3). The decline in usage coincided  
22 with the end of ABCD's extension phase, but a number of health services continued to use  
23 the tools despite relatively limited engagement with ongoing research and no direct support  
24 from WA health authorities.

### 25 26 *South Australia*

27 A small number of services used the ABCD CQI tools in SA between 2006 and 2010, and  
28 slightly more between 2011 and 2014 – the increase coinciding with provision of limited  
29 funding and policy support from research and SA health (Table 2; Figure 2; Additional file  
30 3). This policy support occurred after an internal review (similar to QLD) on the evidence  
31 and best options to improving delivery of care.

### 32 33 *Trends in quality of care*

34



The QCI of adherence to best practice guidelines for health services in the NT generally show improvement over audit cycles and over successive years. More specifically, between audit cycles 1 and 4 the median % of services delivered for participating health centres increased by more than 25% for overall preventive care, and by about 10% for overall type 2 diabetes care and overall child health care (Additional file 2; Table 3). There was also improvement in the median % of services delivered in successive years for all four areas of care. The improvement in the NT is accompanied by a reduction in variation between health services for preventive care and child health QCI, due to improvement among poorer performing health services.

[INSERT Table 3]

**Table 3: Summary of care quality trends over years and CQI cycles in Northern Territory and Queensland.** See Additional file 2 for more detailed data.

| <i>Area of Care</i> | Trend over time |     | Trend over CQI cycles |     | Variation over CQI cycles |     |                     |
|---------------------|-----------------|-----|-----------------------|-----|---------------------------|-----|---------------------|
|                     | NT              | QLD | NT                    | QLD | NT                        | QLD |                     |
| Diabetes            | ↑               | ~   | ↑                     | ~   | *                         | ~   |                     |
| Preventive          | ↑               | ~   | ↑                     | ~   | ~                         | ~   |                     |
| Child               | ↑               | ↓   | ↑                     | ~   | ~                         | ~   |                     |
| Maternal            | ↑               | ↑   | ↑                     | ↑   | *                         | ~   |                     |
| Legend:             | ↑ Improvement   |     | ~ No change           |     | ↓ Decrease                |     | * Reduced variation |

Notes: NT – Northern Territory; QLD – Queensland; CQI –continuous quality improvement

In QLD, the QCI of adherence to best practice guidelines show a mixed picture. There was improvement in the median % of services delivered for participating health services between audit cycles 1 and 4 of about 15% for overall antenatal care. For overall type 2 diabetes care and overall preventive care there was an increase in the median % of services delivered of about 10% and 5% respectively between audit cycles 1 and 3, followed by a decline at audit cycle 4 (Additional file 2; Table 3). There was no clear trend for diabetes care over successive years or over audit cycles, or for preventive care over time. There was a declining trend over successive years and no clear increasing or decreasing trend over audit cycles for child health. Nor was there a clear reduction in variation between health services in any of the

1 four areas of care over time or over audit cycles.

2  
3 The multi-level linear regression analyses showed that there was a significant difference  
4 between the two jurisdictions for preventive and diabetes care. After adjusting for year of  
5 audit and number of cycles completed, the predicted increase in adherence to best practice for  
6 NT compared to QLD health services was 12% (95%CI: 5.61-17.70;  $p < 0.0001$ ) and 16%  
7 (95%CI: 11.87-19.58;  $p < 0.0001$ ) for preventive and diabetes care respectively. Jurisdictional  
8 location accounted for 17% and 18.2% of the explained variability in adherence to best  
9 practice guidelines for both. There was no significant difference between jurisdictions in  
10 relation to child or maternal care (Table 4).

11  
12 [INSERT Table 4]

13  
14 **Table 4: Estimated effect of jurisdictional location on care quality (% increase in**  
15 **services) for each area of care\***  
16

|                                    | Preventive Health<br>(n=75 services;<br>9,627 audit records) |         |                 | Type 2 Diabetes<br>(n=95; 10,103) |         |                 |
|------------------------------------|--------------------------------------------------------------|---------|-----------------|-----------------------------------|---------|-----------------|
|                                    | Coef                                                         | p-value | 95% CIs         | Coef                              | p-value | 95% CIs         |
| Audit Year                         | 4.23                                                         | <0.0001 | (3.22 - 5.23)   | 2.44                              | <0.0001 | (1.84 - 3.04)   |
| Audit Cycle                        | -1.14                                                        | 0.08    | (-2.43 - 0.15)  | 0.64                              | 0.12    | (-0.17 - 1.45)  |
| Jurisdiction<br>(QLD<br>reference) | 11.66                                                        | <0.0001 | (5.61 - 17.70)  | 15.73                             | <0.0001 | (11.87 - 19.58) |
| LRTest $\chi^2$<br>(1df)           | 13.65(p=0.0002)                                              |         |                 | 50.13(p<0.0001)                   |         |                 |
| VPC                                | 17.0%                                                        |         |                 | 18.2%                             |         |                 |
|                                    | Child Health<br>(n=74; 6,724)                                |         |                 | Maternal Health<br>(n=38; 2,180)  |         |                 |
|                                    | Coef                                                         | p-value | 95% CIs         | Coef                              | p-value | 95% CIs         |
| Audit Year                         | 0.67                                                         | 0.28    | (-0.53-1.87)    | -0.97                             | 0.025   | (-1.82 - -0.12) |
| Audit Cycle                        | 0.74                                                         | 0.37    | (-0.89 - 2.36)  | 6.10                              | <0.0001 | (4.78-7.42)     |
| Jurisdiction<br>(QLD<br>reference) | 4.98                                                         | 0.07    | (-0.42 - 10.38) | -2.38                             | 0.27    | (-6.59 - 1.83)  |
| LRTest $\chi^2$<br>(1df)           | 3.22(p=0.07)                                                 |         |                 | 1.22(p=0.27)                      |         |                 |
| VPC                                | 15.0%                                                        |         |                 | 16.6%                             |         |                 |

17

1 \* As measured by the Quality of Care Index (QCI)  
2 Coef = Coefficient  
3 CI = confidence interval  
4 LRTest = Likelihood Ratio Test  
5 QLD = Queensland  
6 VPC = Variance Partition Coefficient

## 8 DISCUSSION

9 Progressive and sustained uptake of ABCD tools occurred in the NT in the context of  
10 consistent long-term policy and infrastructure support for CQI. This contrasted with a) a  
11 rapid rise and subsequent fall in uptake of these tools in QLD where the initial high-level  
12 policy and infrastructure support was not sustained following a change of government in  
13 2012; and b) low levels of uptake in jurisdictions with relatively less policy and infrastructure  
14 support (NSW, WA, SA). The consistent long-term policy and infrastructure support for CQI  
15 in the NT was also associated with steady improvements or maintenance of high-quality care  
16 (as reflected in clinical best practice guidelines) for the four aspects of care that were the  
17 major focus of ABCD CQI efforts, and reduction in variation between health services for two  
18 of these. This contrasted with the situation in QLD where there was a relatively limited effect  
19 on adherence to best practice guidelines and on variation between health services.

21 While this study does not provide an in-depth examination of the complex processes that  
22 might explain different trends in the uptake of tools, or how CQI processes have impacted on  
23 quality of care in different jurisdictions, some insight has been provided by previous studies  
24 of the ABCD CQI program [11,15, 19-24] and the evaluation of the NT CQI Strategy. [18]  
25 Gardner highlighted the complexity of the process of uptake of CQI, and the critical role of  
26 alignment of policies and incentives; a systems approach; organization-wide commitment;  
27 leadership at all levels; and resources to support implementation.[19] Our findings of  
28 relatively low uptake of CQI in jurisdictions with limited policy and infrastructure support,  
29 and the rapid drop in use of CQI tools when policy, infrastructure and funding support was  
30 withdrawn in QLD, highlights the critical role these play in supporting its uptake. In these  
31 states, the lack of clear and consistent policy direction, resourcing and sustained high-level  
32 leadership and management support for CQI, and relative lack of engagement in wide-scale  
33 CQI research has led to a diversity of locally driven initiatives with an associated lack of  
34 systematic analysis and reporting of data for CQI purposes. This appears to have been a

1 barrier to demonstrably effective uptake of CQI in many Indigenous PHC services between  
2 2005 and 2014.

3  
4 The limited availability of data for systematic analysis and reporting of relevant data, other  
5 than in QLD and NT, has precluded meaningful analysis of adherence to best practice  
6 guidelines for most states/territories. The first report on national Key Performance Indicators  
7 (nKPIs) from Indigenous PHC organizations showed that in 2012-13 those in QLD and the  
8 NT performed better against almost all process-of-care indicators,[25] attributing this to the  
9 relatively well-established CQI programs in these jurisdictions. The third and most recent  
10 nKPI report, which includes data up to December 2014,[26] shows improvements for 17 of  
11 the 19 process-of-care measures for all jurisdictions combined, with continued relatively high  
12 performance in the NT and QLD and most marked recent improvement in WA. The analysis  
13 presented in this paper points to the importance of high-level policy support and resourcing  
14 for implementation of systematic CQI processes to enhance quality of care. The relatively  
15 high performance, and the greater ability to report nKPI data, in the NT and QLD  
16 demonstrate the benefits of systematic CQI processes for reporting of data on KPIs as well as  
17 for enhancing quality of care.

18  
19 The independent evaluation of the NT CQI Strategy provides important insights into the  
20 relative success of CQI initiatives in the NT. There has been no comparable publicly  
21 available independent evaluation in QLD, NSW, WA or SA, and it may be that an external  
22 evaluation such as that of the Strategy plays a role in ensuring sustainability and momentum.  
23 The formalized collaborative engagement of the community-controlled and government  
24 sectors in the NT through the Aboriginal Health Forum, and the shared commitment and  
25 enthusiasm for a territory-wide CQI Strategy, have also contributed to the achievements in  
26 the NT. Given the importance of working effectively together to respond to the complex care  
27 needs of Indigenous patients, it appears that a partnership approach adopted across service  
28 sectors is a critical component underpinning efforts in improving quality of care.

29  
30 Another important component has been the adaptation of collaborative methods to sustain the  
31 engagement of experienced front-line service providers and managers, such as bringing them  
32 together to share learnings. Together with sustained investment, the shared commitment and  
33 enthusiastic engagement in CQI in the NT is likely to have engendered the sense of collective  
34 efficacy and collective valuing of CQI data that has led to the effectiveness of CQI.[11]

1  
2  
3  
4  
5  
6  
7  
8  
9  
10  
11  
12  
13  
14  
15  
16  
17  
18  
19  
20  
21  
22  
23  
24  
25  
26  
27  
28  
29  
30  
31  
32  
33  
34  
35  
36  
37  
38  
39  
40  
41  
42  
43  
44  
45  
46  
47  
48  
49  
50  
51  
52  
53  
54  
55  
56  
57  
58  
59  
60

1  
2 An important limitation of our study is that it is not possible to determine clearly the extent to  
3 which trends in data on quality of care have been influenced by policy support for the ABCD  
4 CQI program or to other initiatives (e.g. funding, workforce or infrastructure developments).  
5 The difficulty of demonstrating causality is common to much policy research,[27] however  
6 we argue here for contribution rather than attribution. Improvements to the quality of care in  
7 NT built on substantial earlier initiatives, including electronic patient information record  
8 systems, the development and implementation of a Chronic Disease Strategy and sustained  
9 commitment to workforce development.

10  
11 The ABCD data are not representative of all Indigenous PHC services. There was variable  
12 participation in different jurisdictions and by government-operated and community-  
13 controlled health services. For example, in the NT there were substantial numbers of both  
14 service types participating in ABCD, but relatively low numbers of community-controlled  
15 services in QLD. The ABCD data need to be interpreted in relation to a range of other CQI  
16 activities in Indigenous PHC services over the period for which data has been  
17 reported[10,12]. While there were some substantial initiatives, particularly in the NT and  
18 QLD, most CQI initiatives were small scale, narrow in scope and without the capability to  
19 analyze and report consistent data to the extent possible through ABCD. Nor has it been  
20 possible to assess systematically these CQI activities or their impact on quality of care. In  
21 addition, there were a range of non-CQI initiatives at the national [e.g. Indigenous Chronic  
22 Disease Package] [28] and local levels, which may have impacted on quality of care over the  
23 period for which we have reported data. More generally, as with all research of this type it is  
24 vital to consider historical, socioeconomic and health service and system contexts in  
25 assessing the generalizability or transferability of the findings to other primary healthcare  
26 settings in Australia or internationally.

27  
28 The authors of this paper have all had longstanding involvement with the ABCD Program as  
29 researchers, service providers, managers or policy makers/advisors. While our interest in  
30 ABCD may have influenced our interpretation of the data, the diversity of roles, insights and  
31 perspectives that we bring allows for critical reflection in the interpretation of the data, and  
32 brings rigor to this type of research.[27]

33

1 The ABCD experience, as reflected in this paper, has important implications for practice,  
2 policy and further research, including the implementation of the National CQI Framework for  
3 Aboriginal and Torres Strait Islander PHC.[10] For clinical staff and management of health  
4 services, the benefits of participating in this type of collaborative program include access to a  
5 CQI system that provides data on recent performance and trend data across the broad scope  
6 of primary care, and the ability to benchmark against other services at the regional,  
7 state/territory and national level. For policy professionals, benefits include the ability to  
8 monitor adherence to best practice guidelines at all levels, and to target improvements to  
9 specific aspects or modes of care, [24] population groups (e.g. children or the elderly) or  
10 geographic locations. An important challenge for ongoing and new CQI initiatives is to  
11 enhance local ownership and engagement, while ensuring the use of standard tools and  
12 supporting the analytical capability that enables the use of consistent good quality data for  
13 CQI purposes at multiple levels of the system. Sustaining efforts to deliver the best care  
14 according to changing evidence over time remains important and warrants further attention.

## 15 16 **CONCLUSION**

17 Our study adds to the accumulating evidence on the conditions that enable CQI efforts to be  
18 most effective. The findings show the potential contribution that systematic and sustained  
19 policy and infrastructure support can make to wide-scale uptake and to the effectiveness of  
20 CQI methods in improving the quality of care. It is now about 10 years since our first  
21 published paper on the potential for CQI to enhance the quality of health care for Indigenous  
22 Australians. With the development of a National CQI Framework in 2015 [10] it appears we  
23 may be at the dawn of a new era of wide-scale and systematic use of CQI methods. While  
24 local efforts are vital to the effective use of CQI methods, state/territory-level policy and  
25 resources will be critical to building capability and a supportive environment.

## 26 27 **Figure List**

28 Figure 1: Distribution and use of ABCD Program continuous quality improvement tools in  
29 health services, over time, as at 2007, 2011 and 2015

30 Figure 2: Uptake of ABCD continuous quality improvement tools and major policy  
31 influences on trends in Northern Territory and Queensland

## 32 33 **List of abbreviations**

- 1  
2  
3 1 ABCD: Audit and Best Practice in Chronic Disease  
4  
5 2 CQI: Continuous Quality Improvement  
6  
7 3 PHC: Primary Health Care  
8  
9  
10 4 nKPI: National Key Performance Indicators  
11  
12 5 NSW: New South Wales  
13  
14 6 NT: Northern Territory  
15  
16 7 QCI: Quality of Care Index  
17  
18 8 QLD: Queensland  
19  
20  
21 9 SA: South Australia  
22  
23 10 WA: Western Australia  
24  
25  
26  
27

## 28 **Consent for publication**

- 29  
30 13 Not applicable  
31  
32

## 33 **Availability of data and material**

- 34  
35  
36 15 The ABCD dataset analyzed during the current study is not publicly available due to health  
37  
38 16 centre confidentiality, but is available from the corresponding author on reasonable request  
39  
40 17 and if consistent with the project's ethics approvals.  
41

## 42 **Authors' contributions**

- 43  
44  
45 19 RB conceived and had the primary role in drafting of the manuscript. VM undertook the  
46  
47 20 quantitative data analysis and had a major role in drafting and review. All other authors (SL,  
48  
49 21 ST, CP, TW, JB, FC, RK, LC) played substantial roles in providing information on QI  
50  
51 22 initiatives in various states and territories, in analysis and interpretation of data, and review of  
52  
53 23 successive drafts of the manuscript. All authors read and approved the final manuscript.  
54

## 55 **Competing interests**

1 RB was the Scientific Director of One21seventy, a not-for-profit entity within Menzies  
2 School of Health Research that provided CQI support on a fee for service basis to primary  
3 healthcare services across Australia. RB is also the lead investigator on the ABCD Research  
4 Program, and other authors are co-investigators. None of the authors received financial  
5 support from One21seventy, and One21seventy did not provide any financial support for the  
6 preparation of this manuscript. The authors have no other competing interests in the  
7 preparation of this manuscript.

## 8 9 **Acknowledgements**

10 The development of this manuscript would not have been possible without the active support,  
11 enthusiasm and commitment of staff in participating primary health care services, and  
12 members of the ABCD National Research Partnership and the Centre for Research  
13 Excellence in Integrated Quality Improvement.

## 14 15 16 **Funding**

17 The National Health and Medical Research Council has funded the ABCD National Research  
18 Partnership Project (#545267) and the Centre for Research Excellence in Integrated Quality  
19 Improvement (#1078927). In-kind and financial support has been provided by the Lowitja  
20 Institute and a range of Community-Controlled and Government agencies.

## 21 22 **Ethics**

23 Ethics approval was obtained from human research ethics committees (HRECs) in each  
24 jurisdiction: Northern Territory HREC-EC00153 & HREC-12-53; New South Wales  
25 HREC/11/GWAHS/23; Queensland HREC/11/QTDD/47; South Australia Aboriginal Health  
26 Research Ethics Committee 04-10-319; Western Australia Curtin University HR140/2008;  
27 WA Country Health Services 2011/27; WA Aboriginal Health Information and Ethics  
28 Committee 111-8/05; University of Western Australia RA/4/1/5051.

## 29 30 **REFERENCES**

- 31  
32 1. Grol R, Grimshaw J. From best evidence to best practice: effective implementation of  
33 change in patients' care. *Lancet*. 2003;362(9391):1225-30.  
34



1  
2  
3  
4  
5  
6  
7  
8  
9  
10  
11  
12  
13  
14  
15  
16  
17  
18  
19  
20  
21  
22  
23  
24  
25  
26  
27  
28  
29  
30  
31  
32  
33  
34  
35  
36  
37  
38  
39  
40  
41  
42  
43  
44  
45  
46  
47  
48  
49  
50  
51  
52  
53  
54  
55  
56  
57  
58  
59  
60

1. Tricco A, Ivers N, Grimshaw J, et al. Effectiveness of quality improvement strategies on the management of diabetes: a systematic review and meta-analysis. *Lancet*. 2012;379(9833):2252-61.
2. Bailie R, Si D, Shannon C, et al. Study protocol: national research partnership to improve primary health care performance and outcomes for Indigenous peoples. *BMC Health Serv Res*. 2010;10(1):1.
3. Si D, Bailie R, Dowden M, et al. Assessing quality of diabetes care and its variation in Aboriginal community health centres in Australia. *Diabetes Metab Res Rev*. 2010;26(6):464-73.
4. Australian Institute of Health and Welfare. The Health and Welfare of Australia's Aboriginal and Torres Strait Islander Peoples 2015. Cat. no. IHW 147. Canberra: AIHW.2015.
5. Bailie J, Schierhout G, Laycock A, et al. Determinants of access to chronic illness care: a mixed-methods evaluation of a national multifaceted chronic disease package for Indigenous Australians. *BMJ open*. 2015 Nov 1;5(11):e008103.
6. Lau R, Stevenson F, Ong B, et al. Achieving change in primary care—causes of the evidence to practice gap: systematic reviews of reviews. *Implement Sci*. 2016;11(1):1.
7. Ferlie E, Shortell S. Improving the quality of health care in the United Kingdom and the United States: a framework for change. *Milbank Q*. 2001;79(2):281-315.
8. Epping-Jordan J, Pruitt S, Bengoa R, Wagner EH. Improving the quality of health care for chronic conditions. *Qual Safety Health Care*. 2004;13(4):299-305.
9. Lowitja Institute. Draft Final Report: Recommendations for a National CQI Framework for Aboriginal and Torres Strait Islander Primary Health Care. 2014;prepared for the Commonwealth Department of Health, Canberra.
10. Schierhout G, Hains J, Si D, et al. Evaluating the effectiveness of a multifaceted, multilevel continuous quality improvement program in PHC: developing a realist theory of change. *Implement Sci*. 2013;8:119.
11. Wise M, Angus S, Harris E, Parker S. Appraisal of Continuous Quality Improvement Initiatives in Aboriginal and Torres Strait Islander Primary Health Care. 2013;Prepared for the Lowitja Institute, Melbourne.
12. Laycock A, Bailie J, Matthews V, Bailie R. Interactive dissemination: engaging stakeholders in the use of aggregated quality improvement data for system-wide change in Australian Indigenous primary health care. *Frontiers in public health*. 2016;4.
13. Cunningham F, Ferguson-Hill S, Matthews V, Bailie R. Leveraging quality improvement through use of the Systems Assessment Tool in Indigenous primary health care services: a mixed methods study. *BMC Health Serv Res*. 2016 Oct 18;16(1):583.

15. Matthews V, Schierhout G, McBroom J, et al. Duration of participation in continuous quality improvement: a key factor explaining improved delivery of Type 2 diabetes services. *BMC Health Serv Res.* 2014;14(1):1.
16. Bailie R, Matthews V, Brands J, Schierhout G. A systems-based partnership learning model for strengthening primary healthcare. *Implementation Science.* 2013 Dec 17;8(1):143.
17. Bailie J, Schierhout G, Cunningham F, et al. Quality of PHC for Aboriginal and Torres Strait Islander People in Australia. Key Research Findings and Messages for Action from the ABCD National Research Partnership Project. Brisbane: Menzies School of Health Research; 2015. < <http://apo.org.au/system/files/55532/apo-nid55532-14486.pdf>>, accessed 21<sup>st</sup> June 2016.
18. Allen and Clark. Evaluation of the Northern Territory CQI Investment Strategy, Department of Health 2013, Canberra.
19. Gardner KL, Dowden M, Togni S, Bailie R. Understanding uptake of continuous quality improvement in Indigenous primary health care: lessons from a multi-site case study of the Audit and Best Practice for Chronic Disease project. *Implement Sci.* 2010;5(1):1.
20. Bailie C, Matthews V, Bailie J, et al. Determinants and gaps in Preventive care Delivery for Indigenous Australians: a cross-sectional analysis. *Front. Public Health.* 2016;4.
21. Larkins S, Woods CE, Matthews V, et al. Responses of Aboriginal and Torres Strait Islander Primary health-care Services to Continuous Quality Improvement Initiatives. *Front. Public health.* 2015;3.
22. Gibson-Helm M, Rumbold A, Teede H, et al. Improving the provision of pregnancy care for Aboriginal and Torres Strait Islander women: a continuous quality improvement initiative. *BMC Pregnancy and Childbirth.* 2016;16(1):1.
23. Vasant B, Matthews V, Burgess C, et al. Wide Variation in absolute cardiovascular risk assessment in Aboriginal and Torres Strait Islander People with Type 2 Diabetes. *Front. Public Health.* 2016;4.
24. Schierhout G, Matthews V, Connors C, et al. Improvement in delivery of type 2 diabetes services differs by mode of care: a retrospective longitudinal analysis in the Aboriginal and Torres Strait Islander Primary Health Care setting. *BMC Health Serv Res.* 2016;16(1):560.
25. Australian Institute of Health and Welfare 2014. National Key Performance Indicators for Aboriginal and Torres Strait Islander primary health care: first national results June 2012 to June 2013. National key performance indicators for Aboriginal and Torres Strait Islander primary health care series. Cat no. IHW 123. Canberra: AIHW.

1  
2  
3  
4  
5  
6  
7  
8  
9  
10  
11  
12  
13  
14  
15  
16  
17  
18  
19  
20  
21  
22  
23  
24  
25  
26  
27  
28  
29  
30  
31  
32  
33  
34  
35  
36  
37  
38  
39  
40  
41  
42  
43  
44  
45  
46  
47  
48  
49  
50  
51  
52  
53  
54  
55  
56  
57  
58  
59  
60

- 1 26. Australian Institute of Health and Welfare 2015. National Key Performance Indicators  
2 for Aboriginal and Torres Strait Islander primary health care: results from December  
3 2014. National key performance indicators for Aboriginal and Torres Strait Islander  
4 primary health care series no.3. Cat. no. IHW 161. Canberra: AIHW.  
5  
6  
7  
8 27. Walt G, Shiffman J, Schneider H, et al. 'Doing' health policy analysis:  
9 methodological and conceptual reflections and challenges. Health Policy and  
10 Planning. 2008;23(5):308-17.  
11  
12  
13 28. Bailie R, Griffin J, Kelaher M, et al. Sentinel sites evaluation: final report. Report  
14 prepared by Menzies School of Health Research for the Australian Government  
15 Department of Health and Ageing, Canberra. 2013.  
16  
17  
18  
19  
20  
21  
22  
23  
24  
25  
26  
27  
28  
29  
30  
31  
32  
33  
34  
35  
36  
37  
38  
39  
40  
41  
42  
43  
44  
45  
46  
47  
48  
49  
50  
51  
52  
53  
54  
55  
56  
57  
58  
59  
60

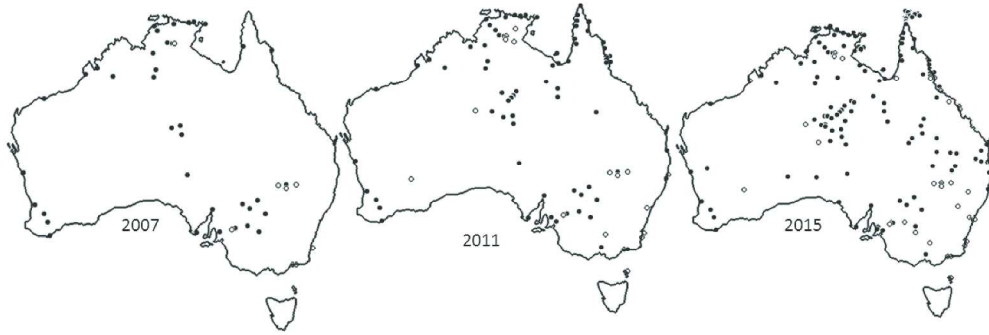

331x111mm (300 x 300 DPI)

peer review only

1  
2  
3  
4  
5  
6  
7  
8  
9  
10  
11  
12  
13  
14  
15  
16  
17  
18  
19  
20  
21  
22  
23  
24  
25  
26  
27  
28  
29  
30  
31  
32  
33  
34  
35  
36  
37  
38  
39  
40  
41  
42  
43  
44  
45  
46  
47  
48  
49  
50  
51  
52  
53  
54  
55  
56  
57  
58  
59  
60

1  
2  
3  
4  
5  
6  
7  
8  
9  
10  
11  
12  
13  
14  
15  
16  
17  
18  
19  
20  
21  
22  
23  
24  
25  
26  
27  
28  
29  
30  
31  
32  
33  
34  
35  
36  
37  
38  
39  
40  
41  
42  
43  
44  
45  
46  
47  
48  
49  
50  
51  
52  
53  
54  
55  
56  
57  
58  
59  
60

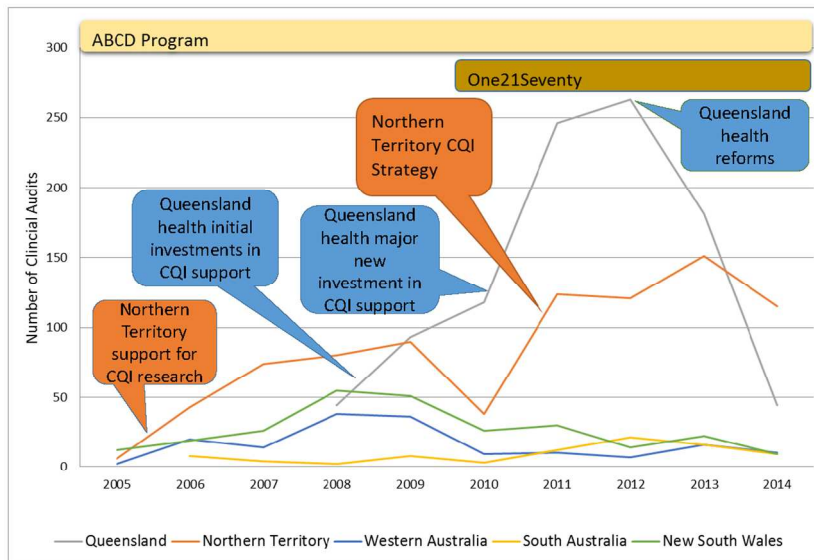

338x190mm (300 x 300 DPI)

review only

### Additional File 1: Clinical audit process, sample size and audit inclusion criteria

**Conduct and reporting of clinical audits** – audits were generally done by health service staff, trained in the use of standard tools and supported by quality improvement facilitators and continuous quality improvement (CQI) program staff. Where appropriate health service staff were not available, the audits were done by trained CQI facilitators working in state/territory CQI support roles. Data were collected using standardised CQI tools, entered into a web-based information system, and analysed through an automated process, with reports made available to health services in real time for use in local quality improvement processes. Reports of aggregated data for clusters of health services, by region or state, were also available through the web-based information system to support regional or state/territory level CQI efforts.

**Sampling and sample size** for Preventive care, Diabetes, Maternal and Child health audits. Where the eligible population was 30 clients or less, the audit protocol recommended including all records. Where the eligible population was greater than 30, the protocol provided guidance on the random selection of records, with the number depending on the precision of estimates required by health service staff. A new sample was used for each audit period. For Preventive care and Child health, the samples were stratified by age and gender; for Diabetes care samples were stratified by gender.

| <i>Preventive care</i>                                                                                                                                                                                                                                                                                                                       | <i>Diabetes</i>                                                                                                                                                                                                                                                                              | <i>Child health</i>                                                                                                                                                                                                                                                                                                        | <i>Maternal health</i>                                                                                                                                                                                                |
|----------------------------------------------------------------------------------------------------------------------------------------------------------------------------------------------------------------------------------------------------------------------------------------------------------------------------------------------|----------------------------------------------------------------------------------------------------------------------------------------------------------------------------------------------------------------------------------------------------------------------------------------------|----------------------------------------------------------------------------------------------------------------------------------------------------------------------------------------------------------------------------------------------------------------------------------------------------------------------------|-----------------------------------------------------------------------------------------------------------------------------------------------------------------------------------------------------------------------|
| Included clients must: be between 15 and up to 55 years; have no diagnosis of diabetes, hypertension, coronary heart disease, chronic heart failure, rheumatic heart disease or chronic kidney disease; not be pregnant or less than 6 weeks postpartum; and have been resident in the community for 6 months or more in the last 12 months. | Included clients must: have a clear, documented diagnosis of Type 2 Diabetes; be 15 years or older; and have been a resident in the community for 6 months or more in the last 12 months. Clients are excluded if they have Type 1 diabetes, gestational diabetes or autoimmune nephropathy. | Included children must: have been resident in the community for 6 months or more of the past 12 months (or if the child is <12 months, resident in the community for at least half of the time since birth); and have no major health anomaly such as Down Syndrome, cerebral palsy, heart defects or inherited disorders. | Included women must: have an infant between 2 and 14 months; have been resident in the community for 6 months of the infant's gestation; and have used the health service as the usual source of primary health care. |

## Additional File 2 – Quality of Care Index for preventive care, diabetes care, child health and maternal health care, 2005–2014

### Reading the box plots

The box plots show the median, mean, 25th and 75th centile and range between health services for each jurisdiction, year and audit cycle. They also show outliers, defined as health services where the value for the indicator is more than 1.5 times the difference between the 25th and 75th centile from the median.

### Preventive care (2005–2014)

QCI includes (up to 15 service items): weight, waist circumference, blood pressure, urinalysis, blood glucose levels, oral health check, nutrition & physical activity brief intervention, smoking & alcohol use recorded and brief interventions where required, sexually transmitted infection check (gonorrhoea, chlamydia & syphilis) and pap smear.

### Northern Territory

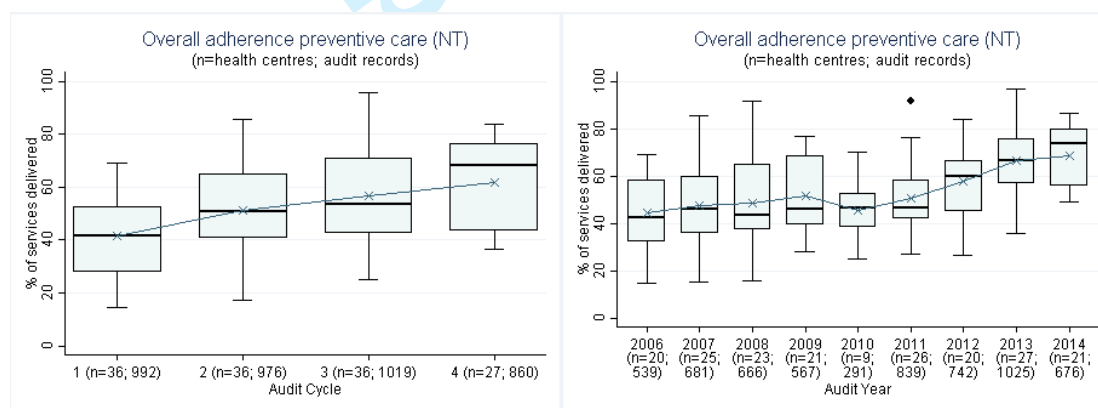

### Queensland

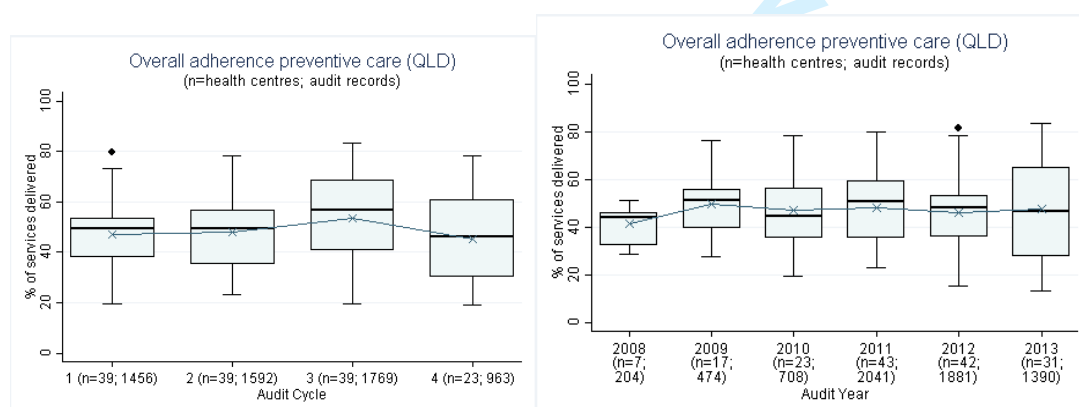

Figure 2.1: Mean percent QCI services delivered to well clients per health service, by audit cycle (health services that have at least 3 years of audit data) and by audit year (all health services), NT and QLD (n=number of health services; number of client records audited who attended in previous 24 months)

**Diabetes care (2005–2014)**

QCI includes (up to 22 service items): GP Management Plan, record of discussion on chronic disease management & medications, influenza & pneumococcal vaccination, blood pressure, smoking & alcohol use recorded and brief intervention where required, weight, waist circumference, nutrition & physical activity brief intervention, ACR, lipids, cholesterol, eGFR, body mass index, visual acuity, dilated eye check, feet check, HbA1c.

Northern Territory

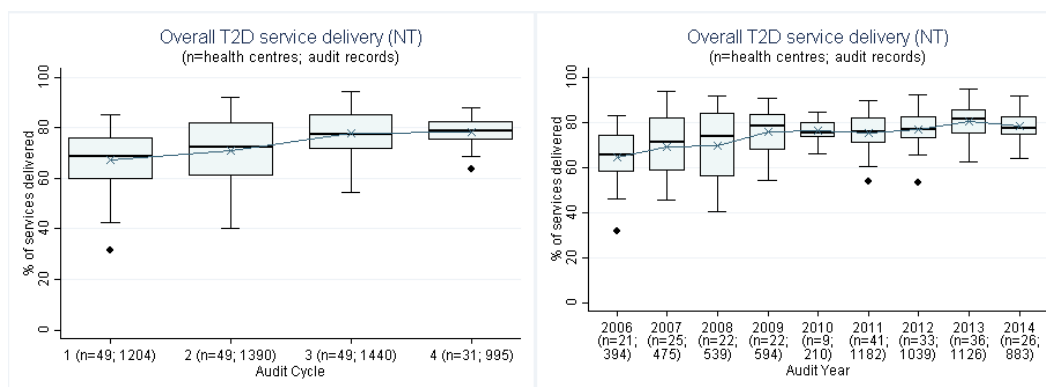

Queensland

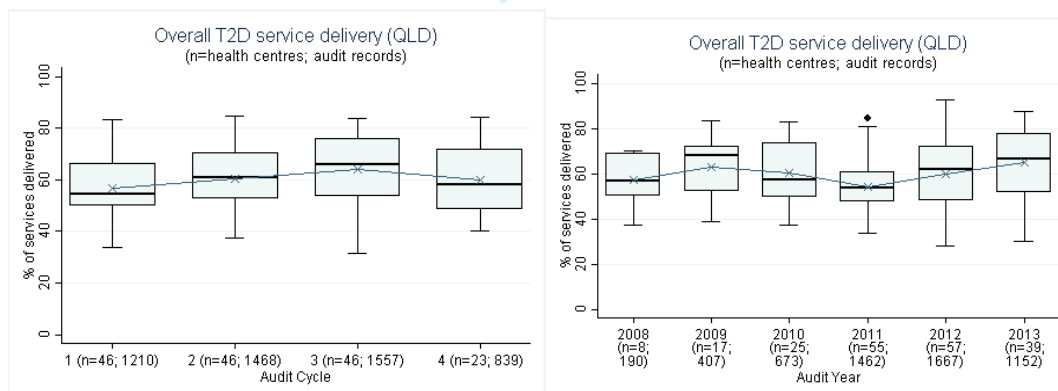

Figure 2.2: Mean percent QCI services delivered to patients with Type 2 diabetes per health service, by audit cycle (health services that have at least 3 years of audit data) and by audit year (all health services), NT and QLD (n=number of health services; number of client records audited who attended in previous 12 months)



### Child health (2007–2014)

QCI includes up to 10 service items: weight, height, ear exam, nutrition, head circumference, hip exam, sudden infant death syndrome prevention advice, breastfeeding advice, developmental check, testes check.

#### Northern Territory

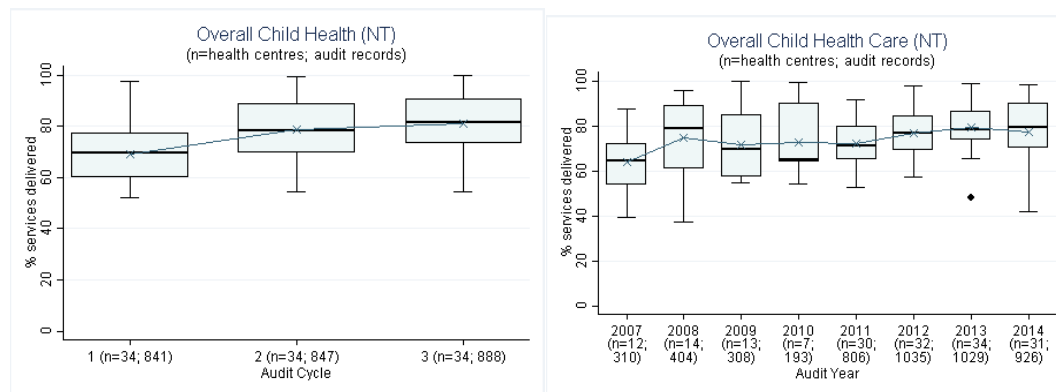

#### Queensland

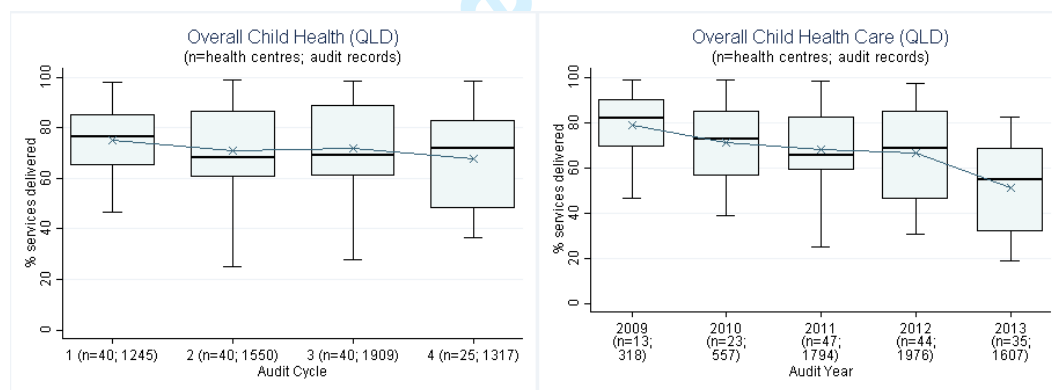

Figure 2.3: Mean percent QCI services delivered to children per health service, by audit cycle (health services that have at least 3 years of audit data) and by audit year (all health services), NT and QLD (n=number of health services; number of child records audited who attended in previous 12 months)

**Maternal health (2007–2014)**

The antenatal QCI includes 26 best practice service items present in the maternal health audit tool:  $\geq 7$  antenatal visits, estimated gestational age  $\leq 13$  weeks at first antenatal visit, blood pressure (1st, 2nd & 3rd trimester), urinalysis (1st & 2nd trimester), BMI (1st trimester), fundal height (2nd & 3rd trimester), fetal movements (3rd trimester), blood glucose (2nd trimester), documentation of blood group, antibody status, rubella, Hepatitis B status, mid-stream urine, full blood examination, Syphilis serology, HIV, PCR test, smoking and alcohol use status recorded (1st & 3rd trimester), social risk and emotional wellbeing assessments, planning for care and birthing, nutrition, breastfeeding, domestic and social environment, and cultural considerations.

**Northern Territory**

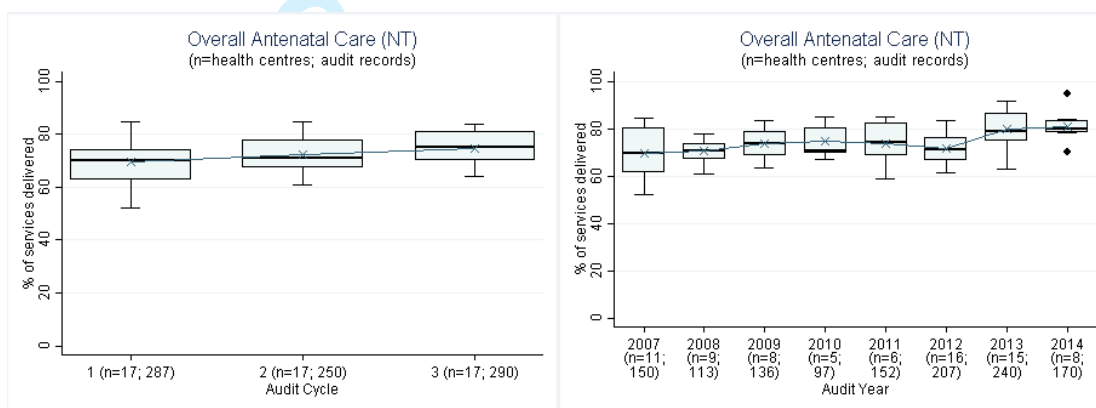

**Queensland**

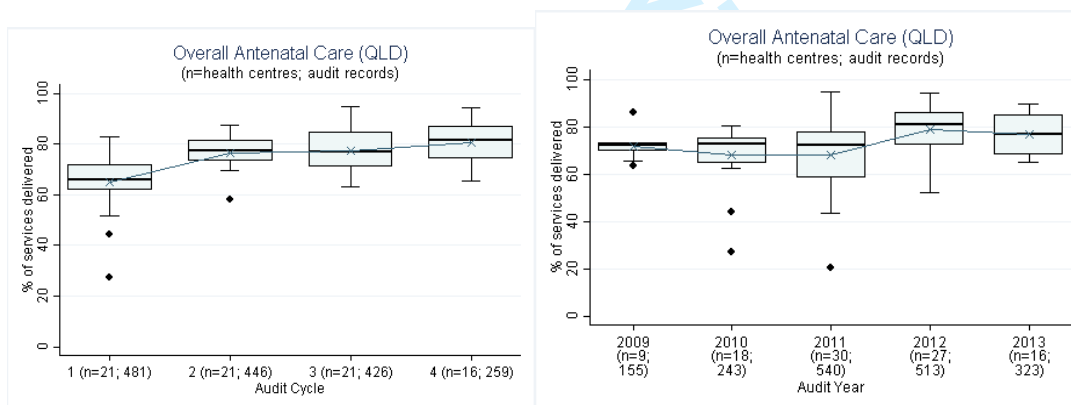

Figure 2.4: Mean percent QCI services delivered to pregnant women per health service, by audit cycle (health services that have at least 3 years of audit data) and by audit year (all health services), NT and QLD (n=number of health services; number of client records audited)

### **Additional File 3 – Detailed description of policy context by state and territory**

#### ***Northern Territory***

In early 2009, a Continuous Quality Improvement (CQI) Strategy was endorsed by the Northern Territory (NT) Aboriginal Health Forum – comprising the Commonwealth Department of Health and Ageing (now Department of Health); the NT Department of Health; and the Aboriginal Medical Service Alliance of the Northern Territory (or AMSANT, the peak community-controlled health service body in the NT) – with the goal of building a consistent approach to CQI across the NT Indigenous primary health care (PHC) sector. The NT CQI Strategy was part of a broader Indigenous PHC reform agenda that incorporated the Expanded Health Service Delivery Initiative (EHSDI),[1] which included a substantial increase in funding and an expansion of remote PHC services, a program of regionalization, and the development of key performance indicators (KPIs). The Strategy built on a history of leadership and innovation in Indigenous PHC, including in relation to community control of PHC services, the development and implementation of a Chronic Disease Strategy, guideline development, electronic information systems, and chronic disease management, as well as on the Audit and Best Practice in Chronic Disease (ABCD) CQI work which originated in the NT in 2002.[1,2]

The CQI Strategy included: i) establishment of a Steering Committee (made up of representatives from each of the three organizations’ in the Aboriginal Health Forum); ii) engagement of two CQI Coordinators to provide leadership, advice and training; iii) funding to support CQI Facilitators in each Health Service Delivery Area of the NT; and iv) support for regular CQI Collaborative meetings. By the end of 2012 there were 16 facilitator positions across the NT, and more than 200 health professionals, including 25 Aboriginal Health Workers, had been trained in the use of CQI tools and processes.[3] The CQI Strategy was allocated around \$2.79m per year, with the intention that CQI should be a core PHC activity.[1]

The independent evaluation of the NT CQI Strategy [1] found that it ‘had been successful in establishing the practice of quality improvement across the NT Aboriginal PHC system... to build the beginnings of a system-wide culture of quality improvement’. The Strategy was found to have resulted in an increase in ‘overall CQI capability and capacity’, ‘enthusiasm and fervor among health workers for quality improvement’, ‘wide engagement of health service managers and clinicians in CQI activities’ and had contributed to ‘staff becoming adept at using ePIRS (electronic Patient Information Record Systems) and the data in these systems being improved’. The evaluation highlighted the ABCD CQI tools as providing a ‘solid technical basis for CQI’ and ‘technical rigor behind the approach’, and developing routine clinical information systems to generate and regularly report on agreed Indigenous health KPIs to NT Government-operated services. Under the guidance of the CQI Steering Committee, the NT provided national leadership in developing specialized infrastructure support and workforce capacity for wide-scale implementation of CQI.[3]

#### ***Queensland***

In 2005–2006, the Queensland Government undertook a review both of the readiness of services to commence CQI and of the evidence as to its effectiveness in improving health care delivery. This provided a foundation for subsequent investment.

Following the lead of the NT, in 2007–2008 Queensland Health appointed a CQI Coordinator and regional facilitators to support the implementation of CQI processes in Indigenous PHC

1  
2  
3 services as part of ABCD. A restructure in 2008 provided a key leverage point, and change  
4 through reform, as the funding for CQI was expanded from north Queensland specific to  
5 state-wide. A North Queensland CQI Steering committee was established in 2008 with key  
6 stakeholders, including Royal Flying Doctor Service, Apunipima Cape York Health Council  
7 and Queensland Health. There was a further investment in CQI in 2010, including a contract  
8 with One21seventy to provide CQI support to Indigenous health services.  
9  
10

11 In 2011, Queensland Health established a state-wide Primary Health Care CQI Steering  
12 Committee and a team with responsibility for CQI in Indigenous health services.[3] The team  
13 included two coordinators and 12 locally based facilitators, whose task was to develop and  
14 implement a coordinated CQI approach using One21seventy tools and processes with a focus  
15 on supporting Queensland Health services, although this support and access to One21seventy  
16 was available to Aboriginal Community Controlled Health Services (ACCHSs) as well. CQI  
17 was included in the Queensland Chronic Disease Guidelines, and the section on CQI was  
18 strengthened in 2008. This CQI initiative was part of the Queensland Chronic Disease Strategy  
19 and was supported by the Making Tracks Policy and Accountability Framework for improving  
20 health outcomes for Indigenous people (funded through Australian Government 'Closing the  
21 Gap' funding).[4]  
22  
23  
24

25 By late 2012, the CQI team established by the Queensland Health initiative was supporting 75  
26 services across the state to conduct CQI, with engagement of other service organizations in  
27 addition to those managed by Queensland Health. This work aligned with the development of  
28 evidence-based clinical guidelines, and orientation and training packages.[3] The infrastructure  
29 and policy support for CQI provided by Queensland Health was adversely affected by changes  
30 in the policy environment, with budget cuts and health reforms following the implementation  
31 of regionalization through the *Queensland Health and Hospitals Network Act 2011* and the  
32 change of government in Queensland in 2012. Contracts for CQI support and tools through  
33 One21seventy were discontinued and there was a loss of dedicated CQI support positions  
34 throughout the state.  
35  
36  
37

38 Other significant CQI work in Queensland included a partnership between the state's peak  
39 Indigenous health body, Queensland Aboriginal and Islander Health Council, and a state-based  
40 general practice organization that used collaborative-style methods, supported by  
41 implementation of an electronic clinical information system. A report for 2009-2010 showed  
42 high performance on a number of indicators, with wide variation between services on others.[5]  
43 In 2011 it was reported that 13 of the 21 Aboriginal Community Controlled Health Services  
44 were participating.[3]  
45  
46

47 Other Indigenous health organizations' have used CQI methods for clinical governance  
48 purposes at a regional level in recent years, for example Apunipima Cape York Health Council  
49 and Institute of Urban Indigenous Health.  
50  
51

## 52 ***New South Wales***

53 In New South Wales (NSW), participation in ABCD commenced in 2005, driven primarily by  
54 the initiative and resources of a regional ACCHS, Maari Ma Health Aboriginal Corporation,  
55 which used the CQI process to support and evaluate implementation of its Chronic Disease  
56 Strategy. This organization has gone on to integrate a systems-oriented CQI approach into the  
57 ongoing management of its service.[6]  
58  
59  
60

1  
2  
3 While NSW Health showed some interest in supporting engagement with ABCD more widely,  
4 there was no specific policy or funding support provided to services for their participation.  
5 However, several NSW-based ACCHSs and other PHC organizations' (such as Divisions of  
6 General Practice) used the ABCD tools through engaging with One21seventy. NSW Health  
7 funded the state's peak Indigenous health body, the Aboriginal Health and Medical Research  
8 Council (AHMRC), to support its member services with CQI activities through building  
9 infrastructure, skills and data collection systems, and to share models of good practice in CQI  
10 in the Indigenous PHC context. In 2015 the AHMRC produced web-based resources and a  
11 DVD describing success stories in 10 NSW ACCHSs, reflecting the use of a variety of tools,  
12 processes and approaches to CQI. Other than for those services participating in the ABCD  
13 program, or for a relatively small number of selected indicators available through national KPIs  
14 reporting, there appears to be no publicly available reports on clinical performance for  
15 Indigenous PHC services in NSW.  
16  
17  
18

### 19 *Western Australia*

20  
21  
22 In Western Australia (WA), the state government provided some funding for a project officer  
23 to work with the ABCD program between 2005 and 2009, but there was no clear policy or  
24 infrastructure to encourage engagement by PHC services. Continued engagement with the  
25 ABCD Program over 2010-2014 was supported by a project officer funded through the Lowitja  
26 Institute. Participation was heavily reliant on the initiative of individual services and the  
27 support of a small research team based with one of ABCD's academic partner organizations'  
28 and on the national ABCD project network. While some services were encouraged to use  
29 ABCD tools and processes through their participation in the national Healthy for Life program,  
30 there were inadequate resources to support the use of CQI tools and processes among services  
31 distributed across the vast distances of WA.  
32  
33  
34

35 Concurrent with the early implementation of ABCD in WA, the Aboriginal Health Council of  
36 WA (AHCWA) in 2006 implemented the Australian Primary Care Collaboratives program  
37 (referred to then as the National Primary Care Collaborative or NPCC) in seven selected sites.  
38 An evaluation of this initiative in mid-2007 reported that 'the central notions of quality  
39 improvement had been introduced' and that 'systems were in place to varying degrees', which  
40 created 'the potential to improve the way in which chronic health needs are addressed'.  
41  
42

43 However, the evaluation also noted that 'it was clear that there was a need for the NPCC  
44 Program to be more responsive to the needs and desires of specific ACCHSs'. While  
45 participating services were reported to be satisfied with the NPCC program, they were 'less  
46 enthusiastic about the program continuing', or its roll-out to other ACCHSs.[7]  
47  
48

49 Between 2012 and 2015, AHCWA engaged in a research partnership that had an initial focus  
50 on conducting a systematic review of the effectiveness of CQI programs in PHC settings in  
51 Indigenous and ethnic minority populations, and identifying common elements among  
52 programs with improved outcomes.[8]. There appear to be no publicly available reports on  
53 subsequent work arising from the AHCWA-Australian National University research  
54 partnership.  
55  
56

57 A review of WA Health Programs in 2014 argued for the implementation of a state-wide system  
58 for CQI with 'transparent measurements, accountable comparisons and resultant action plans',  
59 with specific reference to the evidence base developed by the ABCD Program and the benefits  
60 of adopting the One21seventy system.[9] In 2014-15, AHCWA acknowledged the generally

1  
2  
3 low capacity for CQI in the state, and reported the organization had begun actively promoting  
4 CQI to all member services.[10]  
5  
6

7 Five member services were reported to be engaged in CQI activities with a focus on health  
8 checks, smoking, otitis media and sexually transmitted infections. There is evidence that at  
9 least some local WA Indigenous PHC services had made substantial strides in the management  
10 of conditions such as Type 2 diabetes over the previous decade, [11] and in the development  
11 of local CQI systems more recently.[12]  
12

### 13 *South Australia*

14  
15  
16 Engagement of PHC services with the ABCD program in South Australia (SA) commenced in  
17 2006, with a few services using the ABCD tools on their own initiative. The SA State  
18 Government provided policy and funding support to the ABCD National Research Partnership  
19 between 2010-2014, with additional funding provided by the Lowitja Institute for a research  
20 officer to work closely with the Aboriginal Health Council of South Australia (AHCSA) as  
21 both a researcher and coordinator for participating ACCHSs. By 2012, in addition to 10  
22 ACCHSs, there were five state government-run health services using ABCD CQI tools and  
23 processes on a pilot basis, supported in various ways by their Local Health Networks.[13]  
24  
25

26 Policy support in SA was relatively limited and the implementation and ongoing CQI support  
27 to PHC services relied heavily on the small team based at AHCSA, and the ABCD project  
28 network. Research on PHC professionals' perspectives on barriers and enablers to CQI in the  
29 SA context identified health workforce capability - including the availability of CQI  
30 coordinator support – and senior management and leadership support for CQI as being vital to  
31 effective implementation. Organizational systems and individual behavior change, with  
32 regional collaborations and the use of systems approaches, were identified as key requirements  
33 for successful and sustained implementation of CQI.[13]  
34  
35

### 36 *References:*

- 37 1. Allen and Clark. Evaluation of the Northern Territory Continuous Quality  
38 Improvement Investment Strategy, 2013, Department of Health, Canberra.
- 39 2. Bailie RS, Si D, Robinson GW, Togni SJ, d Abbs PH. A multifaceted health-service  
40 intervention in remote Aboriginal communities: 3-year follow-up of the impact on  
41 diabetes care. Medical Journal of Australia. 2004 Aug 16;181:195-200.
- 42 3. Wise M, Angus S, Harris E, Parker S. Appraisal of Continuous Quality Improvement  
43 Initiatives in Aboriginal and Torres Strait Islander Primary Health Care. 2013,  
44 Lowitja Institute, Melbourne.
- 45 4. Queensland Health: Making Tracks towards closing the gap in health outcomes for  
46 Indigenous Queenslanders by 2033 – policy and accountability framework, Brisbane  
47 2010.
- 48 5. Panaretto KS, Gardner KL, Button S, Carson A, Schibasaki R, Wason G, et al.  
49 Prevention and management of chronic disease in Aboriginal and Islander  
50 Community Controlled Health Services in Queensland: a quality improvement study  
51 assessing change in selected clinical performance indicators over time in a cohort of  
52 services. BMJ Open. 2013 Jan 1;3(4):e002083.  
53  
54  
55  
56  
57  
58  
59  
60

- 1  
2  
3  
4  
5  
6  
7  
8  
9  
10  
11  
12  
13  
14  
15  
16  
17  
18  
19  
20  
21  
22  
23  
24  
25  
26  
27  
28  
29  
30  
31  
32  
33  
34  
35  
36  
37  
38  
39  
40  
41  
42  
43  
44  
45  
46  
47  
48  
49  
50  
51  
52  
53  
54  
55  
56  
57  
58  
59  
60
6. Maari Ma Health Aboriginal Corporation. Annual Report 2015/2015, Maari Ma Health Corporation, 2016.
7. Smith P. Thirdforce Consultancy Services. Evaluation Report of the Aboriginal Health Council of Western Australia's Implementation of the National Primary Health Care Collaboratives Program, September 2007.
8. Australian Primary Health Care Research Institute. [Internet] Systematic review of continuous quality improvement in Indigenous primary health care organisations. [cited 9<sup>th</sup> Dec 2016]. Available from: <http://aphcri.anu.edu.au/aphcrianu/projects/systematic-review-continuous-quality-improvement-indigenous-primary-health-care>
9. Holman CDJ, Joyce SJ. A Promising Future: WA Aboriginal Health Programs. Review of performance with recommendations for consolidation and advance. December 2014, Department of Health Western Australia, Perth.
10. Aboriginal Health Council of Western Australia, Annual Report 2014 – 2015, AHCWA, Highgate.
11. Marley JV, Nelson C, O'Donnell V, Atkinson D. Quality indicators of diabetes care: an example of remote-area Aboriginal primary health care over 10 years. Medical Journal of Australia. 2012 Oct 1;197(7):404.
12. Stoneman A, Atkinson D, Davey M, Marley JV. Quality improvement in practice: improving diabetes care and patient outcomes in Aboriginal Community Controlled Health Services. BMC health services research. 2014 Oct 7;14(1):1.
13. Newham J, Schierhout G, Bailie R, Ward PR. 'There's only one enabler; come up, help us': staff perspectives of barriers and enablers to continuous quality improvement in Aboriginal primary health-care settings in South Australia. Australian Journal of Primary Health. 2015 Feb 27.

1  
2  
3  
4  
5  
6  
7  
8  
9  
10  
11  
12  
13  
14  
15  
16  
17  
18  
19  
20  
21  
22  
23  
24  
25  
26  
27  
28  
29  
30  
31  
32  
33  
34  
35  
36  
37  
38  
39  
40  
41  
42  
43  
44  
45  
46  
47  
48  
49  
50  
51  
52  
53  
54  
55  
56  
57  
58  
59  
60

For peer review only



1  
2  
3  
4  
5  
6  
7  
8  
9  
10  
11  
12  
13  
14  
15  
16  
17  
18  
19  
20  
21  
22  
23  
24  
25  
26  
27  
28  
29  
30  
31  
32  
33  
34  
35  
36  
37  
38  
39  
40  
41  
42  
43  
44  
45  
46  
47  
48  
49

| SQUIRE Category                                                          | SQUIRE Explanation                                                                                                                                                                                                                                 | Authors response                                                                                                                                                                                                                                                                                                                                                                                                                                                                                                                                                                                                                                                                                                                                                                                                                                                                                                                                                                                                                                                                                                                                                                                                                                                                              |
|--------------------------------------------------------------------------|----------------------------------------------------------------------------------------------------------------------------------------------------------------------------------------------------------------------------------------------------|-----------------------------------------------------------------------------------------------------------------------------------------------------------------------------------------------------------------------------------------------------------------------------------------------------------------------------------------------------------------------------------------------------------------------------------------------------------------------------------------------------------------------------------------------------------------------------------------------------------------------------------------------------------------------------------------------------------------------------------------------------------------------------------------------------------------------------------------------------------------------------------------------------------------------------------------------------------------------------------------------------------------------------------------------------------------------------------------------------------------------------------------------------------------------------------------------------------------------------------------------------------------------------------------------|
| <b>Title and Abstract</b>                                                |                                                                                                                                                                                                                                                    |                                                                                                                                                                                                                                                                                                                                                                                                                                                                                                                                                                                                                                                                                                                                                                                                                                                                                                                                                                                                                                                                                                                                                                                                                                                                                               |
| 1. Title                                                                 | Indicate that the manuscript concerns an initiative to improve healthcare (broadly defined to include the quality, safety, effectiveness, patient-centeredness, timeliness, cost, efficiency, and equity of healthcare, or access to it).          | Page 1- The title of the manuscript indicates that it is a comparative case study looking at the impact of policy support on the uptake of CQI activities and the impact on quality of care and the context in which it occurred. <i>“Impact of policy support on uptake of evidence-based continuous quality improvement activities and the quality of care for Indigenous Australians: a comparative case study.”</i>                                                                                                                                                                                                                                                                                                                                                                                                                                                                                                                                                                                                                                                                                                                                                                                                                                                                       |
| 2. Abstract                                                              | <ul style="list-style-type: none"> <li>• Provide adequate information to aid in searching and indexing</li> <li>• Summarize all key information from various sections of the text using the abstract format of the intended publication</li> </ul> | Page 2 - We have structured the abstract as required by BMJ Open using the headings Objectives, Design, Setting, Participants, Interventions, Results and Conclusions.                                                                                                                                                                                                                                                                                                                                                                                                                                                                                                                                                                                                                                                                                                                                                                                                                                                                                                                                                                                                                                                                                                                        |
| <b>Introduction</b>                                                      |                                                                                                                                                                                                                                                    |                                                                                                                                                                                                                                                                                                                                                                                                                                                                                                                                                                                                                                                                                                                                                                                                                                                                                                                                                                                                                                                                                                                                                                                                                                                                                               |
| 3. Problem description and available knowledge<br>4. available knowledge | <ul style="list-style-type: none"> <li>• Nature and significance of the local problem</li> <li>• Summary of what is currently known about the problem, including relevant previous studies</li> </ul>                                              | <p>The introduction clearly identifies the current relevant evidence and the current gap in knowledge.</p> <p>Page 4; Line 5 - <i>“Internationally, there is wide variation in adherence to best practice clinical guidelines between health services and between health professionals.[1] There is a growing body of evidence about the effectiveness of continuous quality improvement (CQI) in increasing adherence to guidelines and on the factors that contribute to this.[2] Variation in quality of care between health services has been demonstrated, including in populations with poorer health status, such as Aboriginal and Torres Strait Islander (hereafter respectfully referred to as Indigenous) peoples in Australia.[3,4]”</i></p> <p>Page 4; Line 43 - <i>“While system-wide approaches to CQI have been associated with achieving large-scale improvements in health outcomes, there is limited evidence of the effectiveness of CQI over an extended period.[2] A positive policy environment is widely recognised as vital for effective development and implementation of programs to prevent and manage chronic disease,[8] with previous cross-regional analyses identifying the importance of regional level policies in enhancing clinical performance</i></p> |

|                                                   |                                                                                                                                                                                                                                                                                                             |                                                                                                                                                                                                                                                                                                                                                                                                                                                                                                                                                                                                                                                                                                                                                                                                                                                            |
|---------------------------------------------------|-------------------------------------------------------------------------------------------------------------------------------------------------------------------------------------------------------------------------------------------------------------------------------------------------------------|------------------------------------------------------------------------------------------------------------------------------------------------------------------------------------------------------------------------------------------------------------------------------------------------------------------------------------------------------------------------------------------------------------------------------------------------------------------------------------------------------------------------------------------------------------------------------------------------------------------------------------------------------------------------------------------------------------------------------------------------------------------------------------------------------------------------------------------------------------|
|                                                   |                                                                                                                                                                                                                                                                                                             | <i>in Indigenous PHC in Australia.[4] However, there is limited evidence as to the effect of government policy on the uptake and impact of CQI over time.”</i>                                                                                                                                                                                                                                                                                                                                                                                                                                                                                                                                                                                                                                                                                             |
| 5. Rationale                                      | Informal or formal frameworks, models, concepts, and/or theories used to explain the problem, any reasons or assumptions that were used to develop the intervention(s), and reasons why the intervention(s) was expected to work.                                                                           | <p>Page 5; Line 3 - <i>“This paper examines the influence of health policy decisions at the Australian state/territory level and how these may have influenced:</i></p> <ul style="list-style-type: none"> <li><i>i) trends in the consistent uptake of evidence-based CQI tools ...</i></li> <li><i>ii) quality of care (as reflected in adherence to best practice guidelines) in Indigenous PHC services.”</i></li> </ul> <p>Page 7; Line 26 - <i>“We use a comparative case study design to relate state/territory level policy support for CQI to trends in its uptake and in quality of care”</i></p>                                                                                                                                                                                                                                                |
| 6. Specific Aims                                  | Purpose of the project and of this report                                                                                                                                                                                                                                                                   | <p>The specific aim is clearly stated in the abstract and in the main body of the paper. Abstract Page 2; Line 3- <i>We examined the impact of state/territory policy support on 1) uptake of evidence-based CQI activities, and 2) quality of care for Indigenous Australians.</i></p> <p>Main body of paper Page 5; Line 3:<br/><i>This paper examines the influence of health policy decisions at the Australian state/territory level and how these may have influenced:</i></p> <ul style="list-style-type: none"> <li><i>i) trends in the consistent uptake of evidence-based CQI tools available through a research-based CQI initiative (the Audit and Best Practice in Chronic Disease (ABCD) Program; and</i></li> <li><i>ii) quality of care (as reflected in adherence to best practice guidelines) in Indigenous PHC services.</i></li> </ul> |
| <b>Methods – what did you do?</b>                 |                                                                                                                                                                                                                                                                                                             |                                                                                                                                                                                                                                                                                                                                                                                                                                                                                                                                                                                                                                                                                                                                                                                                                                                            |
| 7. Context                                        | Contextual elements considered important at the outset of introducing the intervention(s)                                                                                                                                                                                                                   | We have described the context of the study in the introduction - national policy context of CQI in Indigenous primary health care, Indigenous peoples health and access to primary care, ABCD Program of work. Because understanding of the context is relevant to the aim we have included this information in the introduction before the statement of the aim (see Page 4 Line 18 – 55; Page 5 Line 16- 36)                                                                                                                                                                                                                                                                                                                                                                                                                                             |
| 8. Intervention &<br>9. Study of the intervention | <ul style="list-style-type: none"> <li>• Description of the intervention(s) in sufficient detail that others could reproduce it and specifics of the team involved in the work</li> <li>• Approach chosen for assessing the impact of the intervention(s) and approach used to establish whether</li> </ul> | <ul style="list-style-type: none"> <li>• The policy and infrastructure support provided in different jurisdictions is described in depth in the findings section (see Page 9 onwards) and also in supplementary material.</li> <li>• The methods are described in detail (see Page 7 onwards).</li> </ul>                                                                                                                                                                                                                                                                                                                                                                                                                                                                                                                                                  |

1  
2  
3  
4  
5  
6  
7  
8  
9  
10  
11  
12  
13  
14  
15  
16  
17  
18  
19  
20  
21  
22  
23  
24  
25  
26  
27  
28  
29  
30  
31  
32  
33  
34  
35  
36  
37  
38  
39  
40  
41  
42  
43  
44  
45  
46  
47  
48  
49

|                            |                                                                                                                                                                                                                                                                                                                                                                                                                                                                       |                                                                                                                                                                                                                                                                                                                                                                                                                                                                                                                                                                                                                                                                                                                                                                                                                                                                                                                                                                                                                                                                                                                                                                                                                                 |
|----------------------------|-----------------------------------------------------------------------------------------------------------------------------------------------------------------------------------------------------------------------------------------------------------------------------------------------------------------------------------------------------------------------------------------------------------------------------------------------------------------------|---------------------------------------------------------------------------------------------------------------------------------------------------------------------------------------------------------------------------------------------------------------------------------------------------------------------------------------------------------------------------------------------------------------------------------------------------------------------------------------------------------------------------------------------------------------------------------------------------------------------------------------------------------------------------------------------------------------------------------------------------------------------------------------------------------------------------------------------------------------------------------------------------------------------------------------------------------------------------------------------------------------------------------------------------------------------------------------------------------------------------------------------------------------------------------------------------------------------------------|
|                            | the observed outcomes were due to the intervention(s)                                                                                                                                                                                                                                                                                                                                                                                                                 | <ul style="list-style-type: none"> <li>The outcome measures (trends in CQI activity and trends in quality of care) are described in the methods section (Page 7; Line 56 – Page 8 Line 30).</li> <li>Questions of attribution or observed trends to policy and infrastructure are addressed in the discussion (Page 15 onwards)</li> </ul>                                                                                                                                                                                                                                                                                                                                                                                                                                                                                                                                                                                                                                                                                                                                                                                                                                                                                      |
| 10. Measures               | <ul style="list-style-type: none"> <li>Measures chosen for studying processes and outcomes of the intervention(s), including rationale for choosing them, their operational definitions, and their validity and reliability</li> <li>Description of the approach to the ongoing assessment of contextual elements that contributed to the success, failure, efficiency, and cost</li> <li>Methods employed for assessing completeness and accuracy of data</li> </ul> | <p>The case study methods are explained in the first paragraph in the methods section. For example, Page 7; Line 26 - <i>‘We use a comparative case study design to relate state/territory level policy support for CQI to trends in its uptake and in quality of care. The five states/territories provide the ‘cases’ for comparison as they all have some consistent CQI data available through participation by services in the ABCD Program.’</i></p> <p>The case study method captures the contextual elements that may have influenced the intervention and outcomes.</p> <p>Details of the clinical audit methods are detailed in the methods (Page 7; Line 26), table 1 (Page 5; Line 43) and supplementary material (Page 24). For example (Page 7; Line 46), <i>‘Data on CQI activity and on adherence to clinical best practice guidelines were available through ABCD. This paper focuses on four priority aspects of care: preventive, Type 2 diabetes, maternal care and child health. The CQI and clinical record audit processes through which data are collected and reported at health service level are summarized in Table 1 and Additional File 1, and described in more detail elsewhere.[3,12]’</i></p> |
| 11. Analysis               | <ul style="list-style-type: none"> <li>Qualitative and quantitative methods used to draw inferences from the data</li> <li>Methods for understanding variation within the data, including the effects of time as a variable</li> </ul>                                                                                                                                                                                                                                | <p>The methods section (page 7 onwards) of the manuscript contains a full description of the methods utilised. We also provide a supplementary file (see Additional File 1) that contains further details on methods.</p> <p>Variation in the audit data are reflected in the box plots in the Supplementary Material (Page 25 onwards).</p>                                                                                                                                                                                                                                                                                                                                                                                                                                                                                                                                                                                                                                                                                                                                                                                                                                                                                    |
| 12. Ethical considerations | Ethical aspects of implementing and studying the intervention(s) and how they were addressed, including, but not limited to, formal ethics review and potential conflict(s) of interest                                                                                                                                                                                                                                                                               | <p>A statement about formal ethical approval has been made within the manuscript. For example (page 9; Line 7-11), <i>“Ethical approval for the ABCD National Research Partnership was obtained from research ethics committees in each relevant Australian jurisdiction.”</i></p> <p>A more detailed version of ethics statement is made at the end of the paper with other declarations, see Page 20; Line 20.</p>                                                                                                                                                                                                                                                                                                                                                                                                                                                                                                                                                                                                                                                                                                                                                                                                            |

3  
SQUIRE guidelines

|                                        |                                                                                                                                                                                                                                                                                                                                                                                                                                                                                                                                                                                                                                           |                                                                                                                                                                                                                                                                                                                                                                                                                                                                                                                                                                                                                                                                                                                                                                                                                                                                                                                                                                                                                                                                                                                                                                                                                                                                                                                                   |
|----------------------------------------|-------------------------------------------------------------------------------------------------------------------------------------------------------------------------------------------------------------------------------------------------------------------------------------------------------------------------------------------------------------------------------------------------------------------------------------------------------------------------------------------------------------------------------------------------------------------------------------------------------------------------------------------|-----------------------------------------------------------------------------------------------------------------------------------------------------------------------------------------------------------------------------------------------------------------------------------------------------------------------------------------------------------------------------------------------------------------------------------------------------------------------------------------------------------------------------------------------------------------------------------------------------------------------------------------------------------------------------------------------------------------------------------------------------------------------------------------------------------------------------------------------------------------------------------------------------------------------------------------------------------------------------------------------------------------------------------------------------------------------------------------------------------------------------------------------------------------------------------------------------------------------------------------------------------------------------------------------------------------------------------|
|                                        |                                                                                                                                                                                                                                                                                                                                                                                                                                                                                                                                                                                                                                           | We have also provided a statement about any potential conflict of interests and funding sources, see Page 19, Line 37 and Page 20, Line 43 respectively.                                                                                                                                                                                                                                                                                                                                                                                                                                                                                                                                                                                                                                                                                                                                                                                                                                                                                                                                                                                                                                                                                                                                                                          |
| <b>Results – What did you find?</b>    |                                                                                                                                                                                                                                                                                                                                                                                                                                                                                                                                                                                                                                           |                                                                                                                                                                                                                                                                                                                                                                                                                                                                                                                                                                                                                                                                                                                                                                                                                                                                                                                                                                                                                                                                                                                                                                                                                                                                                                                                   |
| 13. Results                            | <ul style="list-style-type: none"> <li>Initial steps of the intervention(s) and their evolution over time (e.g., time-line diagram, flow chart, or table), including modifications made to the intervention during the project</li> <li>Details of the process measures and outcome</li> <li>Contextual elements that interacted with the intervention(s)</li> <li>Observed associations between outcomes, interventions, and relevant contextual elements</li> <li>Unintended consequences such as unexpected benefits, problems, failures, or costs associated with the intervention(s).</li> <li>Details about missing data</li> </ul> | <p>We have presented the findings under two major headings that link directly to the aims of the manuscript.</p> <ul style="list-style-type: none"> <li><i>Policy initiatives that may have influenced uptake of the ABCD Program CQI, by state and territory</i> (see Page 9 ; Line 16)</li> <li><i>Trends in quality of care</i> (see Page 13 ; Line 51)</li> </ul>                                                                                                                                                                                                                                                                                                                                                                                                                                                                                                                                                                                                                                                                                                                                                                                                                                                                                                                                                             |
| <b>Discussion – what does it mean?</b> |                                                                                                                                                                                                                                                                                                                                                                                                                                                                                                                                                                                                                                           |                                                                                                                                                                                                                                                                                                                                                                                                                                                                                                                                                                                                                                                                                                                                                                                                                                                                                                                                                                                                                                                                                                                                                                                                                                                                                                                                   |
| 14. Summary                            | <ul style="list-style-type: none"> <li>Key findings, including relevance to the rationale and specific aims</li> <li>Particular strengths of the project</li> </ul>                                                                                                                                                                                                                                                                                                                                                                                                                                                                       | <p>The first two paragraphs of the discussion are a summary of the key findings in relation to the aims of the paper. For example, (Page 15; Line 17))</p> <p><i>“Progressive and sustained uptake of ABCD tools occurred in the NT in the context of consistent long-term policy and infrastructure support for CQI. This contrasted with a) a rapid rise and subsequent fall in uptake of these tools in Queensland where the initial high-level policy and infrastructure support was not sustained following a change of government in 2012; and b) low levels of uptake in jurisdictions with relatively less policy and infrastructure support (NSW, WA, SA). The consistent long-term policy and infrastructure support for CQI in the NT was also associated with steady improvements or maintenance of high-quality care (as reflected in clinical best practice guidelines) for the four aspects of care that were the major focus of ABCD CQI efforts, and reduction in variation between health services for two of these. This contrasted with the situation in Queensland where there was a relatively limited effect on adherence to best practice guidelines and on variation between health services.”</i></p> <p><i>“While this study does not provide an in-depth examination of the complex processes</i></p> |

1  
2  
3  
4  
5  
6  
7  
8  
9  
10  
11  
12  
13  
14  
15  
16  
17  
18  
19  
20  
21  
22  
23  
24  
25  
26  
27  
28  
29  
30  
31  
32  
33  
34  
35  
36  
37  
38  
39  
40  
41  
42  
43  
44  
45  
46  
47  
48  
49

|                    |                                                                                                                                                                                                                                                                                                                                                                                                                                                      |                                                                                                                                                                                                                                                                                                                                                                                                                                                                                                                                                                                                                                                                                                                                                                                                                                                                                                                                                                                                                                                                                                                                                                                                                                                                                                                                                                                                                  |
|--------------------|------------------------------------------------------------------------------------------------------------------------------------------------------------------------------------------------------------------------------------------------------------------------------------------------------------------------------------------------------------------------------------------------------------------------------------------------------|------------------------------------------------------------------------------------------------------------------------------------------------------------------------------------------------------------------------------------------------------------------------------------------------------------------------------------------------------------------------------------------------------------------------------------------------------------------------------------------------------------------------------------------------------------------------------------------------------------------------------------------------------------------------------------------------------------------------------------------------------------------------------------------------------------------------------------------------------------------------------------------------------------------------------------------------------------------------------------------------------------------------------------------------------------------------------------------------------------------------------------------------------------------------------------------------------------------------------------------------------------------------------------------------------------------------------------------------------------------------------------------------------------------|
|                    |                                                                                                                                                                                                                                                                                                                                                                                                                                                      | <p><i>that might explain different trends in the uptake of tools, or how CQI processes have impacted on quality of care in different jurisdictions, some insight has been provided by previous studies of the ABCD CQI program and the evaluation of the NT CQI Strategy. Gardner highlighted the complexity of the process of uptake of CQI, and the critical role of alignment of policies and incentives; a systems approach; organization-wide commitment; leadership at all levels; and resources to support implementation.[14] Our findings of relatively low uptake of CQI in jurisdictions with limited policy and infrastructure support, and the rapid drop in use of CQI tools when policy, infrastructure and funding support was withdrawn in Queensland, highlights the critical role these play in supporting its uptake. In other states, the lack of clear and consistent policy direction, resourcing and sustained high-level leadership and management support for CQI, and relative lack of engagement in wide-scale CQI research has led to a diversity of locally driven initiatives with an associated lack of systematic analysis and reporting of data for CQI purposes. This appears to have been a barrier to demonstrably effective uptake of CQI in many Indigenous PHC services between 2005 and 2014.”</i></p>                                                                  |
| 15. Interpretation | <ul style="list-style-type: none"> <li>• Nature of the association between the intervention(s) and the outcomes</li> <li>• Comparison of results with findings from other publications</li> <li>• Impact of the project on people and systems</li> <li>• Reasons for any differences between observed and anticipated outcomes, including the influence of context</li> <li>• Costs and strategic trade-offs, including opportunity costs</li> </ul> | <p>We have included a section in the discussion on interpretation and comparison to relevant literature:</p> <p>For example (page 16; Line 11) , <i>“The limited availability of data for systematic analysis and reporting of relevant data, other than in Queensland and NT, has precluded meaningful analysis of adherence to best practice guidelines for most states/territories. The first report on national Key Performance Indicators (nKPIs) from Indigenous PHC organizations showed that in 2012-13 those in Queensland and the NT performed better against almost all process-of-care indicators,[20] attributing this to the relatively well-established CQI programs in these jurisdictions. The third and most recent nKPI report, which includes data up to December 2014,[21] shows improvements for 17 of the 19 process-of-care measures for all jurisdictions combined, with continued relatively high performance in the NT and Queensland and most marked recent improvement in WA. The analysis presented in this paper points to the importance of high-level policy support and resourcing for implementation of systematic CQI processes to enhance quality of care. The relatively high performance, and the greater ability to report nKPI data, in the NT and Queensland demonstrate the benefits of systematic CQI processes for reporting of data on KPIs as well as for</i></p> |

|                                                                                                                                                                                                                                                                              |                                                                                                                                                                                                                                                                                                                       |                                                                                                                                                                                                                                                                                                                                                                                                                                                                                                                                                                                                                                                                                                                                                                                                                                                                                                                                                                                                                                                                                                                                                                                                                                                                                                                                                                                                                                                                                                                                                                                                                                                                                                                                                                                                                                                                                                                                                                                                                                                                                                                                                               |
|------------------------------------------------------------------------------------------------------------------------------------------------------------------------------------------------------------------------------------------------------------------------------|-----------------------------------------------------------------------------------------------------------------------------------------------------------------------------------------------------------------------------------------------------------------------------------------------------------------------|---------------------------------------------------------------------------------------------------------------------------------------------------------------------------------------------------------------------------------------------------------------------------------------------------------------------------------------------------------------------------------------------------------------------------------------------------------------------------------------------------------------------------------------------------------------------------------------------------------------------------------------------------------------------------------------------------------------------------------------------------------------------------------------------------------------------------------------------------------------------------------------------------------------------------------------------------------------------------------------------------------------------------------------------------------------------------------------------------------------------------------------------------------------------------------------------------------------------------------------------------------------------------------------------------------------------------------------------------------------------------------------------------------------------------------------------------------------------------------------------------------------------------------------------------------------------------------------------------------------------------------------------------------------------------------------------------------------------------------------------------------------------------------------------------------------------------------------------------------------------------------------------------------------------------------------------------------------------------------------------------------------------------------------------------------------------------------------------------------------------------------------------------------------|
| <p>1<br/>2<br/>3<br/>4<br/>5<br/>6<br/>7<br/>8<br/>9<br/>10<br/>11<br/>12<br/>13<br/>14<br/>15<br/>16<br/>17<br/>18<br/>19<br/>20<br/>21<br/>22<br/>23<br/>24<br/>25<br/>26<br/>27<br/>28<br/>29<br/>30<br/>31<br/>32<br/>33<br/>34<br/>35<br/>36</p> <p>16. Limitations</p> | <ul style="list-style-type: none"> <li>• Limits to the generalizability of the work</li> <li>• Factors that might have limited internal validity such as confounding, bias, or imprecision in the design, methods, measurement, or analysis</li> <li>• Efforts made to minimize and adjust for limitations</li> </ul> | <p><i>enhancing quality of care.</i></p> <p>In our discussion we have a number of paragraphs that outline the limitations of the work, efforts made to minimize limitations and generalizability. For example (page 17: Line 10 – Line 52),</p> <p><i>“An important limitation of our study is that it is not possible to determine clearly the extent to which trends in data on quality of care have been influenced by policy support for the ABCD CQI program or to other initiatives (e.g. funding, workforce or infrastructure developments). The difficulty of demonstrating causality is common to much policy research,[22] however we argue here for contribution rather than attribution ....”</i></p> <p><i>“The ABCD data are not representative of all Indigenous PHC services. There was variable participation in different jurisdictions and by government-operated and community-controlled health services. ...The ABCD data need to be interpreted in relation to a range of other CQI activities in Indigenous PHC services over the period for which data has been reported[9,11]. While there were some substantial initiatives, particularly in the NT and Queensland, most CQI initiatives were small scale, narrow in scope and without the capability to analyze and report consistent data to the extent possible through ABCD. Nor has it been possible to assess systematically these CQI activities or their impact on quality of care. In addition, there were a range of non-CQI initiatives at the national [e.g. Indigenous Chronic Disease Package [23] and local levels, which may have impacted on quality of care over the period for which we have reported data.”</i></p> <p><i>The authors of this paper have all had longstanding involvement with the ABCD Program as researchers, service providers, managers or policy makers/advisors. While our interest in ABCD may have influenced our interpretation of the data, the diversity of roles, insights and perspectives that we bring allows for critical reflection in the interpretation of the data, and brings rigor to this type of research.[22]</i></p> |
| <p>37<br/>38<br/>39<br/>40<br/>41</p> <p>17. Conclusions</p>                                                                                                                                                                                                                 | <ul style="list-style-type: none"> <li>• Usefulness of the work</li> <li>• Sustainability</li> <li>• Potential for spread to other contexts</li> <li>• Implications for practice and for further study in the field</li> </ul>                                                                                        | <p>Within the discussion we address implications for policy, practice and further research. For example (page 17; Line 55),</p> <p><i>“The ABCD experience, as reflected in this paper, has important implications for practice, policy and further research, including the implementation of the National</i></p>                                                                                                                                                                                                                                                                                                                                                                                                                                                                                                                                                                                                                                                                                                                                                                                                                                                                                                                                                                                                                                                                                                                                                                                                                                                                                                                                                                                                                                                                                                                                                                                                                                                                                                                                                                                                                                            |

1  
2  
3  
4  
5  
6  
7  
8  
9  
10  
11  
12  
13  
14  
15  
16  
17  
18  
19  
20  
21  
22  
23  
24  
25  
26  
27  
28  
29  
30  
31  
32  
33  
34  
35  
36  
37  
38  
39  
40  
41  
42  
43  
44  
45  
46  
47  
48  
49

|                          |                                                                                                                                                     |                                                                                                                                                                                                                                                                                                                                                                                                                                                                                                                                                                                                                                                                                                                                                                                                                                                                                                                                                                                                                                                                                                                                                                                                                                                                                                                                                                                                                                                                                                                                                                                                                                                                                                                                                                                                                                                                                                                                                                                                                                                                                                                                                          |
|--------------------------|-----------------------------------------------------------------------------------------------------------------------------------------------------|----------------------------------------------------------------------------------------------------------------------------------------------------------------------------------------------------------------------------------------------------------------------------------------------------------------------------------------------------------------------------------------------------------------------------------------------------------------------------------------------------------------------------------------------------------------------------------------------------------------------------------------------------------------------------------------------------------------------------------------------------------------------------------------------------------------------------------------------------------------------------------------------------------------------------------------------------------------------------------------------------------------------------------------------------------------------------------------------------------------------------------------------------------------------------------------------------------------------------------------------------------------------------------------------------------------------------------------------------------------------------------------------------------------------------------------------------------------------------------------------------------------------------------------------------------------------------------------------------------------------------------------------------------------------------------------------------------------------------------------------------------------------------------------------------------------------------------------------------------------------------------------------------------------------------------------------------------------------------------------------------------------------------------------------------------------------------------------------------------------------------------------------------------|
|                          | <ul style="list-style-type: none"> <li>Suggested next steps</li> </ul>                                                                              | <p><i>CQI Framework for Aboriginal and Torres Strait Islander PHC [9]. For clinical staff and management of health services, the benefits of participating in this type of collaborative program include access to a CQI system that provides data on recent performance and trend data across the broad scope of primary care, and the ability to benchmark against other services at the regional, state/territory and national level. For policy professionals, benefits include the ability to monitor adherence to best practice guidelines at all levels, and to target improvements to specific aspects or modes of care, [19] population groups (e.g. children or the elderly) or geographic locations. An important challenge for ongoing and new CQI initiatives is to enhance local ownership and engagement, while ensuring the use of standard tools and supporting the analytical capability that enables the use of consistent good quality data for CQI purposes at multiple levels of the system. Sustaining efforts to deliver the best care according to changing evidence over time remains important and warrants further attention.”</i></p> <p>Our concluding statement also contains information about next steps and potential spread. For example (Page 18; Line 23),</p> <p><i>“Our study adds to the accumulating evidence on the conditions that enable CQI efforts to be most effective. The findings show the potential contribution that systematic and sustained policy and infrastructure support can make to wide-scale uptake and to the effectiveness of CQI methods in improving the quality of care. It is now about 10 years since our first published paper on the potential for CQI to enhance the quality of health care for Indigenous Australians. With the development of a National CQI Framework in 2015 [9] it appears we may be at the dawn of a new era of wide-scale and systematic use of CQI methods. While local efforts are vital to the effective use of CQI methods, state/territory-level policy and resources will be critical to building capability and a supportive environment.”</i></p> |
| <b>Other information</b> |                                                                                                                                                     |                                                                                                                                                                                                                                                                                                                                                                                                                                                                                                                                                                                                                                                                                                                                                                                                                                                                                                                                                                                                                                                                                                                                                                                                                                                                                                                                                                                                                                                                                                                                                                                                                                                                                                                                                                                                                                                                                                                                                                                                                                                                                                                                                          |
| 18. Funding              | Sources of funding that supported this work. Role, if any, of the funding organization in the design, implementation, interpretation, and reporting | We have made full disclosure of funding (see Page 20 ; Line 10) and any conflicts of interest (page 19; Line 37) within the manuscript.                                                                                                                                                                                                                                                                                                                                                                                                                                                                                                                                                                                                                                                                                                                                                                                                                                                                                                                                                                                                                                                                                                                                                                                                                                                                                                                                                                                                                                                                                                                                                                                                                                                                                                                                                                                                                                                                                                                                                                                                                  |

7  
SQUIRE guidelines
